# Supplementary material for: 5-(1H-Indol-3-ylmethylene)-4-oxo-2-thioxothiazolidin-3-yl)alkancarboxylic Acids as Antimicrobial Agents: Synthesis, Biological Evaluation, and Molecular Docking Studies
Source: PubMed Central journal article supplement (PMC7221690; doi:10.3390/molecules25081964), 2020-04-23
Supplement: molecules-25-01964-s001.pdf [file molecules-25-01964-s001.pdf]

**5-(1*H*-Indole-3-ylmethyl)-4-oxo-2-thioxothiazolidin-3-yl)alkancarboxylic acids as antimicrobial agents. Synthesis, biological evaluation and molecular docking studies.**

Horishny V.Ya.<sup>1</sup>, Kartsev V.G.<sup>2</sup>, Matychuk V.S.<sup>3</sup>, Geronikaki A<sup>4</sup>., Petrou<sup>4</sup>., Glamoclija J.<sup>5</sup>, Ciric A.<sup>5</sup>, Sokovic M.<sup>5</sup>

<sup>1</sup> *Danylo Halytsky Lviv National Medical University, 79010, Ukraine, Lviv, Pekarska 69*

<sup>2</sup> *InterBioScreen, Moscow, Russia*

<sup>3</sup> *Aristotle University, School of Pharmacy, Thessaloniki, Greece*

<sup>4</sup> *Ivan Franko National University of Lviv, 79005, Ukraine, Lviv, Kyryla i Mefodia 6.*

<sup>5</sup> *Aristotle University of Thessaloniki, School of Pharmacy, Thessaloniki, 54124, Greece.*

<sup>6</sup> *Mycological Laboratory, Institute of Biological Research Sinisa Stankovic, Belgrade University, Serbia*

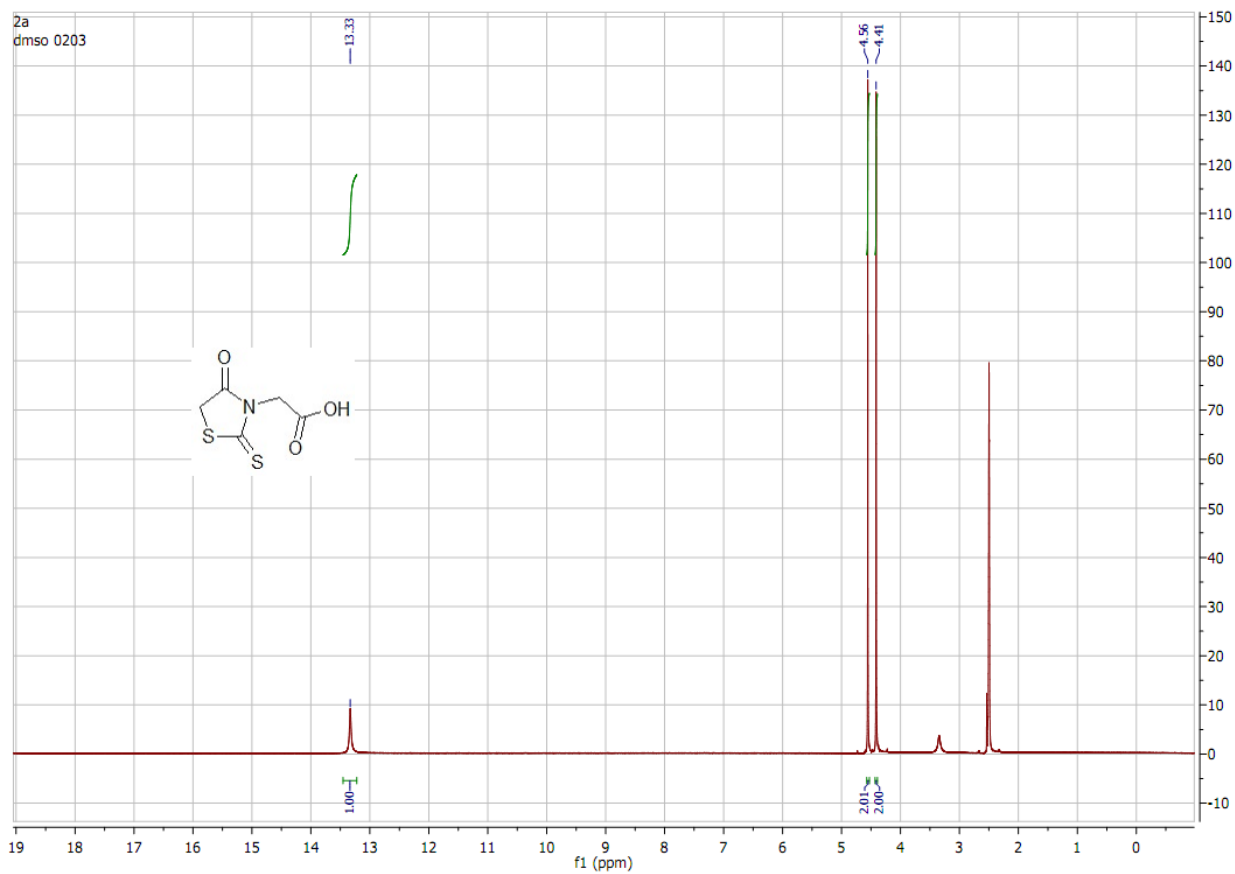

**Figure S1.**  $^1\text{H}$ NMR spectrum (400 MHz, DMSO- $d_6$ ) of compound **2a**.

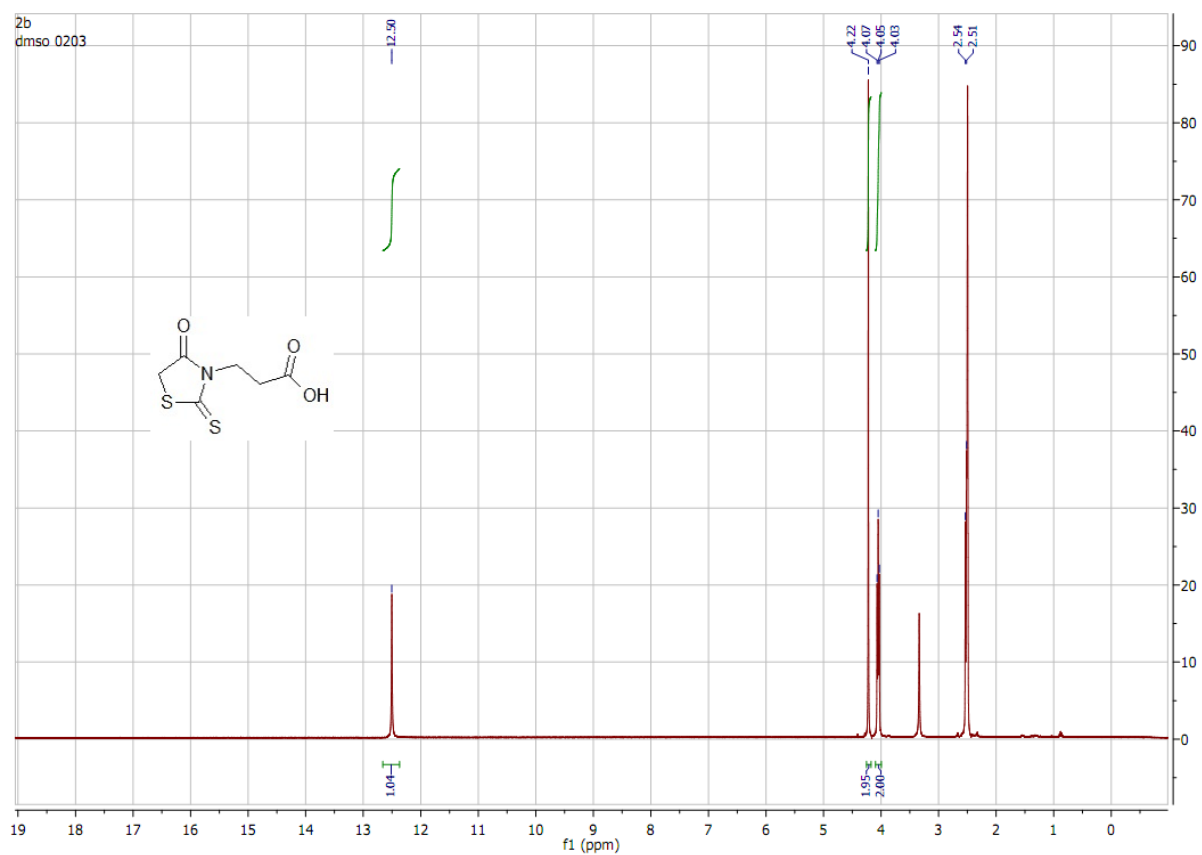

**Figure S2.**  $^1\text{H}$ NMR spectrum (400 MHz, DMSO- $d_6$ ) of compound **2b**.

**Figure S3.**  $^1\text{H}$ NMR spectrum (400 MHz, DMSO- $d_6$ ) of compound **2c**.

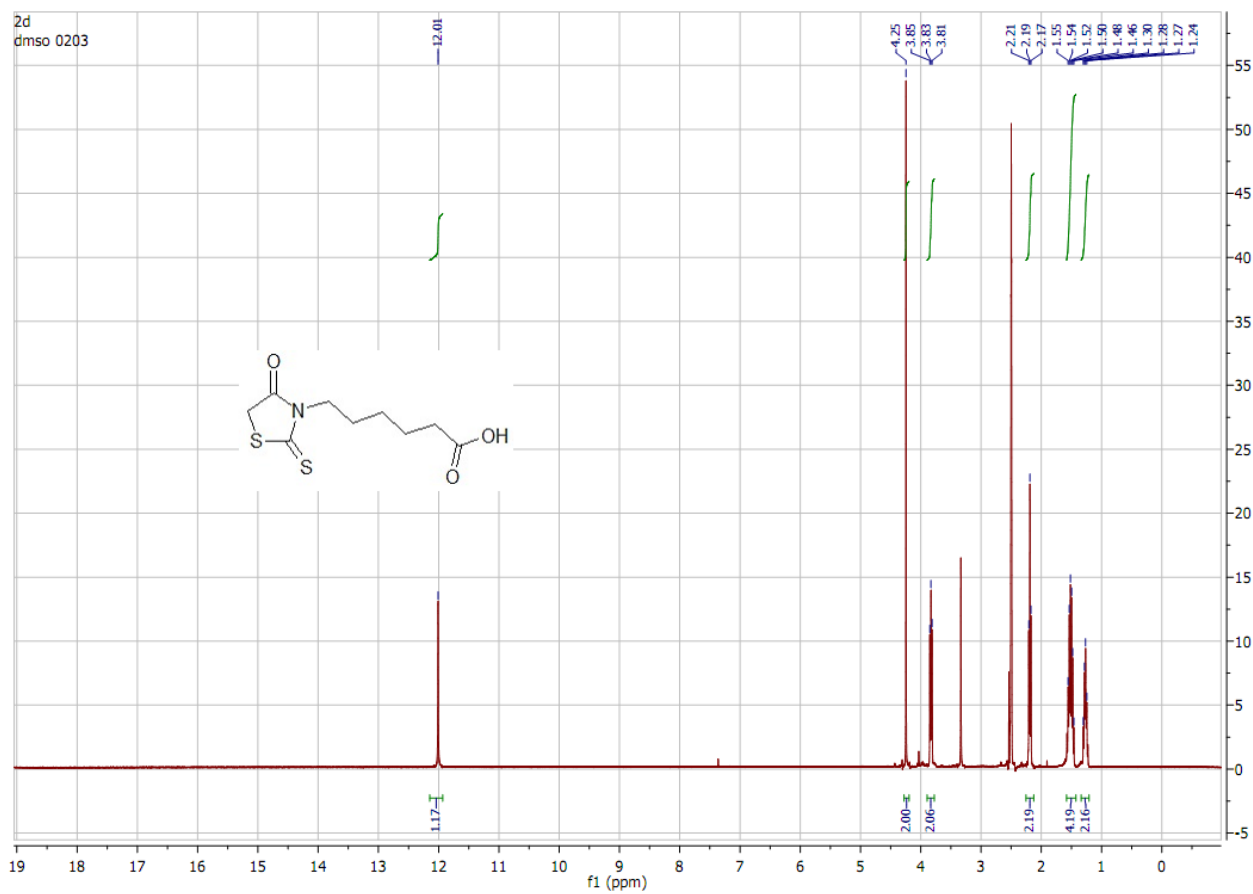

**Figure S4.**  $^1\text{H}$ NMR spectrum (400 MHz, DMSO- $d_6$ ) of compound **2d**.

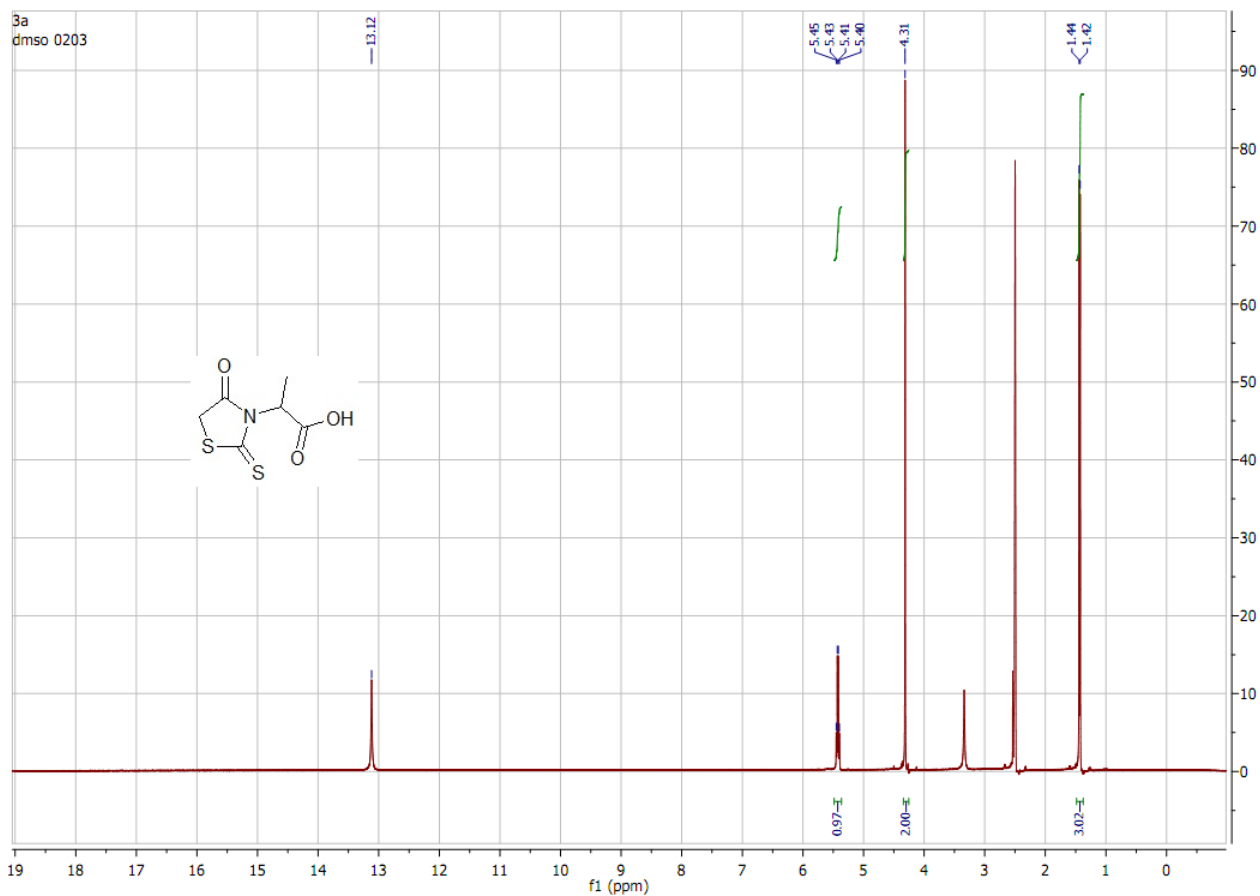

**Figure S5.**  $^1\text{H}$ NMR spectrum (400 MHz, DMSO- $d_6$ ) of compound **3a**.

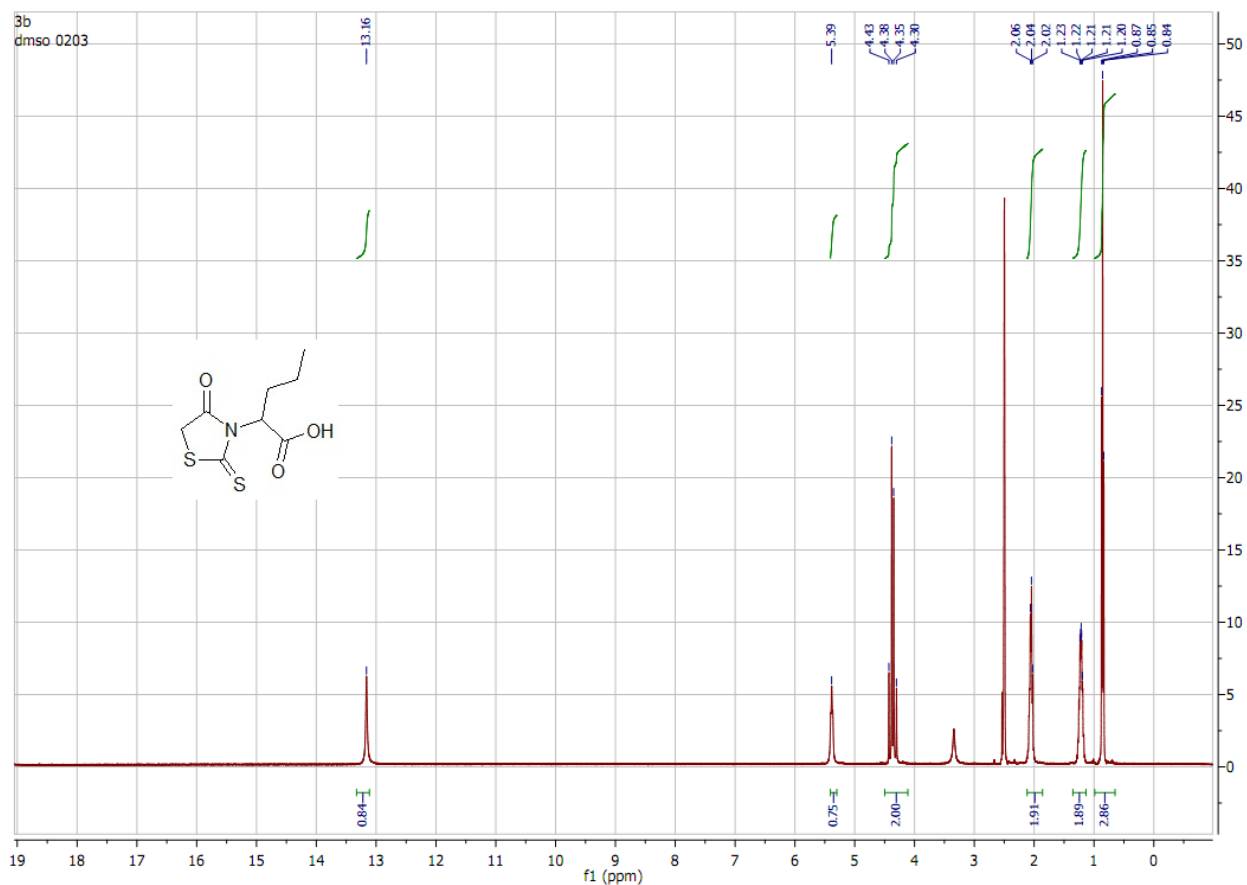

**Figure S6.**  $^1\text{H}$ NMR spectrum (400 MHz, DMSO- $d_6$ ) of compound **3b**.

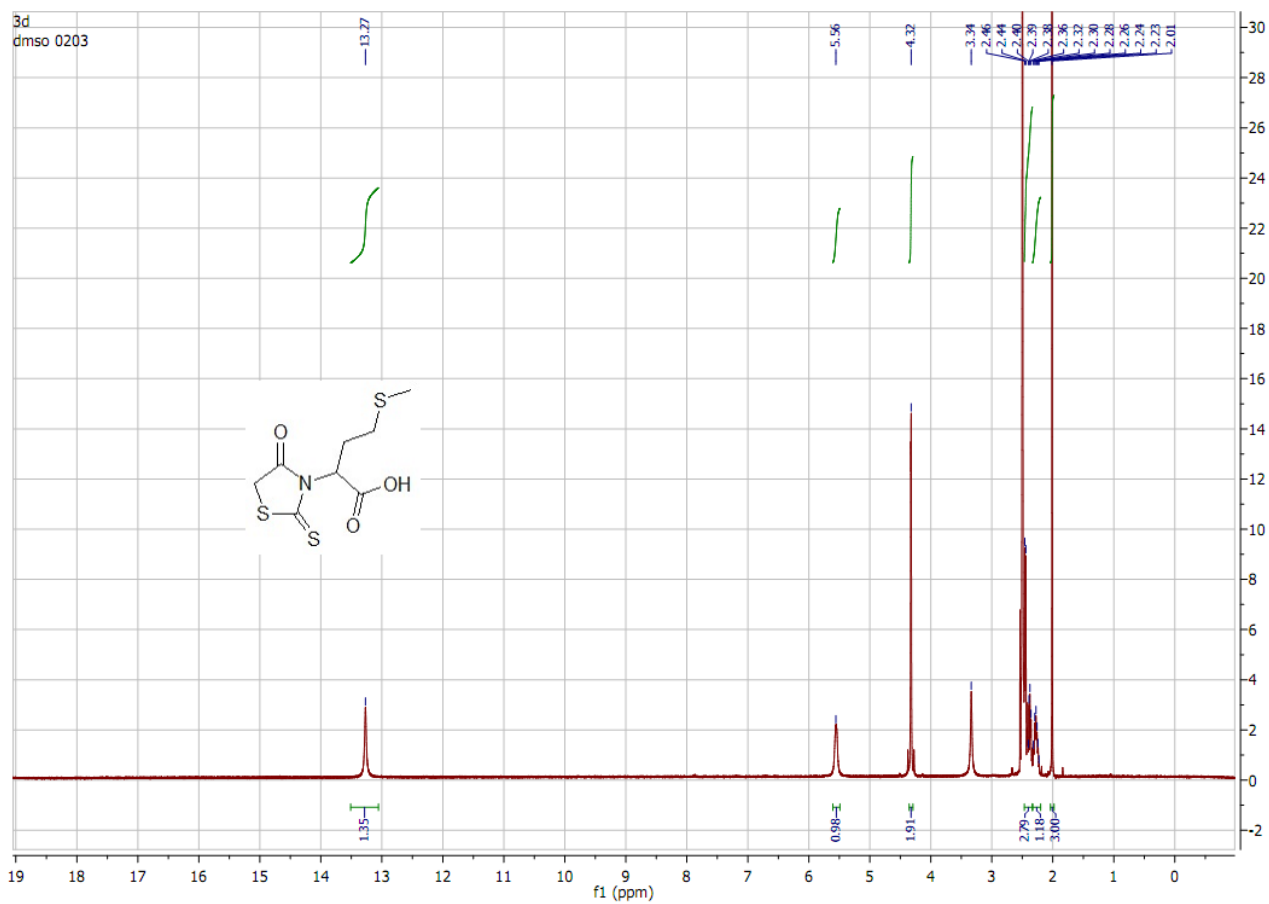

**Figure S7.**  $^1\text{H}$ NMR spectrum (400 MHz, DMSO- $\text{d}_6$ ) of compound 3c.

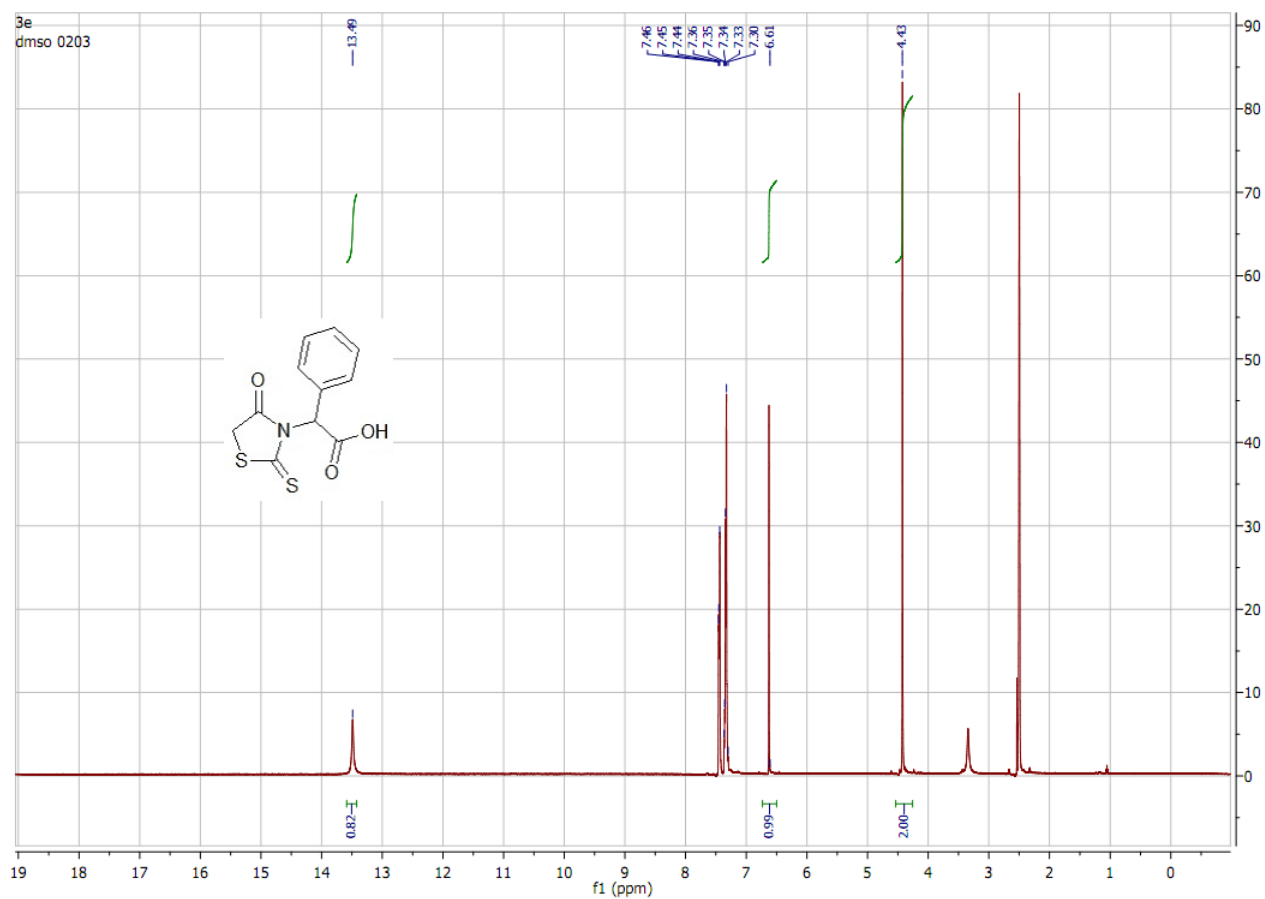

**Figure S8.**  $^1\text{H}$ NMR spectrum (400 MHz, DMSO- $\text{d}_6$ ) of compound 3d.

**Figure S9.**  $^1\text{H}$ NMR spectrum (400 MHz,  $\text{DMSO-d}_6$ ) of compound **3e**

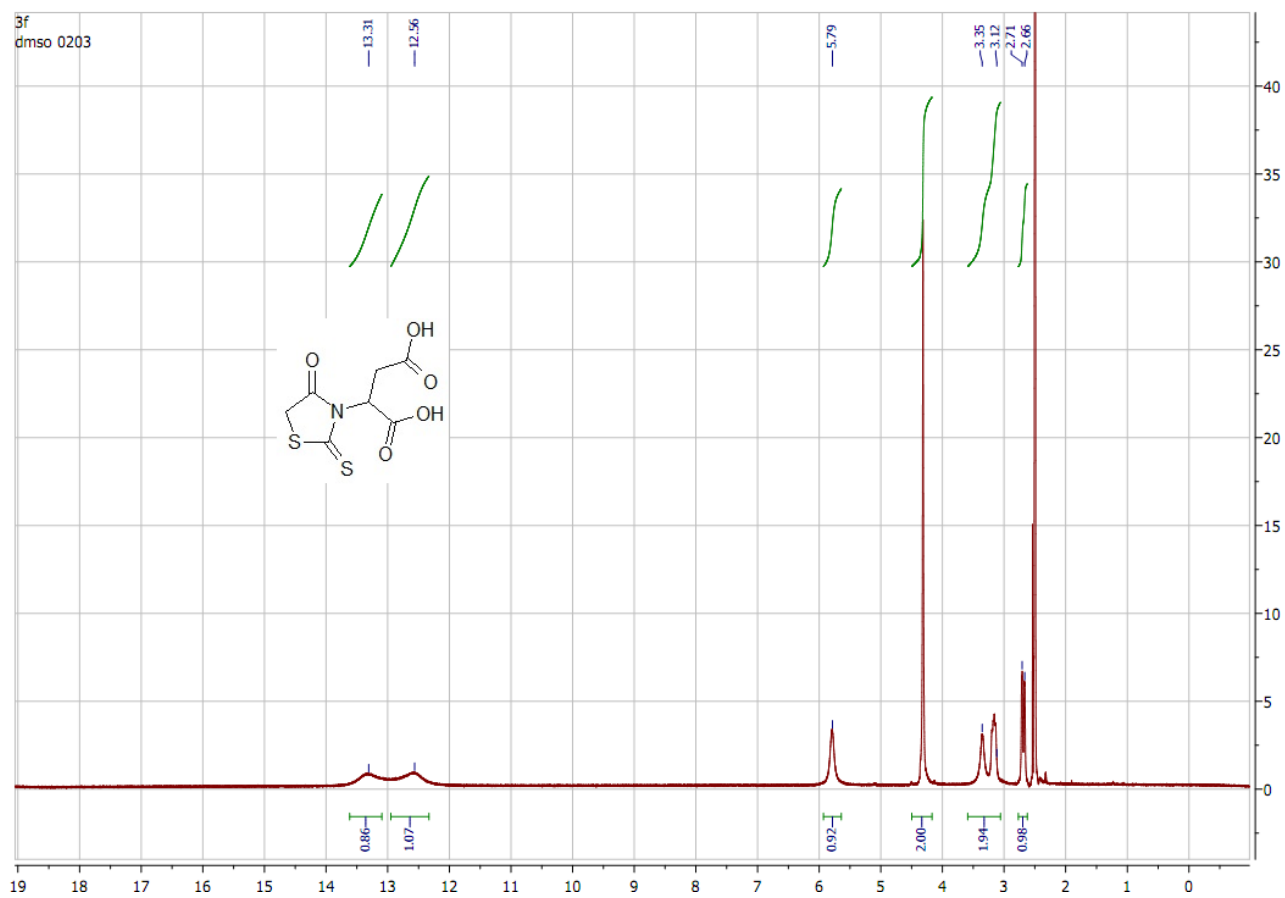

**Figure S10.**  $^1\text{H}$ NMR spectrum (400 MHz,  $\text{DMSO-d}_6$ ) of compound **3f**

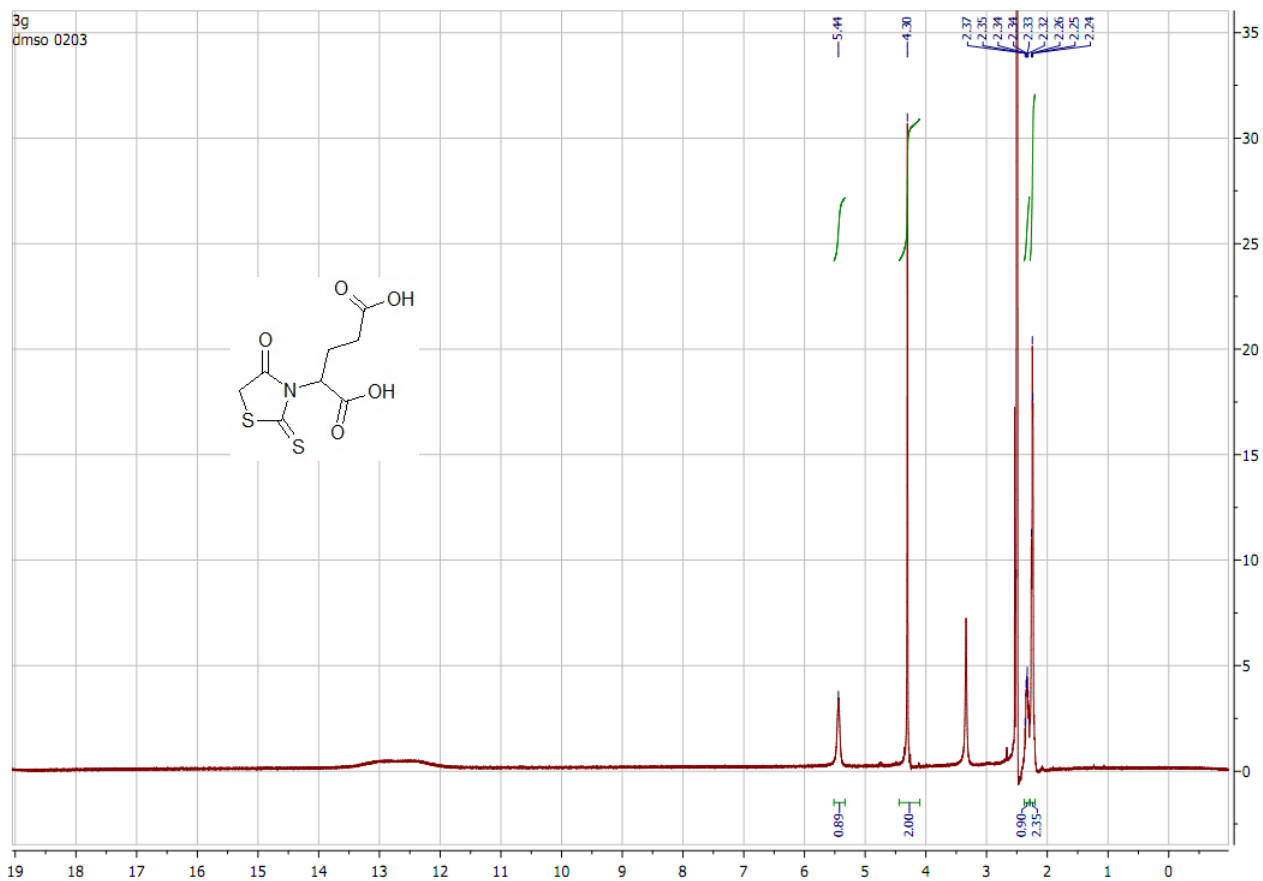

**Figure S11.**  $^1\text{H}$ NMR spectrum (400 MHz, DMSO- $d_6$ ) of compound **3g**

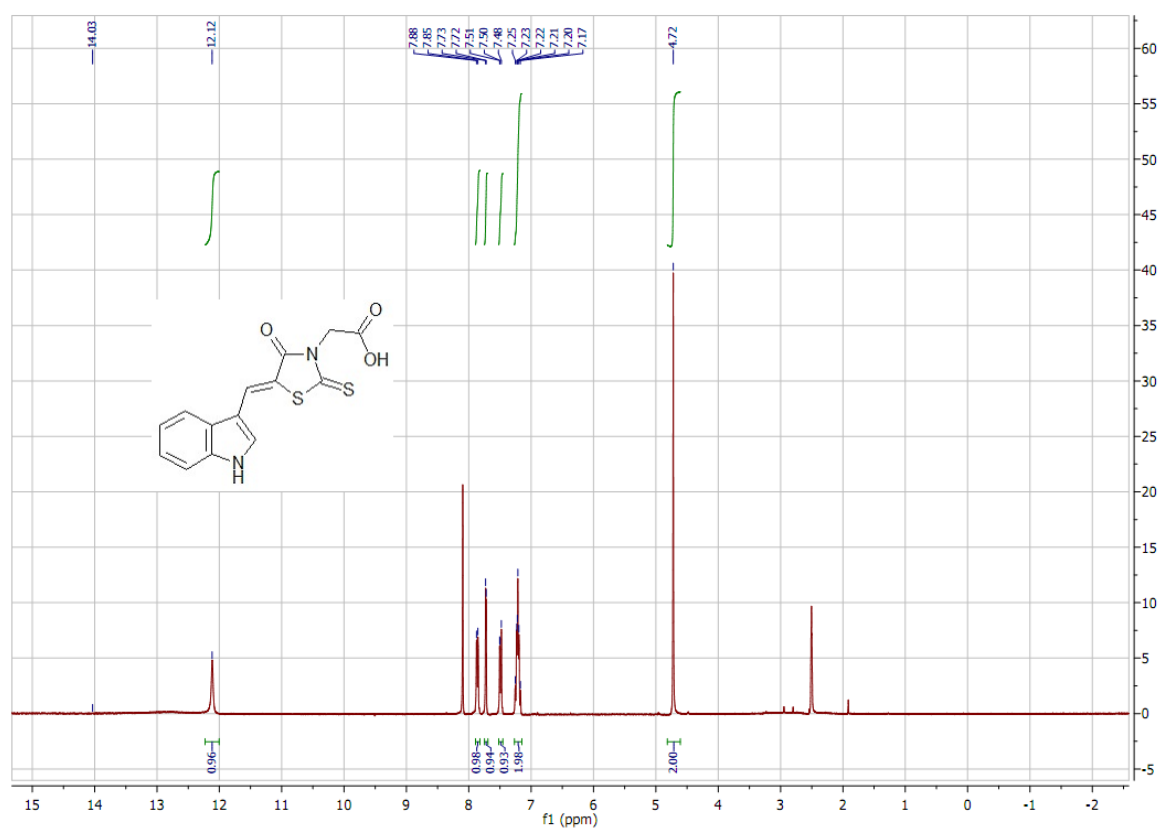

**Figure S12.**  $^1\text{H}$ NMR spectrum (300 MHz, DMSO- $d_6$ ) of compound **4a**.

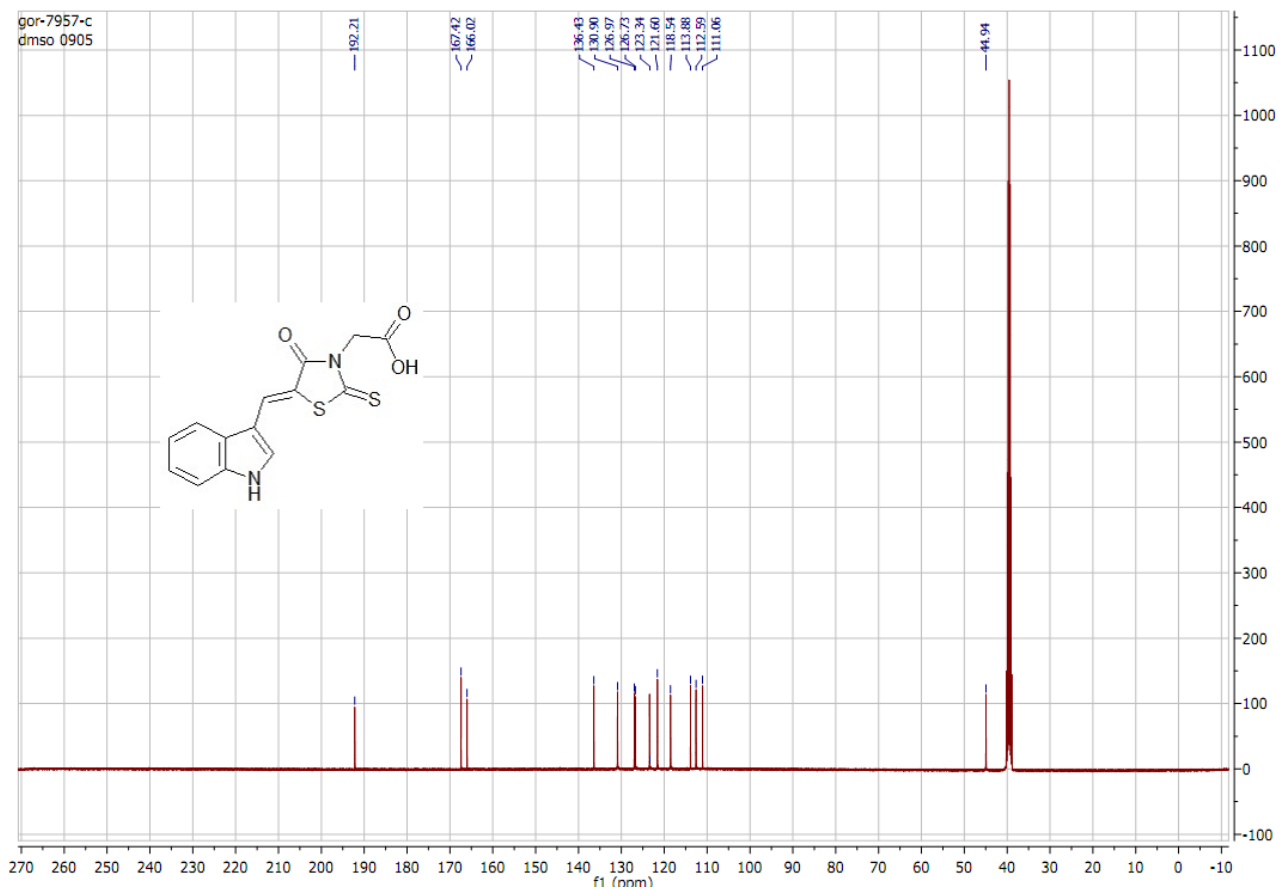

**Figure S13.**  $^{13}\text{C}$  NMR spectrum (101 MHz, DMSO- $\text{d}_6$ ) of compound **4a**



-o.-Syntex Purity Report -o.-

System: Agilent 1200 LC/MSD SL  
 Separation column: Rapid Resolution HT Cartige 4.6x30mm, 1.8-Micron, Zorbx SB-C18

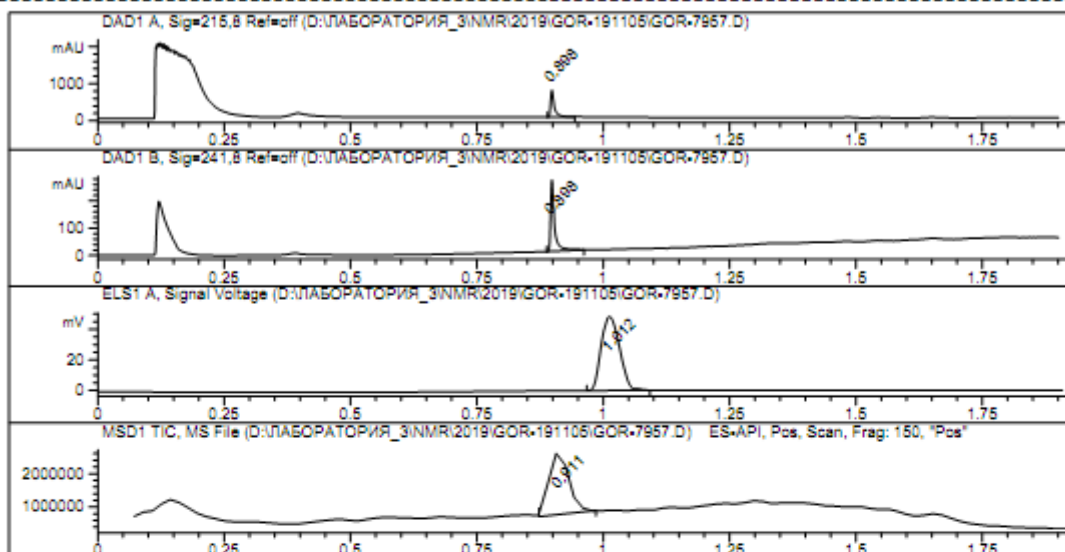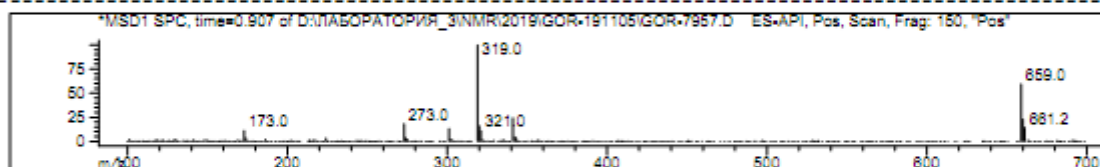

| # | Signal                    | R.Time | Area %  |
|---|---------------------------|--------|---------|
| 1 | DAD1 A, Sig=215,8 Ref=off | 0.898  | 100.000 |
| 1 | DAD1 B, Sig=241,8 Ref=off | 0.898  | 100.000 |
| 1 | ELS1 A, Signal Voltage    | 1.012  | 100.000 |
| 1 | MSD1 TIC, MS File         | 0.911  | 100.000 |

Inf. Data 05.11.2019

Figure S14. MS (ESI) spectrum of compound 4a.

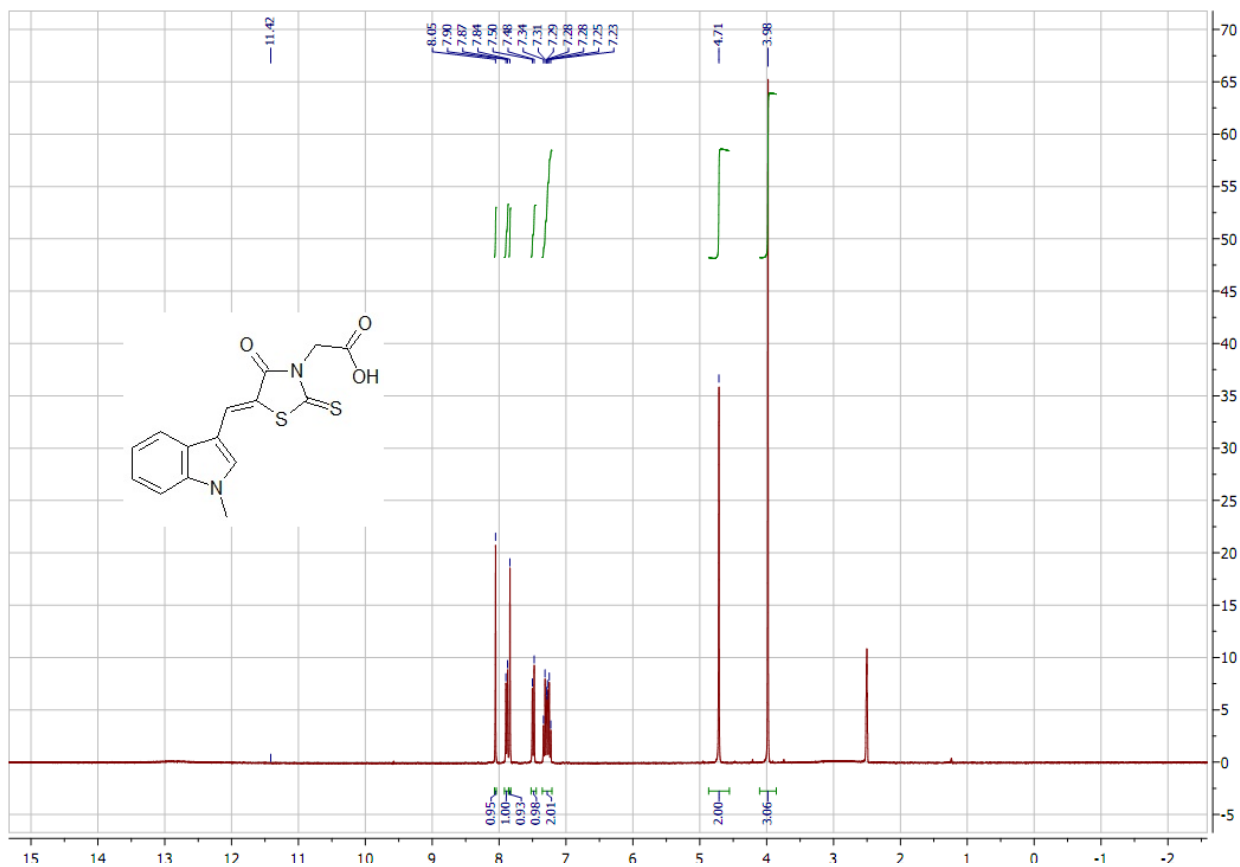

**Figure S15.** <sup>1</sup>H NMR spectrum (300 MHz, DMSO-d<sub>6</sub>) of compound **4b**.

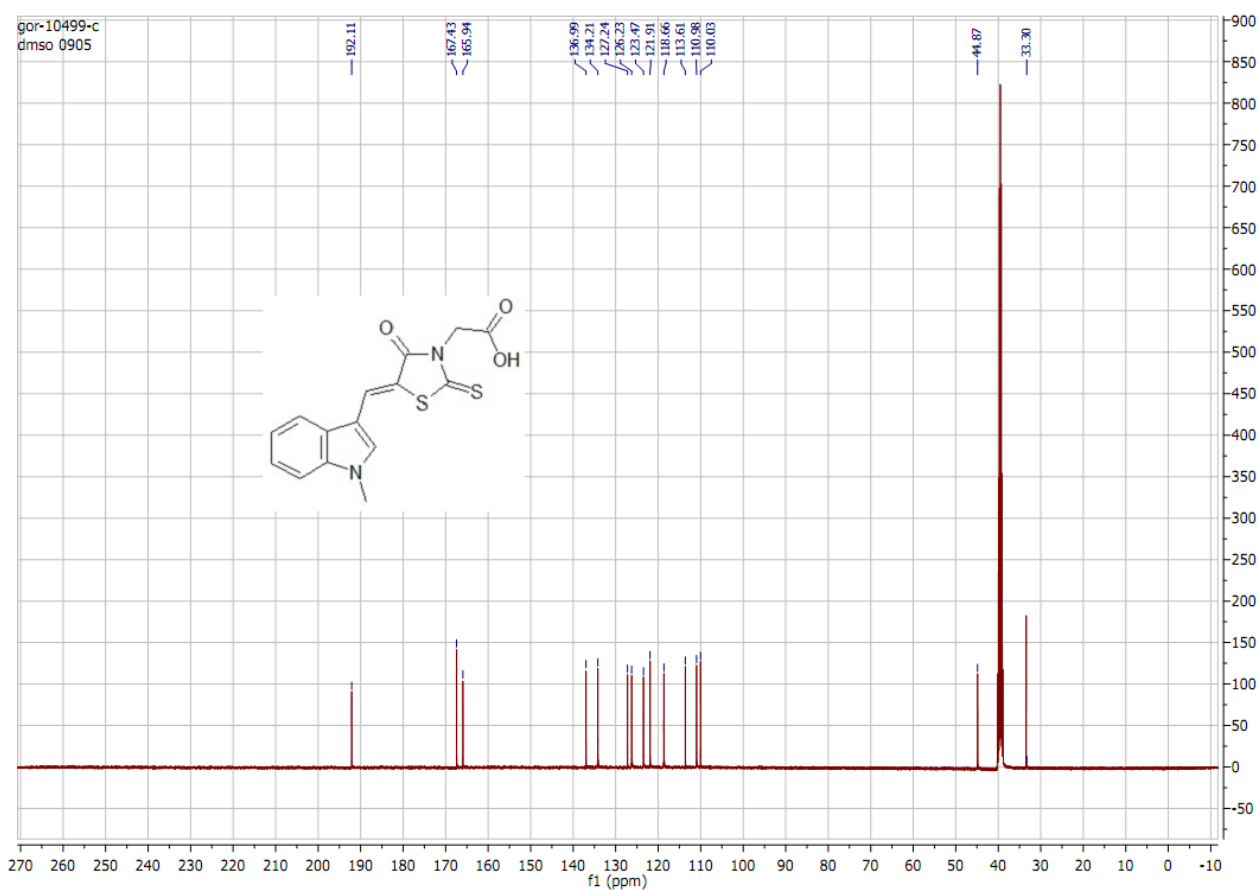

**Figure S16.** <sup>13</sup>C NMR spectrum (101 MHz, DMSO-d<sub>6</sub>) of compound **4b**.

System: Agilent 1200 LC/MSD SL  
 Separation column: Rapid Resolutionn HT Cartige 4.6x30mm, 1.8-Micron, Zorbx SB-C18

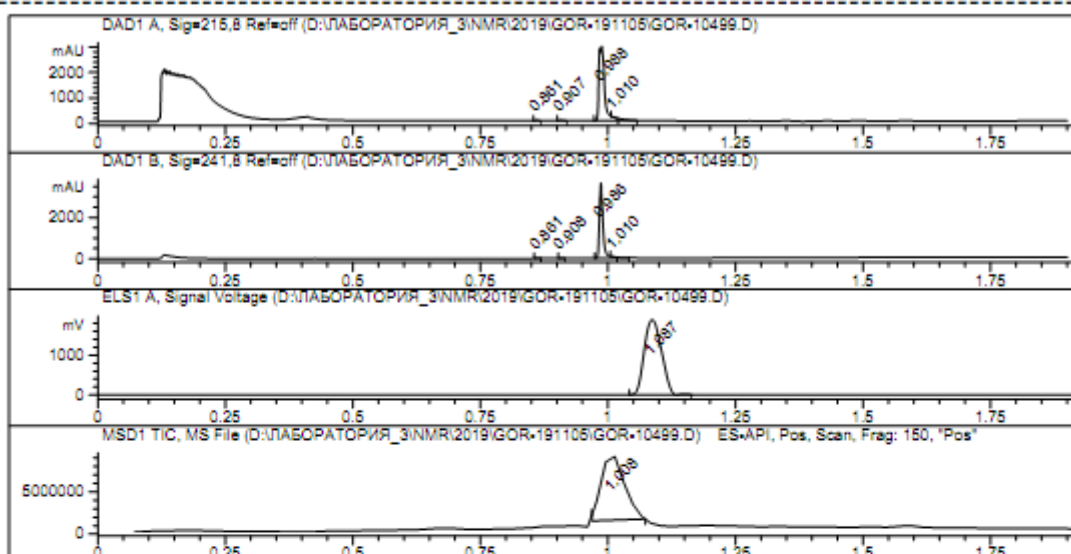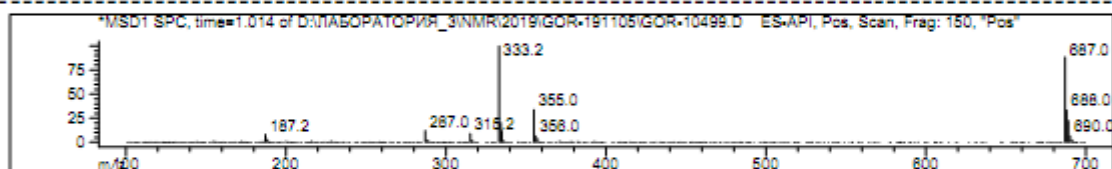

| # | Signal                    | R.Time | Area % |
|---|---------------------------|--------|--------|
| 1 | DAD1 A, Sig=215,8 Ref=off | 0.861  | 0.187  |
| 2 |                           | 0.907  | 0.508  |
| 3 |                           | 0.988  | 99.236 |
| 4 |                           | 1.010  | 0.069  |

  

| # | Signal                    | R.Time | Area % |
|---|---------------------------|--------|--------|
| 1 | DAD1 B, Sig=241,8 Ref=off | 0.861  | 0.311  |
| 2 |                           | 0.908  | 0.340  |
| 3 |                           | 0.986  | 98.967 |
| 4 |                           | 1.010  | 0.382  |

  

| # | Signal                 | R.Time | Area %  |
|---|------------------------|--------|---------|
| 1 | ELS1 A, Signal Voltage | 1.087  | 100.000 |

  

| # | Signal            | R.Time | Area %  |
|---|-------------------|--------|---------|
| 1 | MSD1 TIC, MS File | 1.008  | 100.000 |

Inj. Data 06.11.2019

**Figure S17.** MS (ESI) spectrum of compound **4b**.

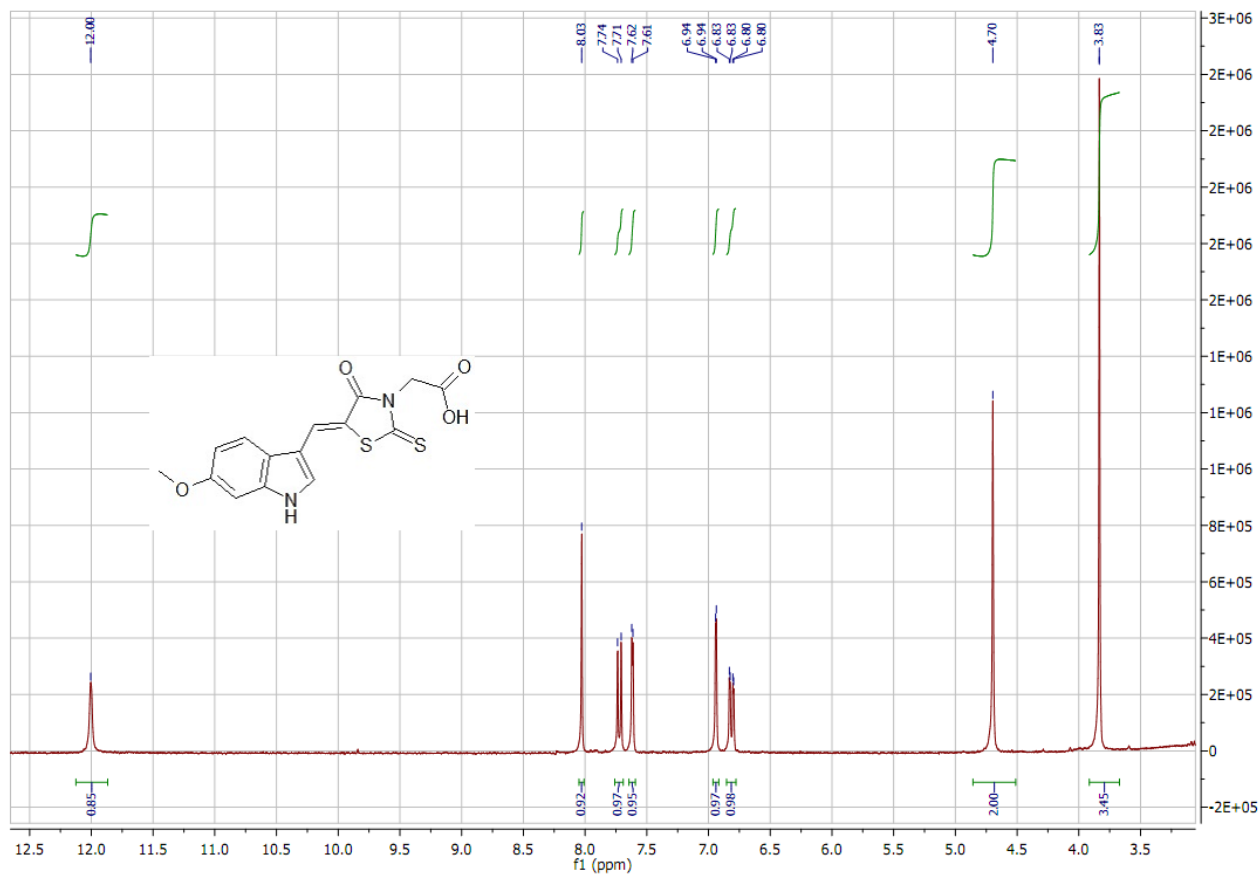

**Figure S18.**  $^1\text{H}$ NMR spectrum (300 MHz,  $\text{DMSO-d}_6$ ) of compound **4c**.

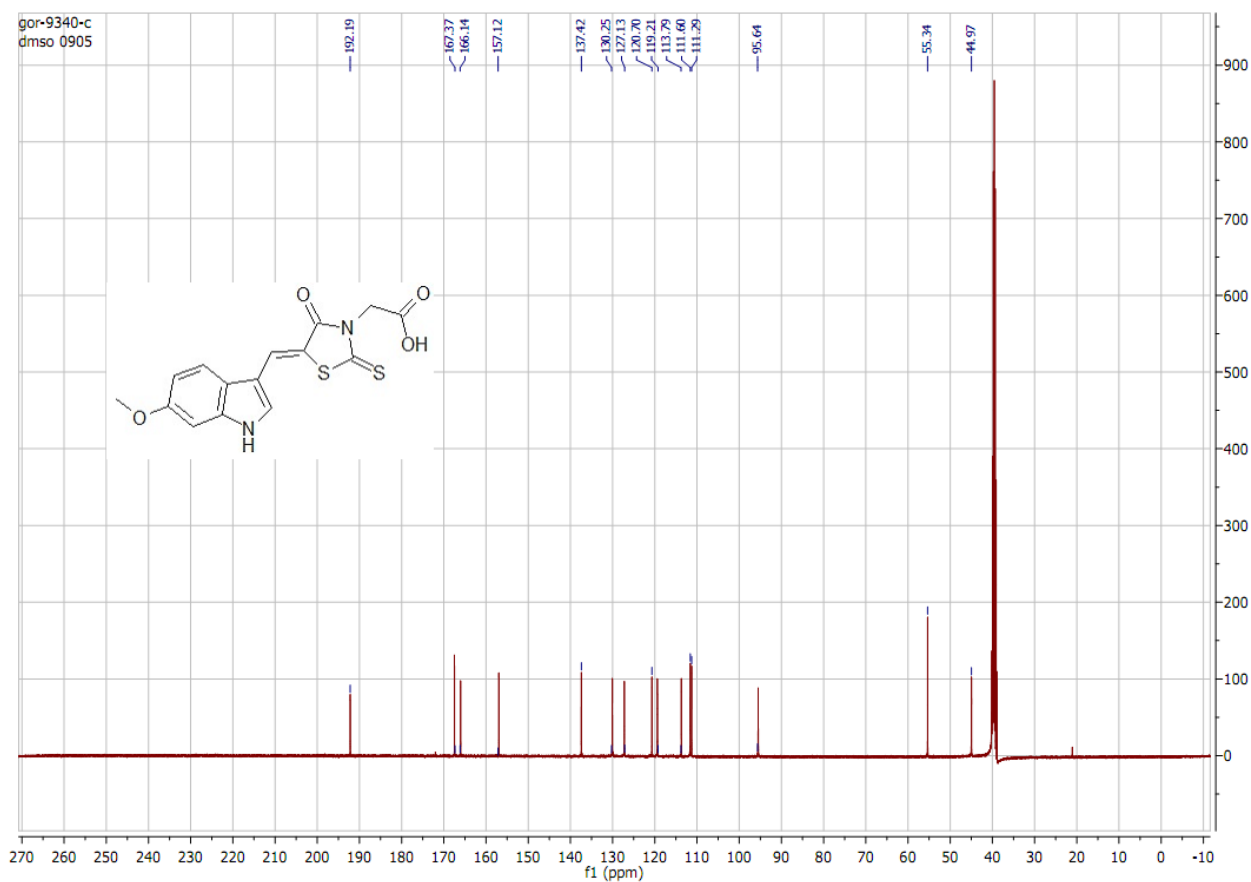

**Figure S19.**  $^{13}\text{C}$  NMR spectrum (101 MHz,  $\text{DMSO-d}_6$ ) of compound **4c**

System: Agilent 1200 LC/MSD SL  
 Separation column: Rapid Resolution HT Cartige 4.6x30mm, 1.8-Micron, Zorbx SB-C18

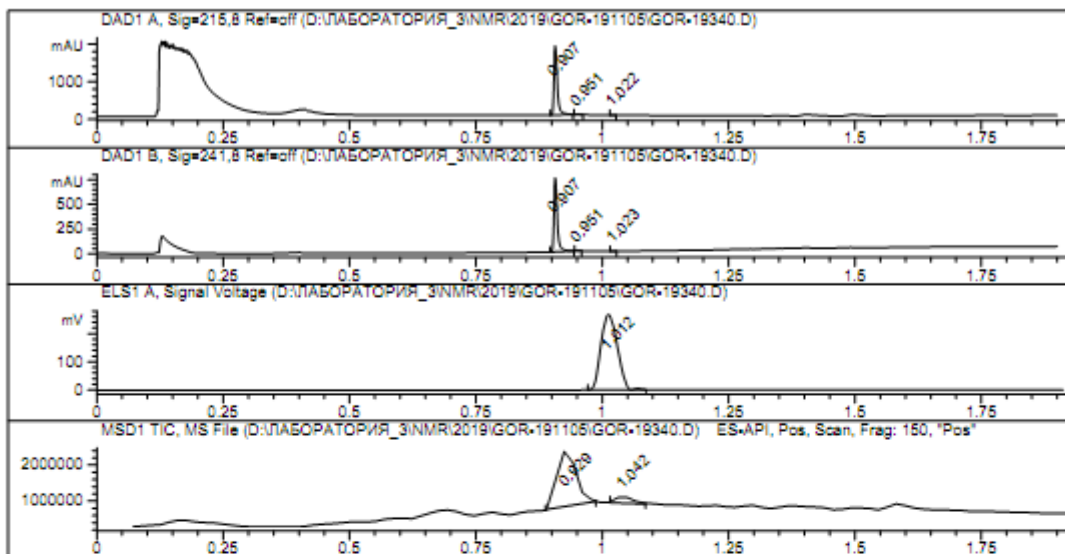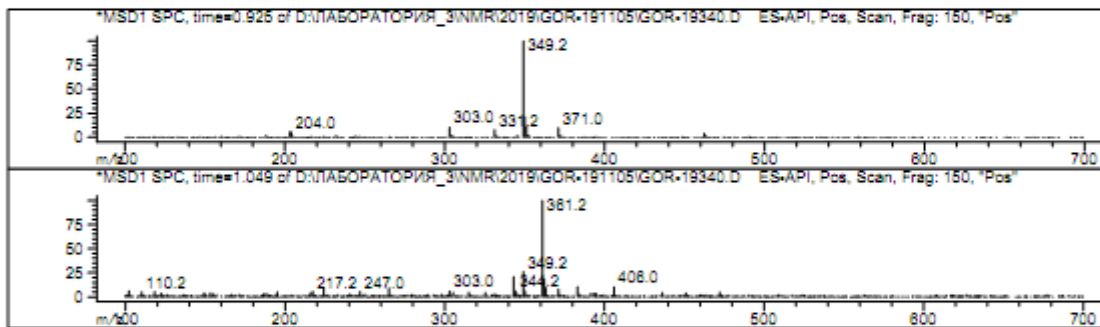

| #     | Signal                    | R.Time | Area %  |
|-------|---------------------------|--------|---------|
| 1     | DAD1 A, Sig=215,8 Ref=off | 0.907  | 98.924  |
| 2     |                           | 0.951  | 0.692   |
| 3     |                           | 1.022  | 0.384   |
| ----- |                           |        |         |
| #     | Signal                    | R.Time | Area %  |
| 1     | DAD1 B, Sig=241,8 Ref=off | 0.907  | 99.157  |
| 2     |                           | 0.951  | 0.412   |
| 3     |                           | 1.023  | 0.431   |
| ----- |                           |        |         |
| #     | Signal                    | R.Time | Area %  |
| 1     | ELS1 A, Signal Voltage    | 1.012  | 100.000 |
| ----- |                           |        |         |
| #     | Signal                    | R.Time | Area %  |
| 1     | MSD1 TIC, MS File         | 0.929  | 91.946  |
| 2     |                           | 1.042  | 8.054   |

Inj. Date 06.11.2019

**Figure S20.** MS (ESI) spectrum of compound **4c**.

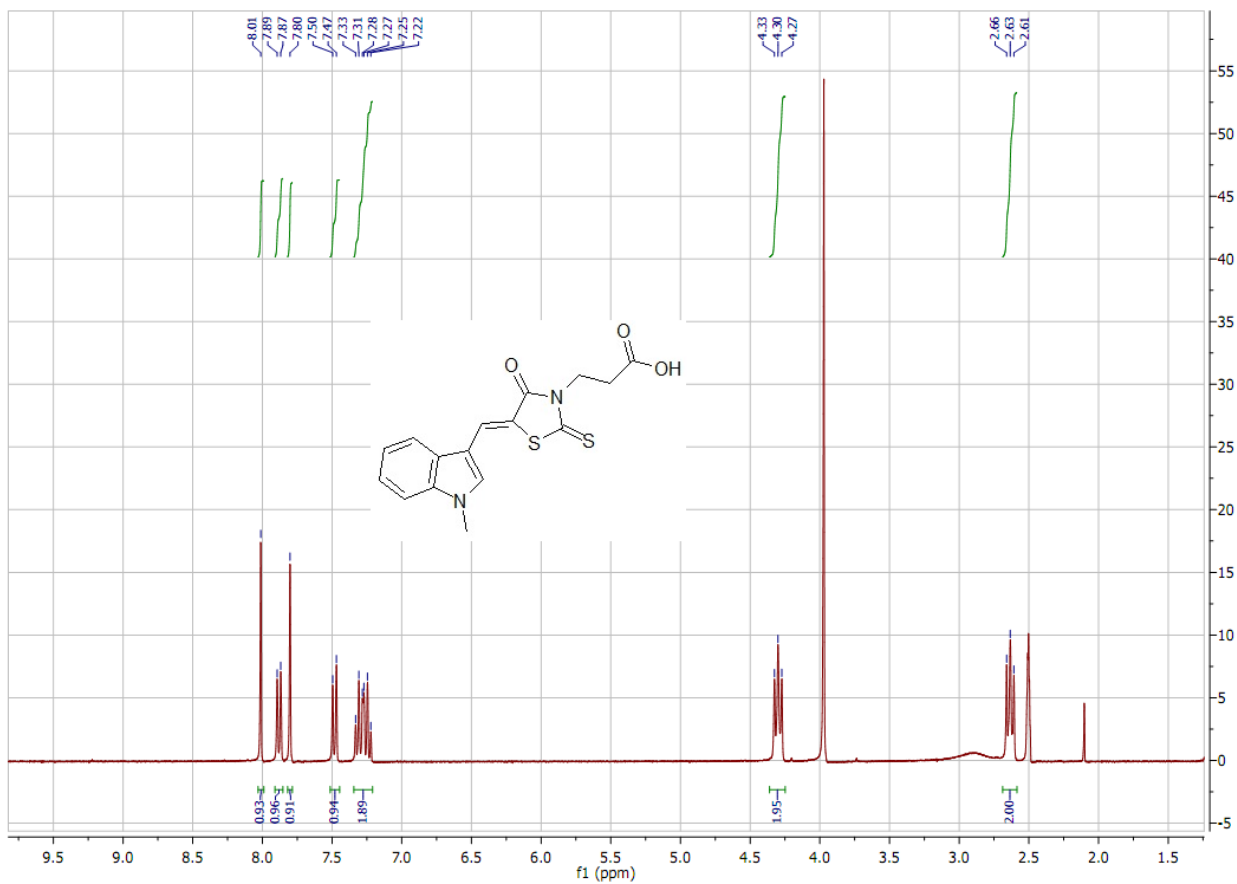

**Figure S21.**  $^1\text{H}$ NMR spectrum (300 MHz, DMSO- $d_6$ ) of compound **4d**.

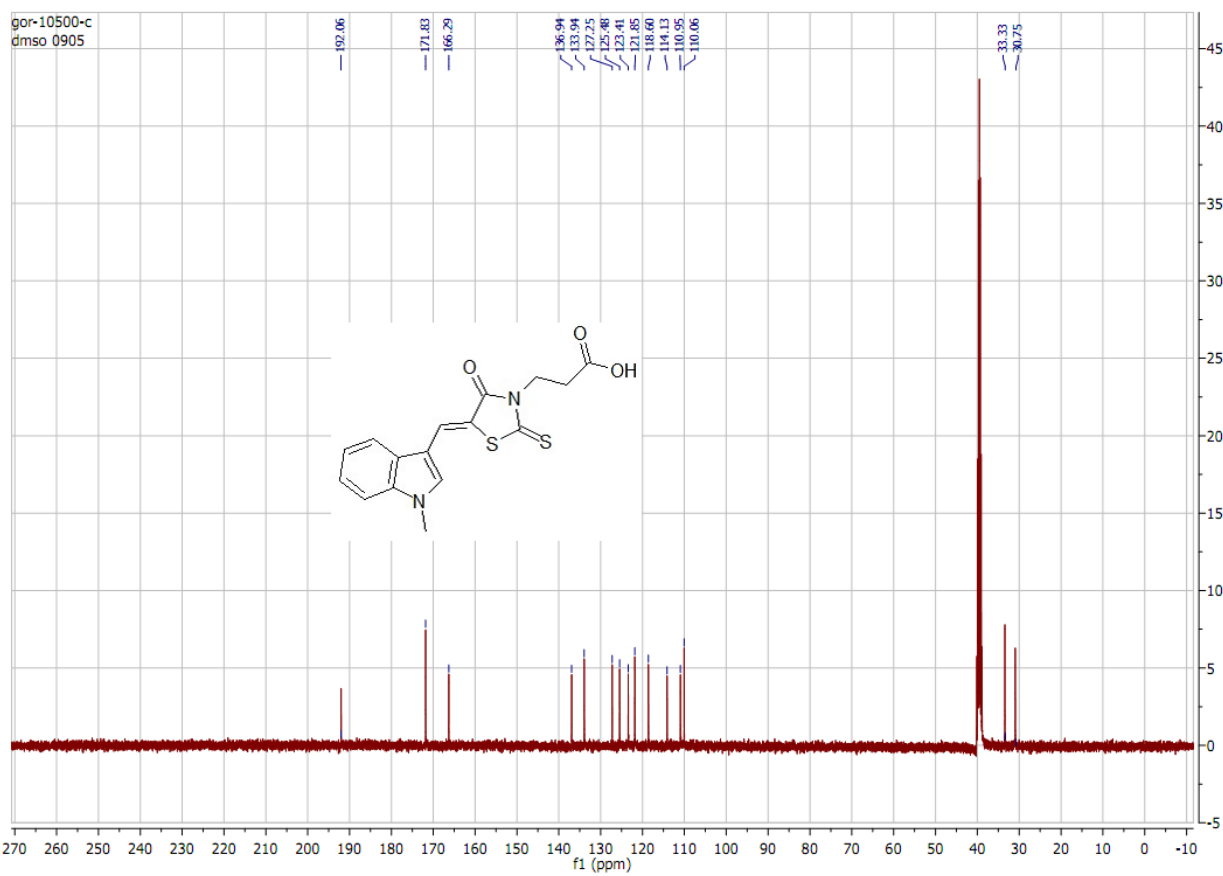

**Figure S22.**  $^{13}\text{C}$  NMR spectrum (101 MHz, DMSO- $d_6$ ) of compound **4d**

## -o.-Syntex Purity Report -o.-

System: Agilent 1200 LC/MSD SL

Separation column: Rapid Resolution HT Cartige 4.6x30mm, 1.8-Micron, Zorbx SB-C18

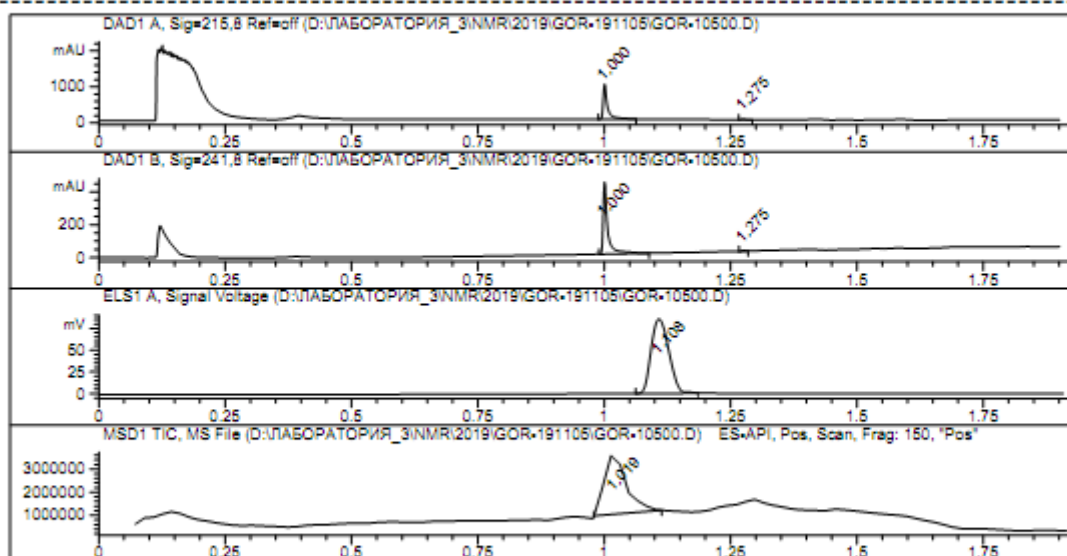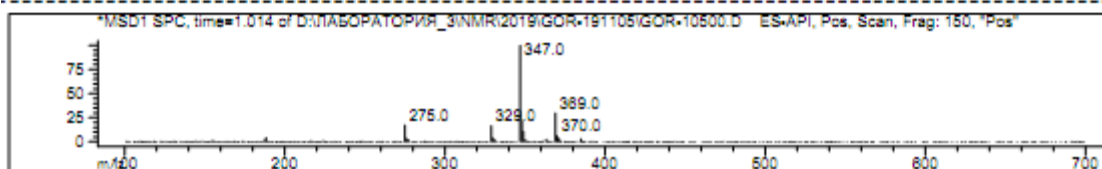

| # | Signal                    | R.Time | Area %  |
|---|---------------------------|--------|---------|
| 1 | DAD1 A, Sig=215,8 Ref=off | 1.000  | 98.591  |
| 2 |                           | 1.275  | 1.409   |
| # | Signal                    | R.Time | Area %  |
| 1 | DAD1 B, Sig=241,8 Ref=off | 1.000  | 98.971  |
| 2 |                           | 1.275  | 1.029   |
| # | Signal                    | R.Time | Area %  |
| 1 | ELS1 A, Signal Voltage    | 1.108  | 100.000 |
| # | Signal                    | R.Time | Area %  |
| 1 | MSD1 TIC, MS File         | 1.019  | 100.000 |

inj. Data 05.11.2019

Figure S23. MS (ESI) spectrum of compound 4d.

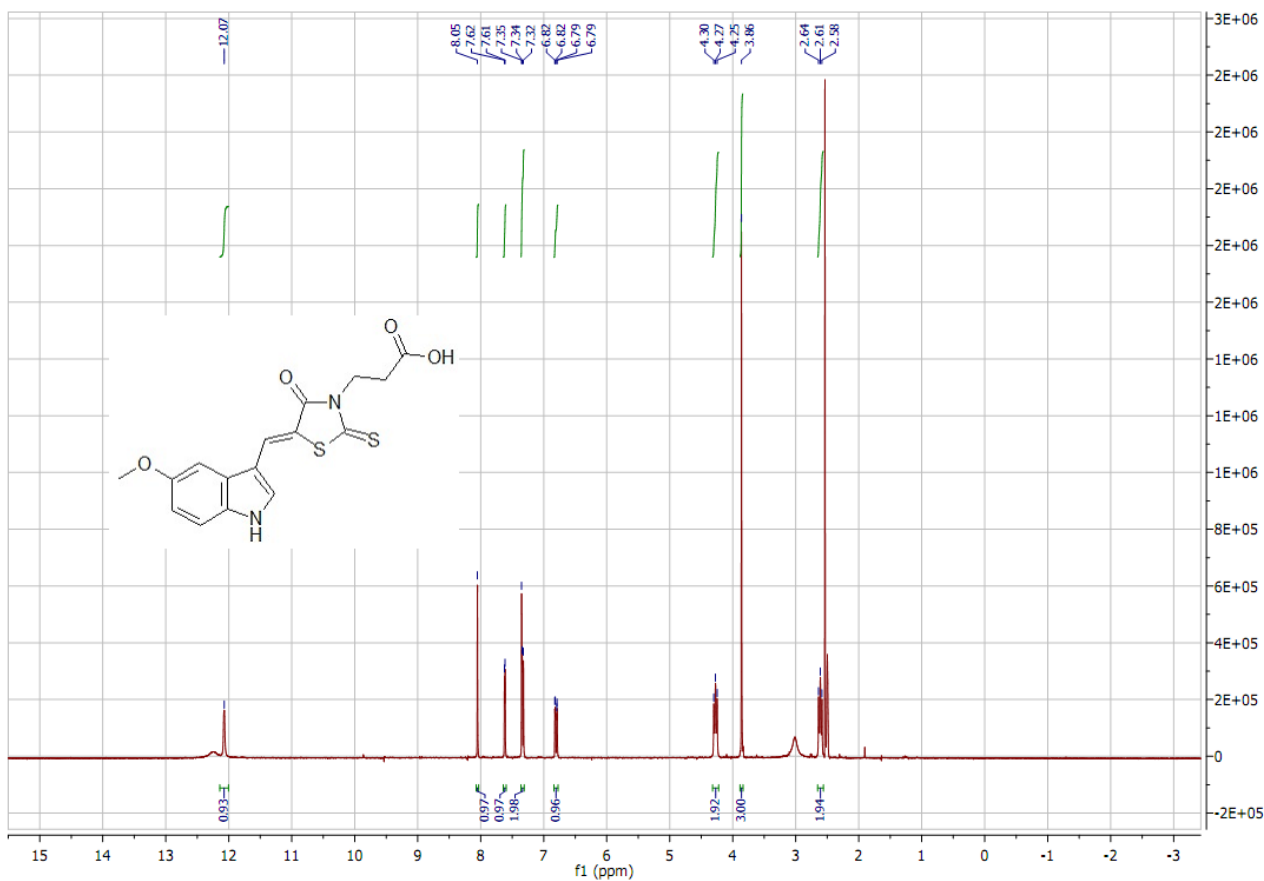

**Figure S24.**  $^1\text{H}$ NMR spectrum (300 MHz,  $\text{DMSO-d}_6$ ) of compound 4e.

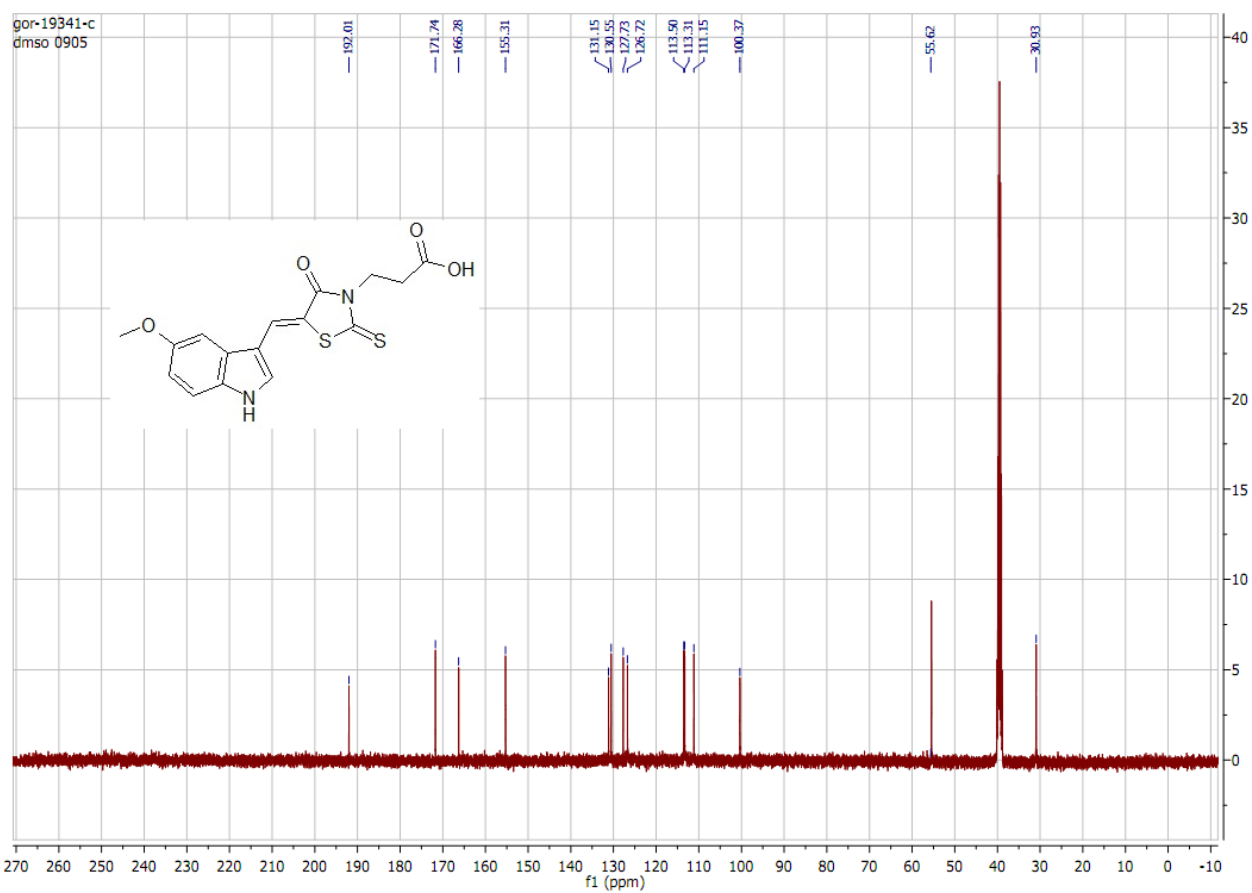

**Figure S25.**  $^{13}\text{C}$  NMR spectrum (101 MHz,  $\text{DMSO-d}_6$ ) of compound 4d



-o.-Synzetx Purity Report -o.-

System: Agilent 1200 LC/MSD SL  
 Separation column: Rapid Resolution HT Cartige 4.6x30mm, 1.8-Micron, Zorbx SB-C18

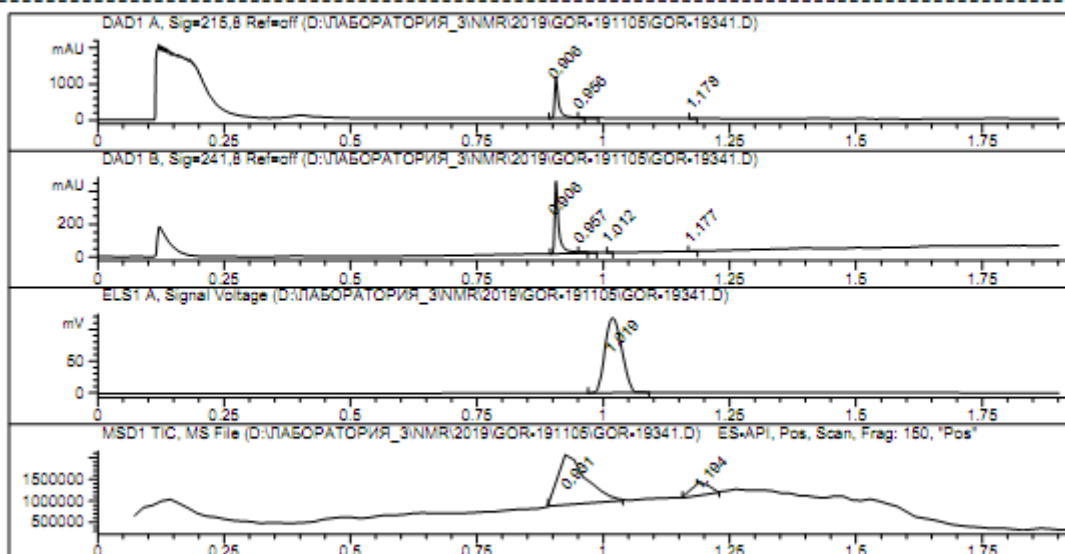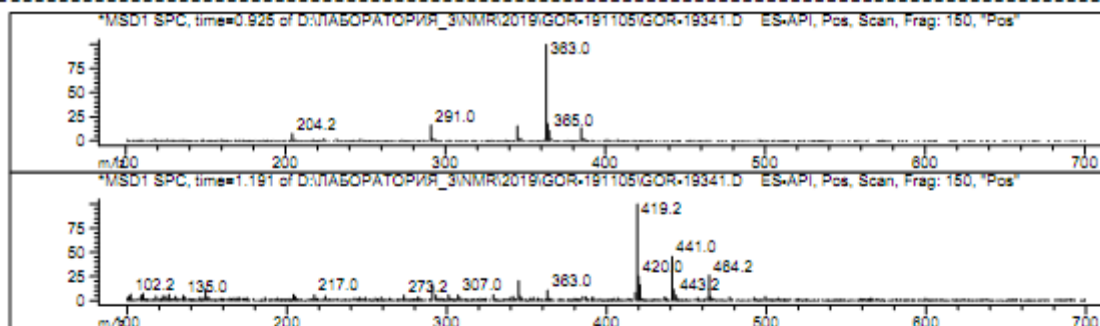

| #     | Signal                    | R.Time | Area %  |
|-------|---------------------------|--------|---------|
| 1     | DAD1 A, Sig=215,8 Ref=off | 0.906  | 98.540  |
| 2     |                           | 0.956  | 0.434   |
| 3     |                           | 1.178  | 1.026   |
| ----- |                           |        |         |
| #     | Signal                    | R.Time | Area %  |
| 1     | DAD1 B, Sig=241,8 Ref=off | 0.906  | 98.127  |
| 2     |                           | 0.957  | 0.795   |
| 3     |                           | 1.012  | 0.310   |
| 4     |                           | 1.177  | 0.768   |
| ----- |                           |        |         |
| #     | Signal                    | R.Time | Area %  |
| 1     | ELS1 A, Signal Voltage    | 1.019  | 100.000 |
| ----- |                           |        |         |
| #     | Signal                    | R.Time | Area %  |
| 1     | MSD1 TIC, MS File         | 0.931  | 86.775  |
| 2     |                           | 1.194  | 13.225  |

Inj. Data 05.11.2019

Figure S26. MS (ESI) spectrum of compound 4e.

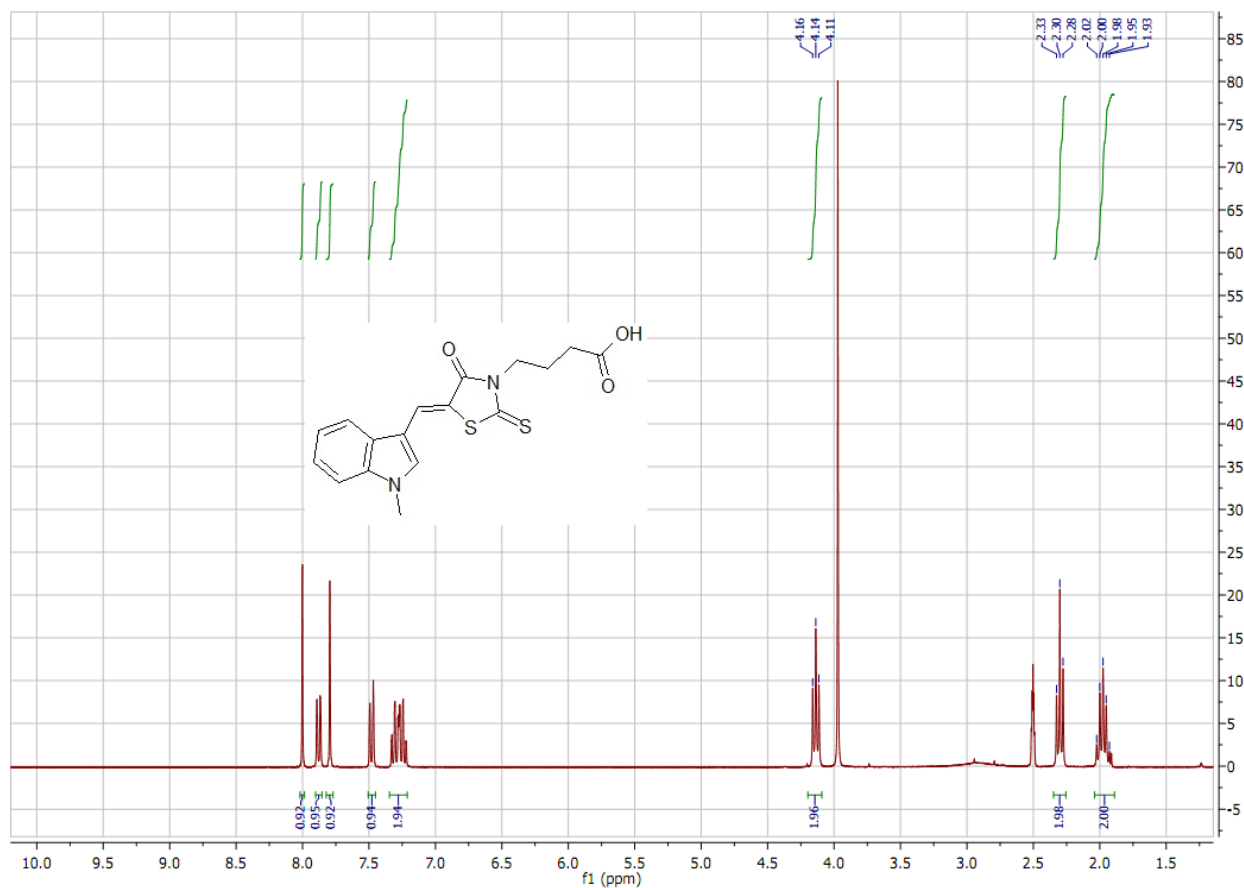

**Figure S27.**  $^1\text{H}$ NMR spectrum (300 MHz,  $\text{DMSO-d}_6$ ) of compound **4f**.

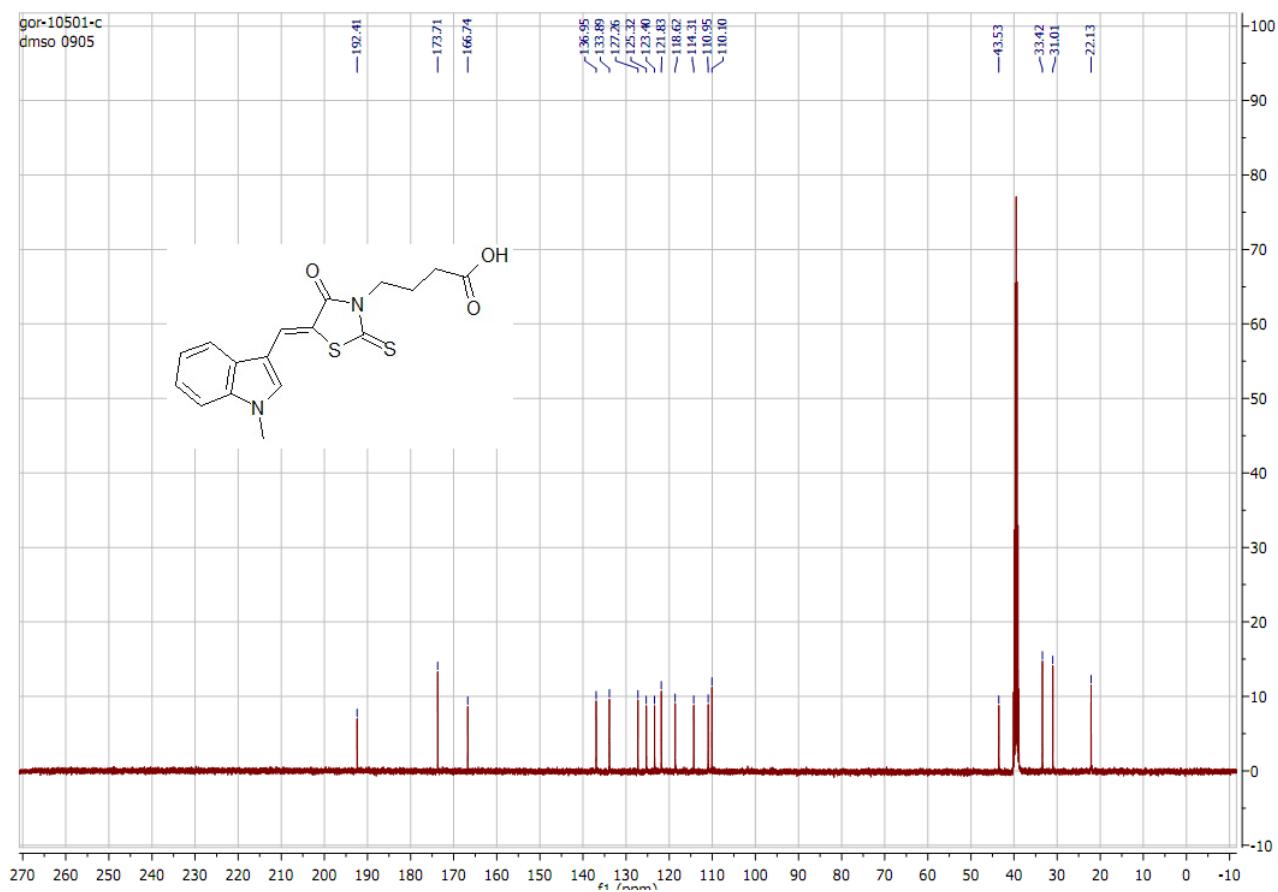

**Figure S28.**  $^{13}\text{C}$  NMR spectrum (101 MHz,  $\text{DMSO-d}_6$ ) of compound **4f**.

-o.-Syntex Purity Report -o.-

System: Agilent 1200 LC/MSD SL

Separation column: Rapid Resolution HT Cartige 4.6x30mm, 1.8-Micron, Zorbx SB-C18

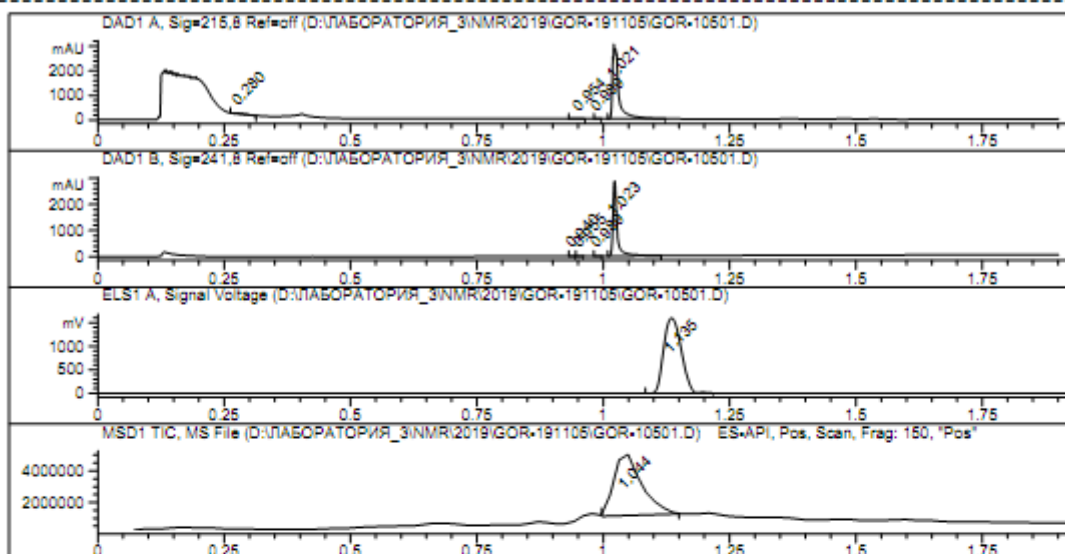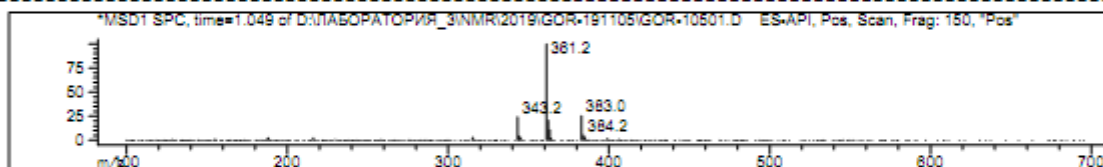

| # | Signal                    | R.Time | Area % |
|---|---------------------------|--------|--------|
| 1 | DAD1 A, Sig=215,8 Ref=off | 0.280  | 1.868  |
| 2 |                           | 0.954  | 0.299  |
| 3 |                           | 0.989  | 0.128  |
| 4 |                           | 1.021  | 97.706 |

  

| # | Signal                    | R.Time | Area % |
|---|---------------------------|--------|--------|
| 1 | DAD1 B, Sig=241,8 Ref=off | 0.940  | 0.068  |
| 2 |                           | 0.955  | 0.092  |
| 3 |                           | 0.989  | 0.139  |
| 4 |                           | 1.023  | 99.701 |

  

| # | Signal                 | R.Time | Area %  |
|---|------------------------|--------|---------|
| 1 | ELS1 A, Signal Voltage | 1.135  | 100.000 |

  

| # | Signal            | R.Time | Area %  |
|---|-------------------|--------|---------|
| 1 | MSD1 TIC, MS File | 1.044  | 100.000 |

Inj. Data 06.11.2019

Figure S29. MS (ESI) spectrum of compound **4f**.

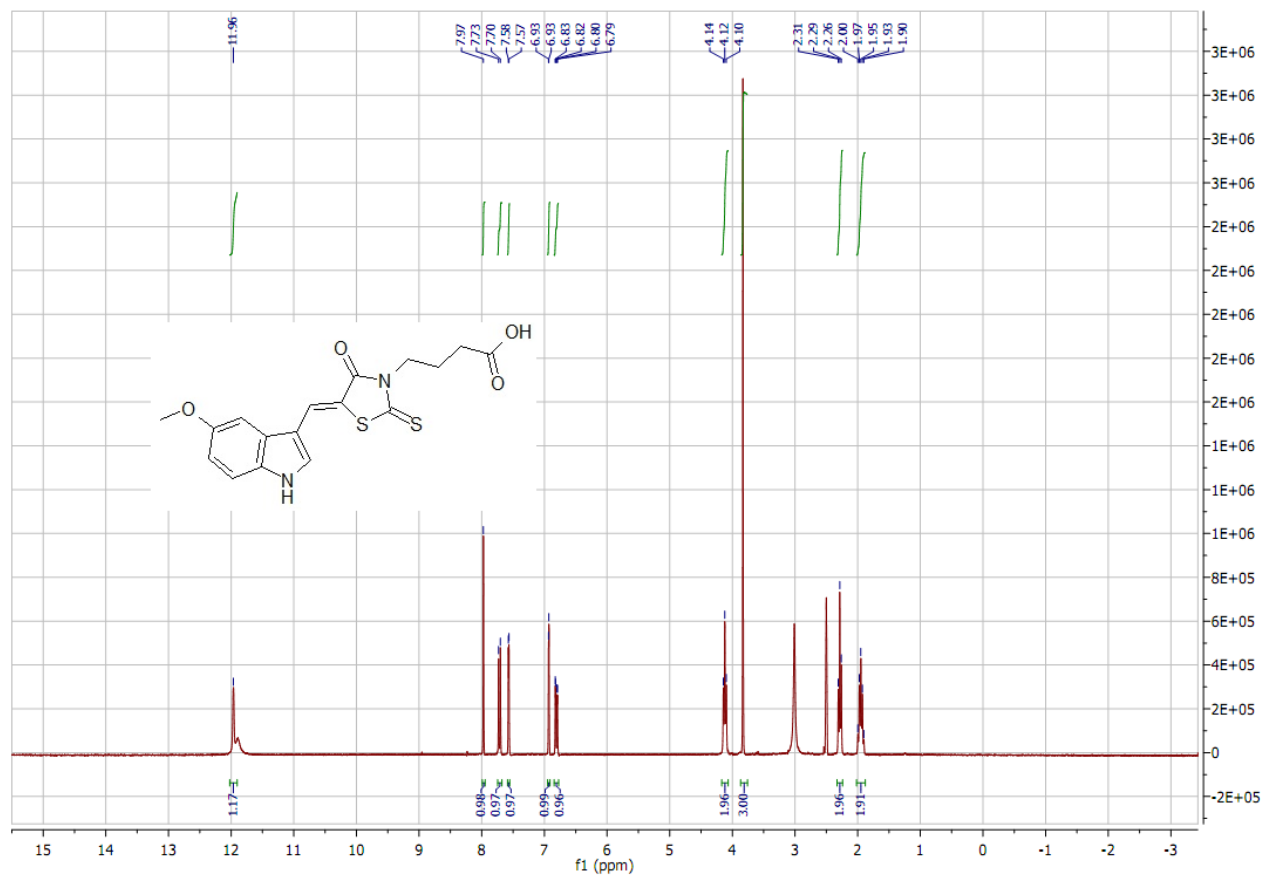

**Figure S30.**  $^1\text{H}$ NMR spectrum (300 MHz,  $\text{DMSO-d}_6$ ) of compound **4g**.

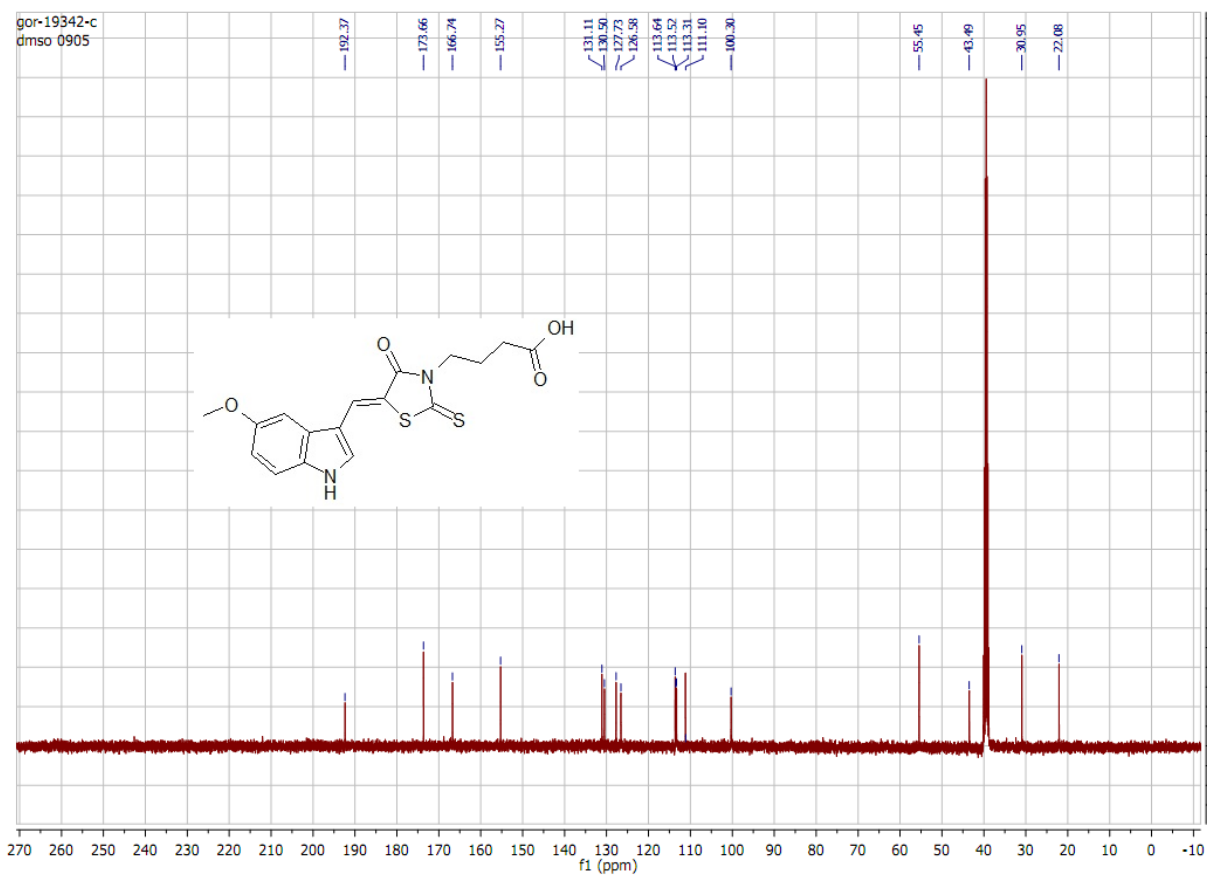

**Figure S31.**  $^{13}\text{C}$  NMR spectrum (101 MHz,  $\text{DMSO-d}_6$ ) of compound **4g**.

-o.-Synthes Purity Report -o.-

System: Agilent 1200 LC/MSD SL  
 Separation column: Rapid Resolution HT Cartige 4.6x30mm, 1.8-Micron, Zorbax SB-C18

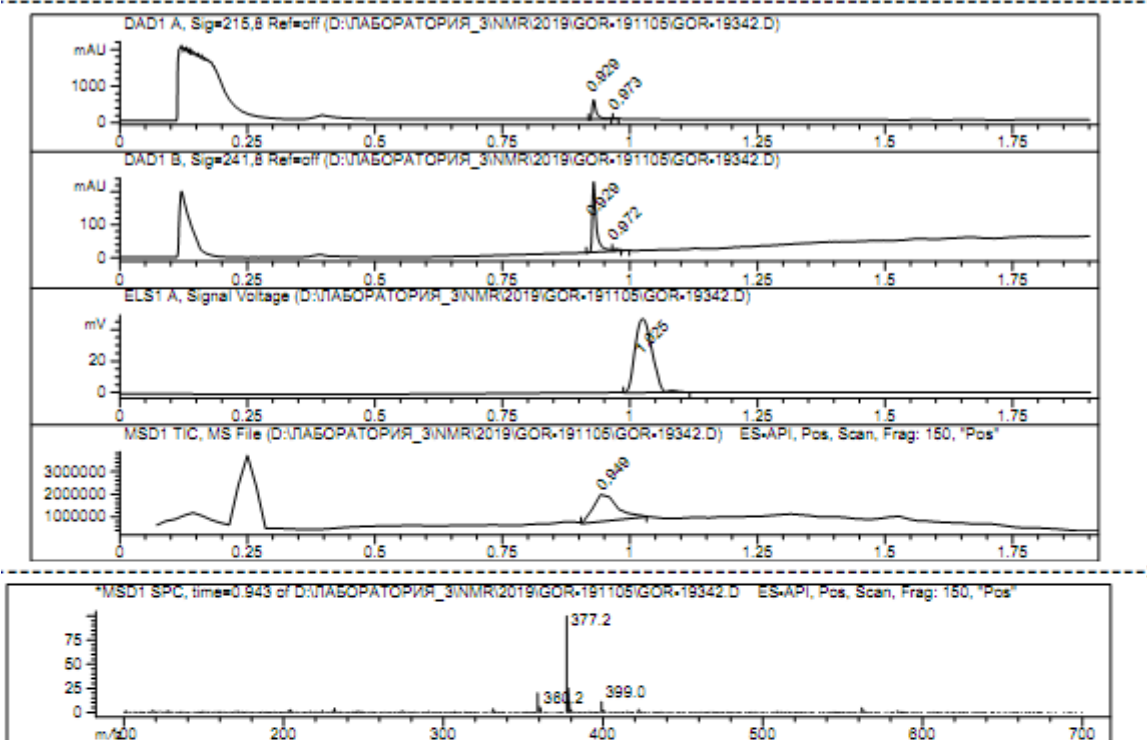

| # | Signal                    | R.Time | Area %  |
|---|---------------------------|--------|---------|
| 1 | DAD1 A, Sig=215,8 Ref=off | 0.929  | 99.533  |
| 2 |                           | 0.973  | 0.467   |
| # | Signal                    | R.Time | Area %  |
| 1 | DAD1 B, Sig=241,8 Ref=off | 0.929  | 98.942  |
| 2 |                           | 0.972  | 1.058   |
| # | Signal                    | R.Time | Area %  |
| 1 | ELS1 A, Signal Voltage    | 1.025  | 100.000 |
| # | Signal                    | R.Time | Area %  |
| 1 | MSD1 TIC, MS File         | 0.949  | 100.000 |

inj. Date 05.11.2019

Figure S32. MS (ESI) spectrum of compound 4g.

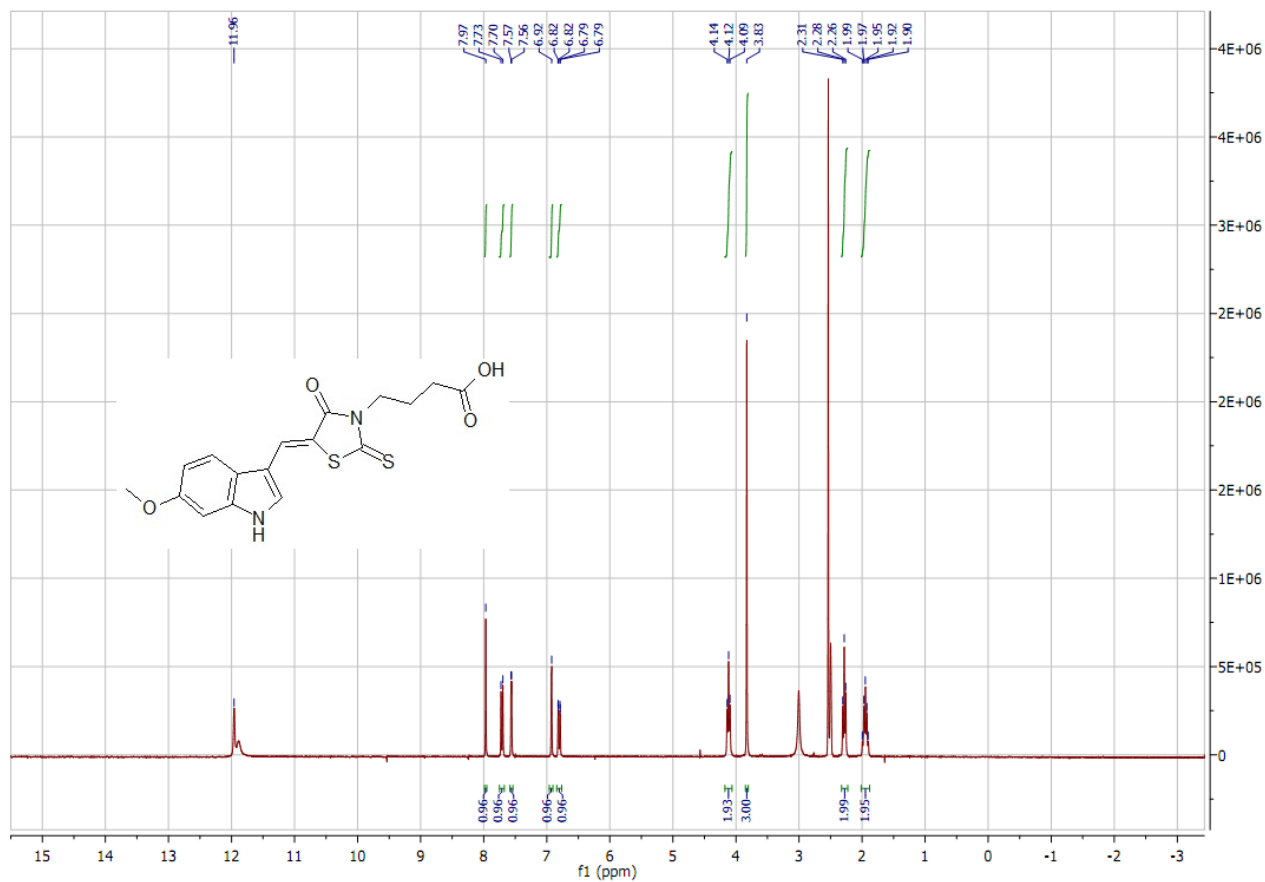

**Figure S33.**  $^1\text{H}$ NMR spectrum (300 MHz,  $\text{DMSO-d}_6$ ) of compound **4h**.

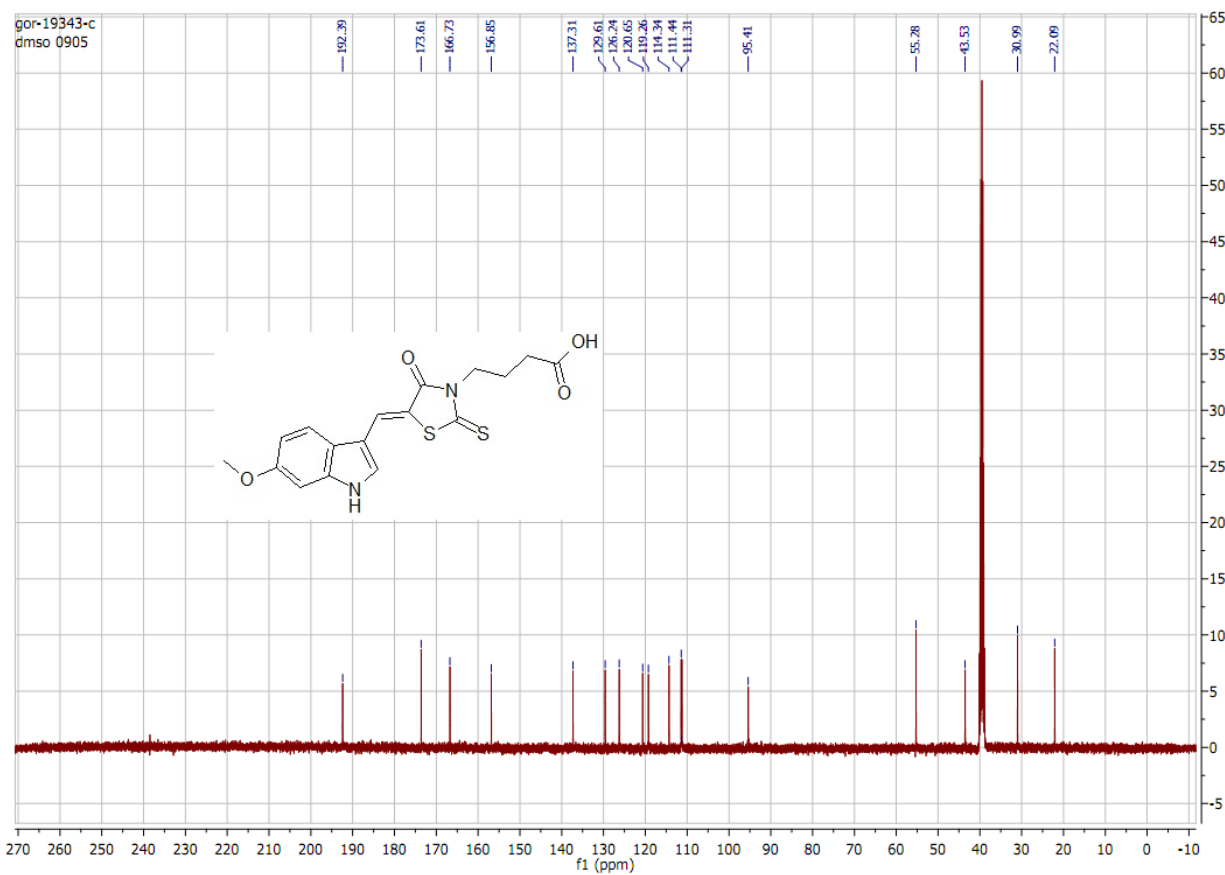

**Figure S34.**  $^{13}\text{C}$  NMR spectrum (101 MHz,  $\text{DMSO-d}_6$ ) of compound **4h**.

-o.-Syntez Purity Report -o.-

System: Agilent 1200 LC/MSD SL  
 Separation column: Rapid Resolution HT Cartidge 4.6x30mm, 1.8-Micron, Zorbx SB-C18

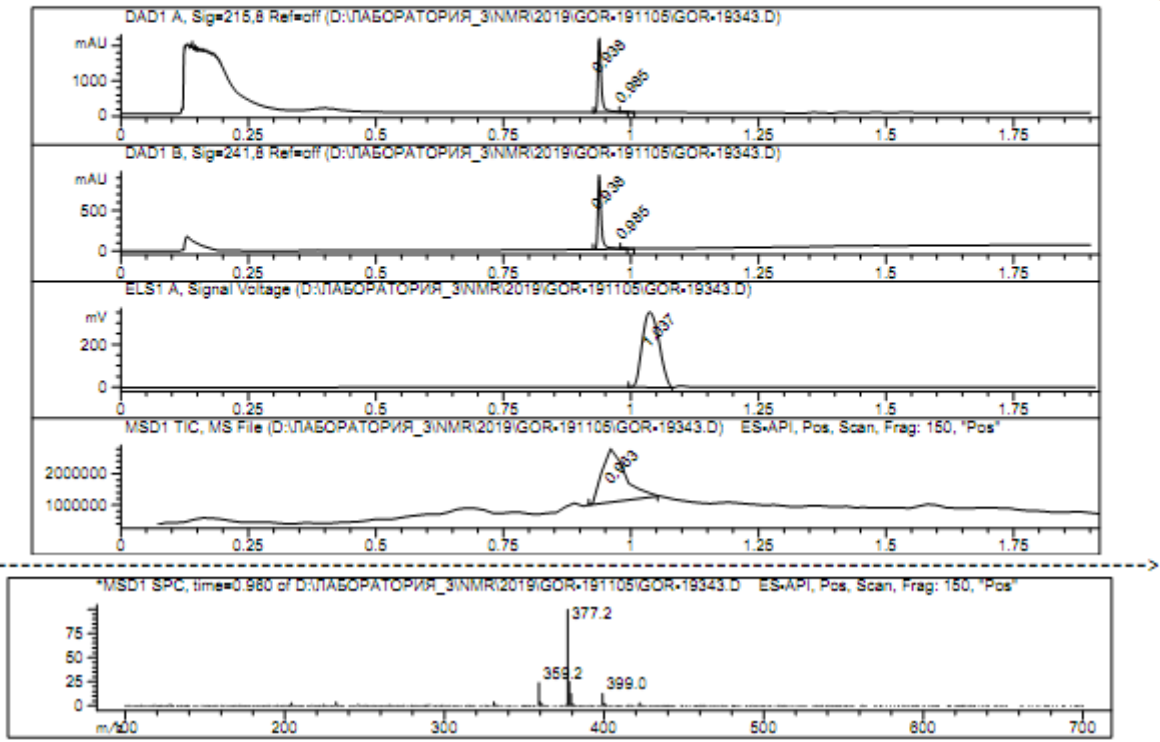

| #     | Signal                    | R.Time | Area %  |
|-------|---------------------------|--------|---------|
| 1     | DAD1 A, Sig=215,8 Ref=off | 0.938  | 99.403  |
| 2     |                           | 0.985  | 0.597   |
| ----- |                           |        |         |
| #     | Signal                    | R.Time | Area %  |
| 1     | DAD1 B, Sig=241,8 Ref=off | 0.938  | 99.433  |
| 2     |                           | 0.985  | 0.567   |
| ----- |                           |        |         |
| #     | Signal                    | R.Time | Area %  |
| 1     | ELS1 A, Signal Voltage    | 1.037  | 100.000 |
| ----- |                           |        |         |
| #     | Signal                    | R.Time | Area %  |
| 1     | MSD1 TIC, MS File         | 0.963  | 100.000 |

Figure S35. MS (ESI) spectrum of compound 4h.

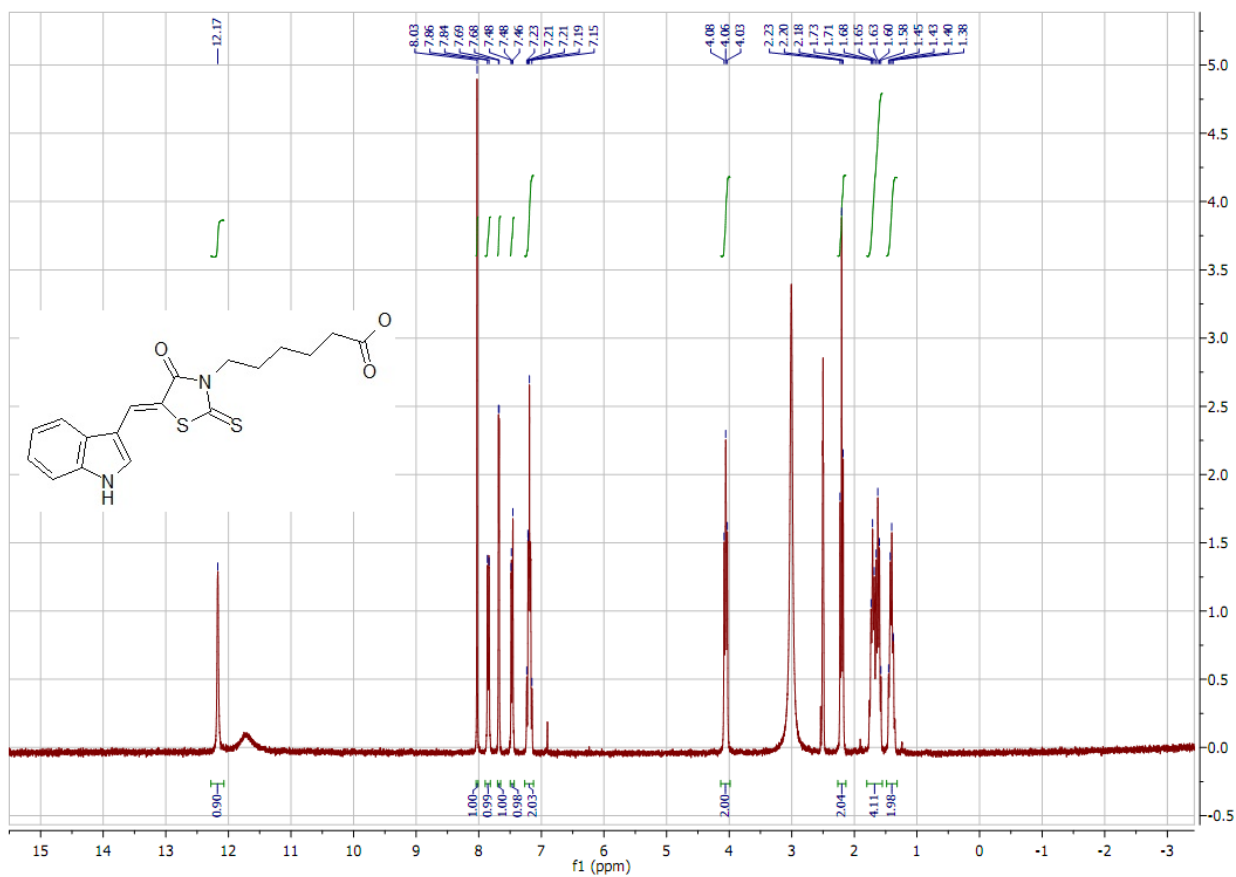

**Figure S36.**  $^1\text{H NMR}$  spectrum (300 MHz,  $\text{DMSO-d}_6$ ) of compound **4i**.

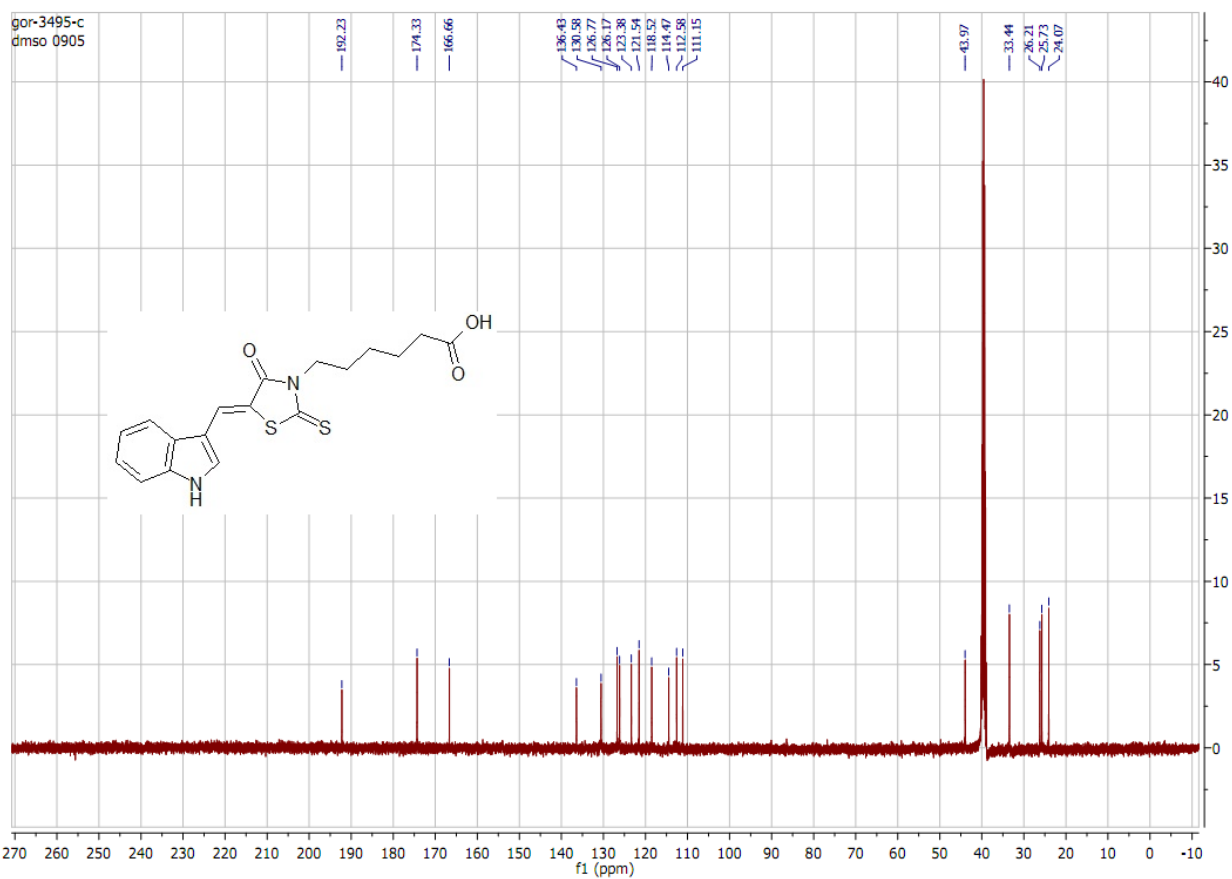

**Figure S37.**  $^{13}\text{C NMR}$  spectrum (101 MHz,  $\text{DMSO-d}_6$ ) of compound **4i**.



-o.-Syntez Purity Report -o.-

System: Agilent 1200 LC/MSD SL  
 Separation column: Rapid Resolution HT Cartige 4.6x30mm, 1.8-Micron, Zorbx SB-C18

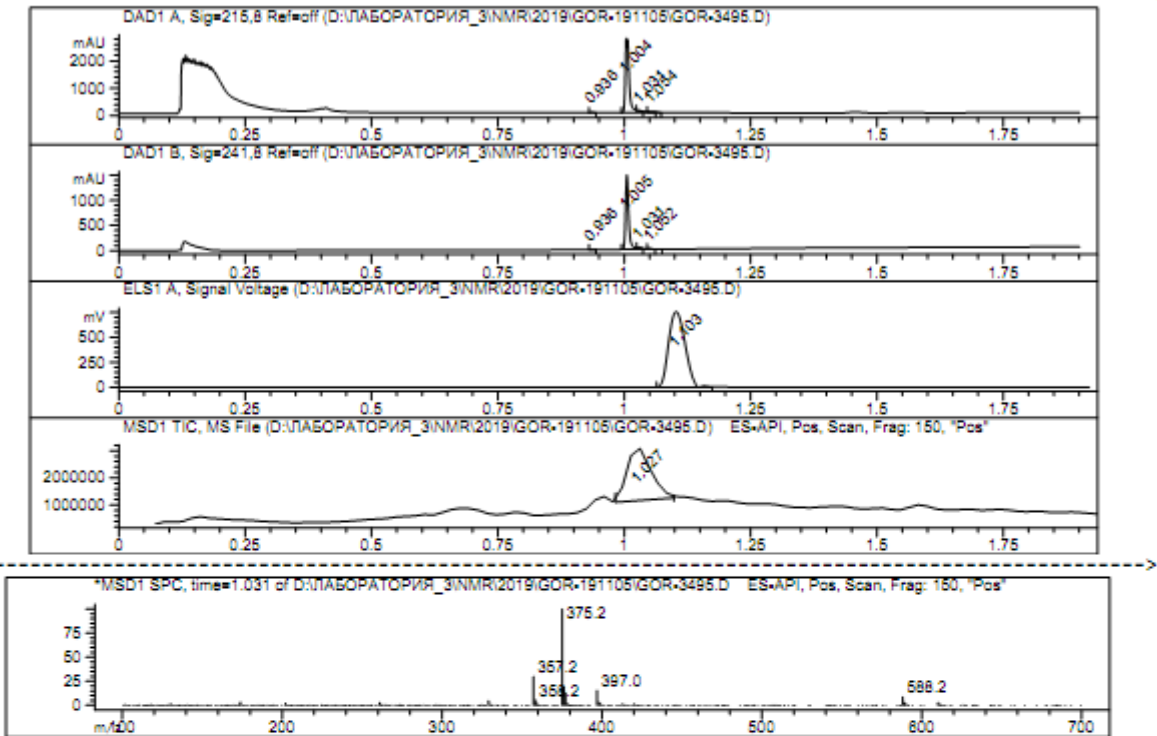

| # | Signal                    | R.Time | Area % |
|---|---------------------------|--------|--------|
| 1 | DAD1 A, Sig=215,8 Ref=off | 0.936  | 0.521  |
| 2 |                           | 1.004  | 98.688 |
| 3 |                           | 1.031  | 0.464  |
| 4 |                           | 1.054  | 0.327  |

  

| # | Signal                    | R.Time | Area % |
|---|---------------------------|--------|--------|
| 1 | DAD1 B, Sig=241,8 Ref=off | 0.936  | 0.314  |
| 2 |                           | 1.005  | 98.767 |
| 3 |                           | 1.031  | 0.621  |
| 4 |                           | 1.052  | 0.299  |

  

| # | Signal                 | R.Time | Area %  |
|---|------------------------|--------|---------|
| 1 | ELS1 A, Signal Voltage | 1.103  | 100.000 |

  

| # | Signal            | R.Time | Area %  |
|---|-------------------|--------|---------|
| 1 | MSD1 TIC, MS File | 1.027  | 100.000 |

Inj. Data 06.11.2019

Figure S38. MS (ESI) spectrum of compound 4i.

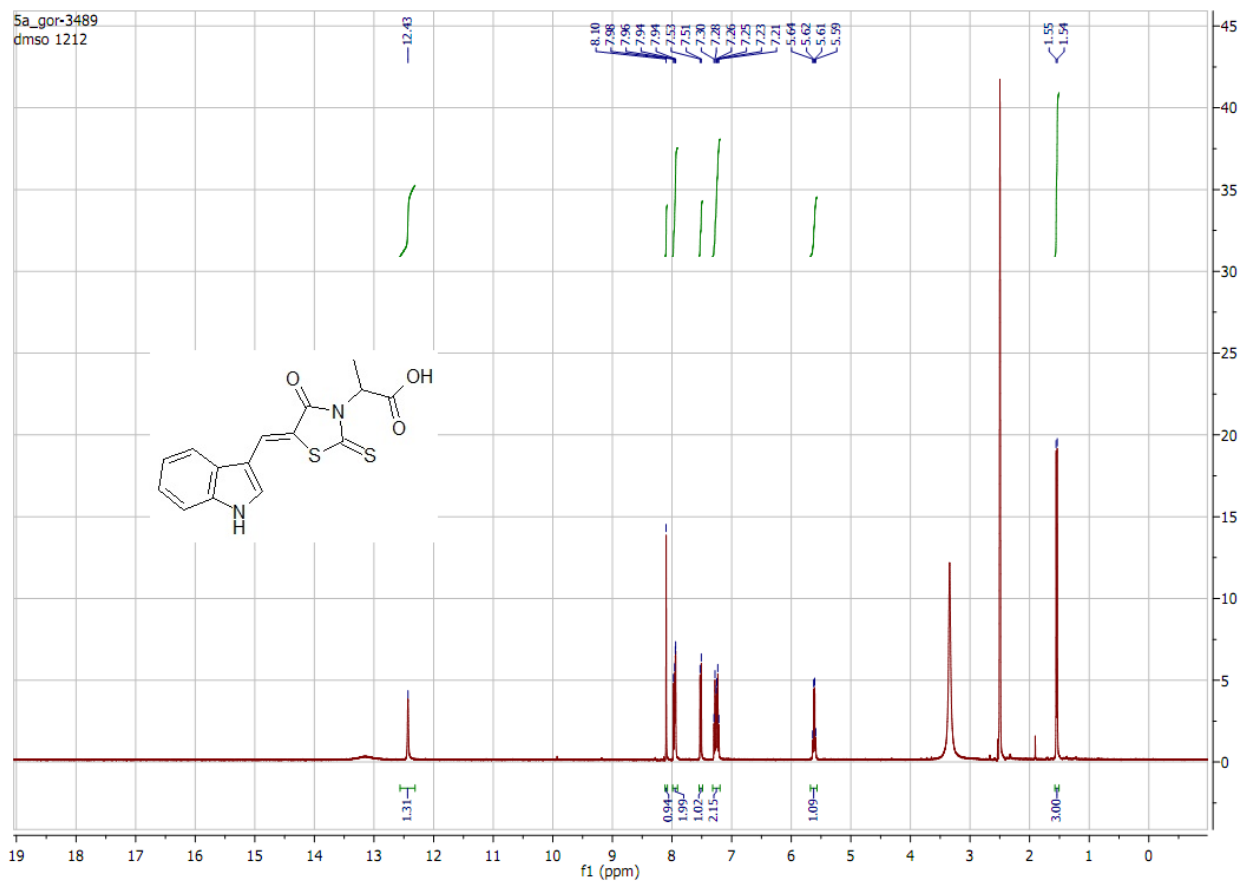

**Figure S39.**  $^1\text{H}$ NMR spectrum (400 MHz, DMSO- $d_6$ ) of compound **5a**.

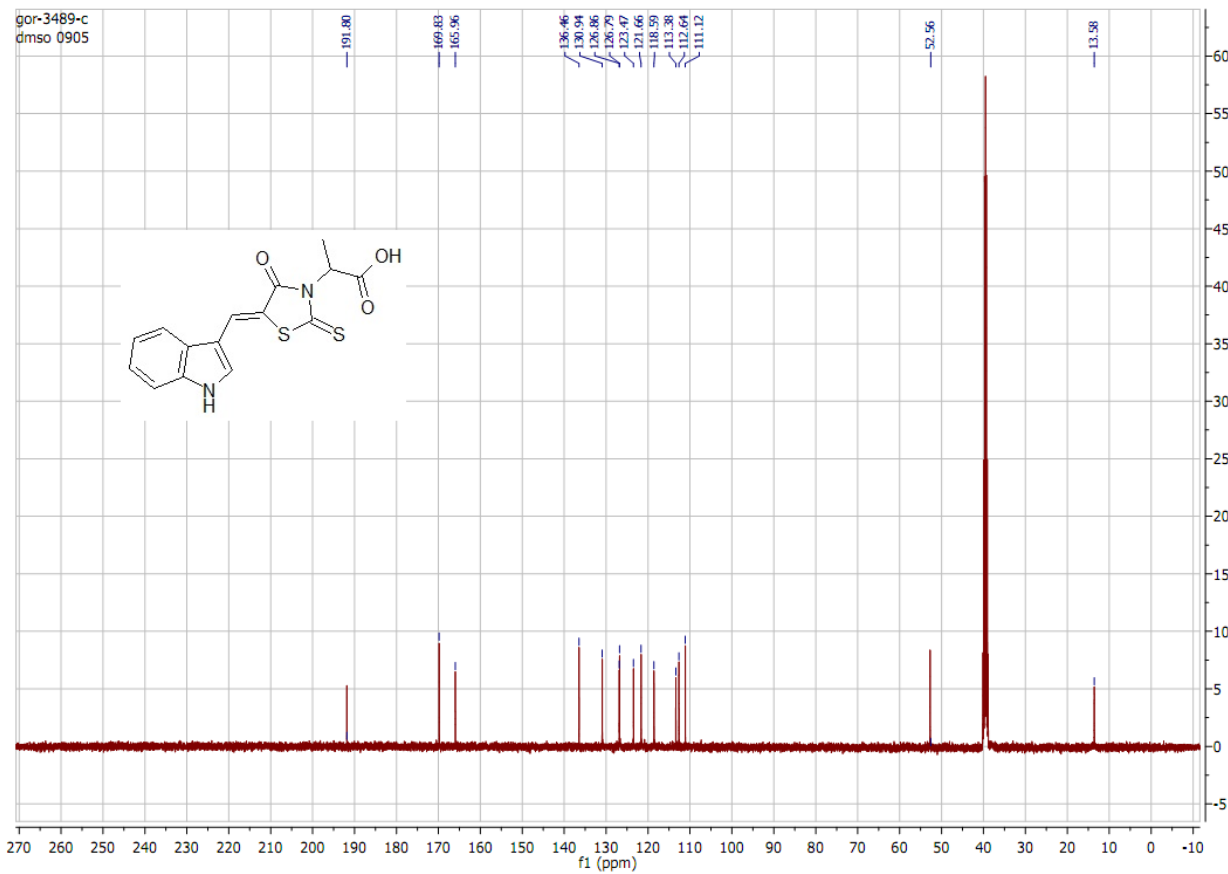

**Figure S40.**  $^{13}\text{C}$  NMR spectrum (101 MHz, DMSO- $d_6$ ) of compound **5a**.

-o.-Syntex Purity Report -o.-

System: Agilent 1200 LC/MSD SL  
 Separation column: Rapid Resolution HT Cartidge 4.6x30mm, 1.8-Micron, Zorbax SB-C18

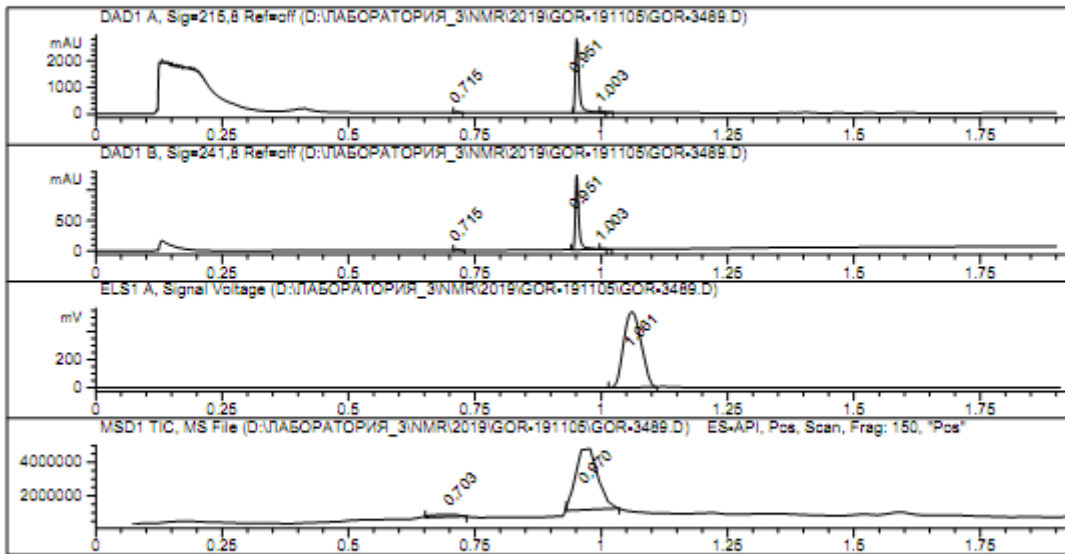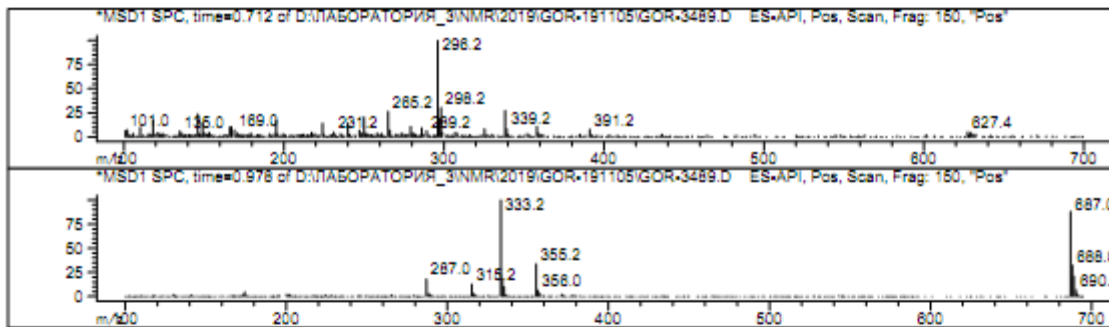

| #     | Signal                    | R.Time | Area %  |
|-------|---------------------------|--------|---------|
| 1     | DAD1 A, Sig=215,8 Ref=off | 0.715  | 1.110   |
| 2     |                           | 0.951  | 98.711  |
| 3     |                           | 1.003  | 0.179   |
| ----- |                           |        |         |
| #     | Signal                    | R.Time | Area %  |
| 1     | DAD1 B, Sig=241,8 Ref=off | 0.715  | 1.847   |
| 2     |                           | 0.951  | 97.819  |
| 3     |                           | 1.003  | 0.334   |
| ----- |                           |        |         |
| #     | Signal                    | R.Time | Area %  |
| 1     | ELSI A, Signal Voltage    | 1.061  | 100.000 |
| ----- |                           |        |         |
| #     | Signal                    | R.Time | Area %  |
| 1     | MSD1 TIC, MS File         | 0.703  | 4.220   |
| 2     |                           | 0.970  | 95.780  |

Inj. Data 06.11.2019

Figure S41. MS (ESI) spectrum of compound 5a.

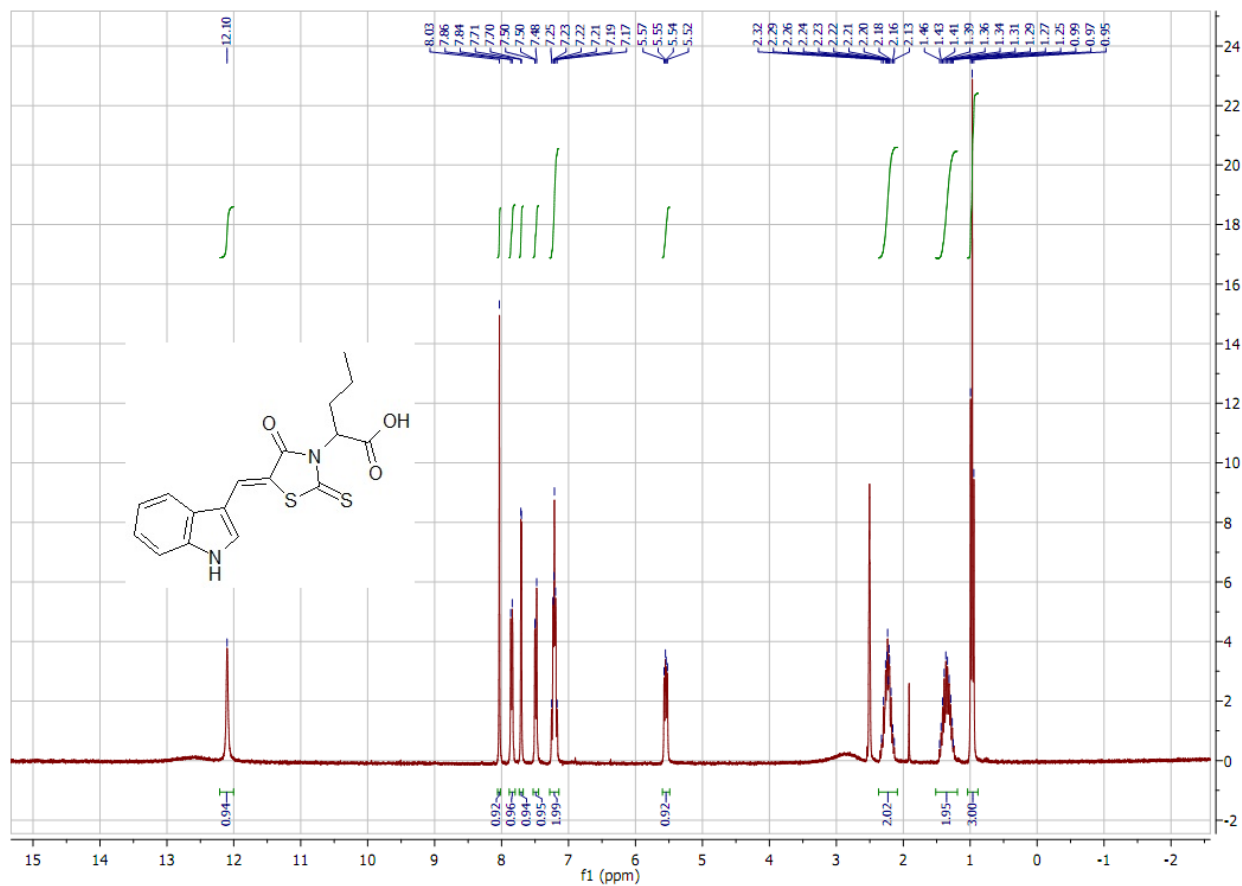

**Figure S42.**  $^1\text{H}$ NMR spectrum (300 MHz,  $\text{DMSO-d}_6$ ) of compound **5b**.

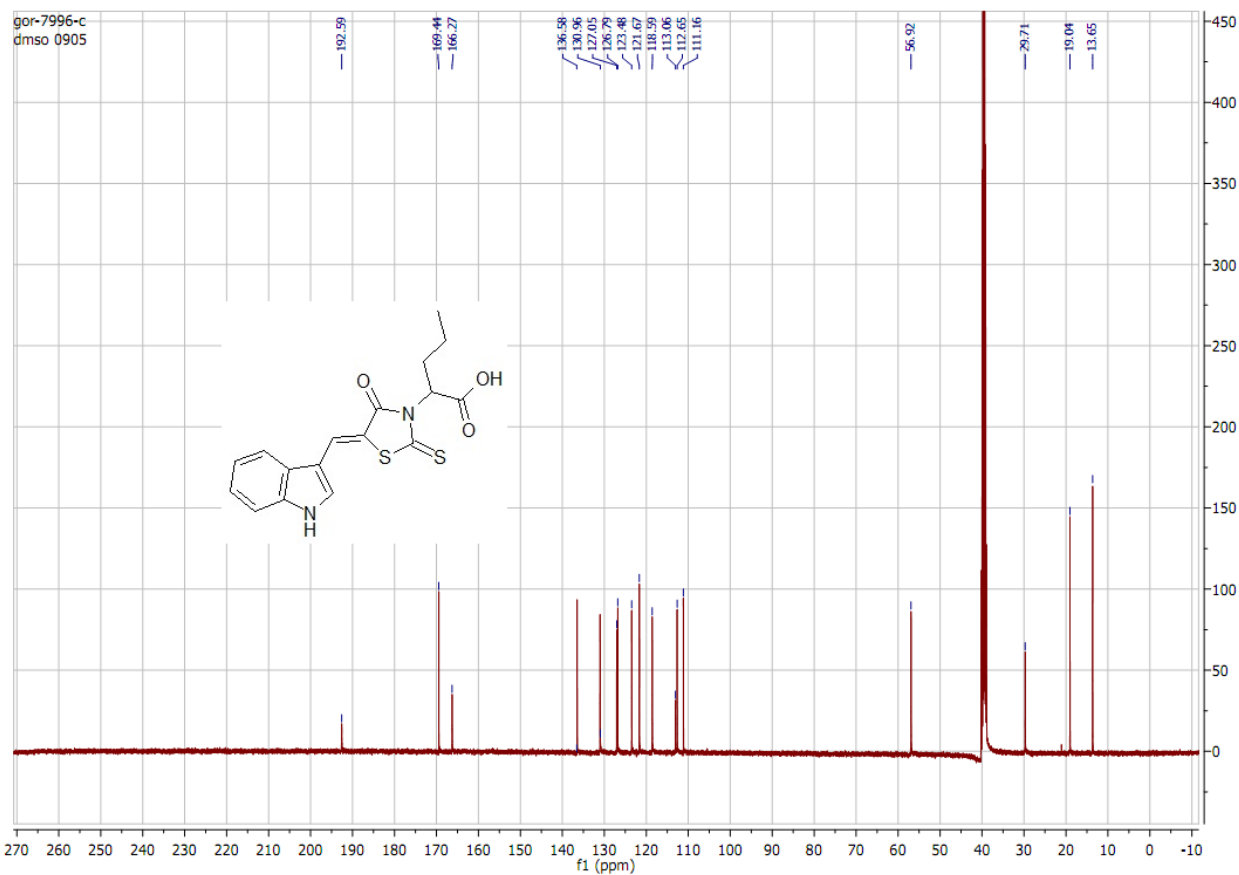

**Figure S43.**  $^{13}\text{C}$  NMR spectrum (101 MHz,  $\text{DMSO-d}_6$ ) of compound **5b**.

-o.-Syntez Purity Report -o.-

System: Agilent 1200 LC/MSD SL  
 Separation column: Rapid Resolution HT Cartige 4.6x30mm, 1.8-Micron, Zorbx SB-C18

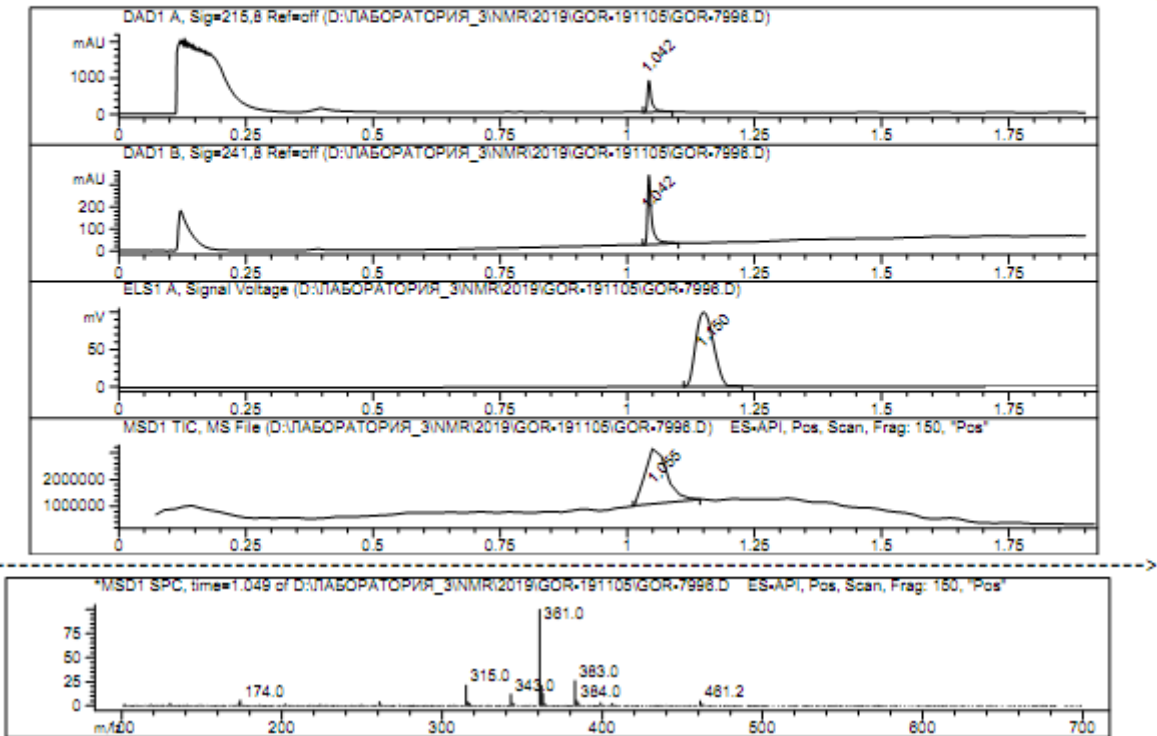

| # | Signal                    | R.Time | Area %  |
|---|---------------------------|--------|---------|
| 1 | DAD1 A, Sig=215,8 Ref=off | 1.042  | 100.000 |
| 1 | DAD1 B, Sig=241,8 Ref=off | 1.042  | 100.000 |
| 1 | ELS1 A, Signal Voltage    | 1.150  | 100.000 |
| 1 | MSD1 TIC, MS File         | 1.055  | 100.000 |

Figure S44. MS (ESI) spectrum of compound 5b.

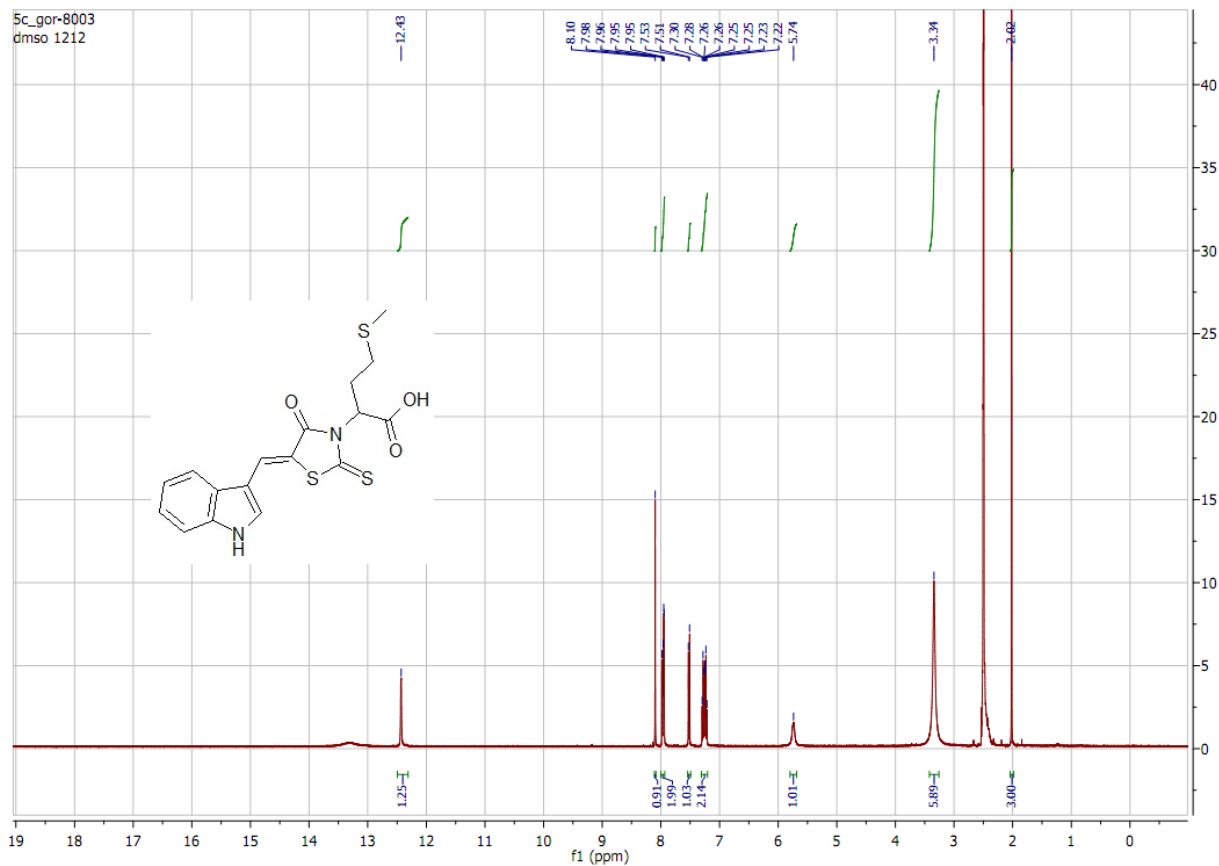

**Figure S45.**  $^1\text{H}$ NMR spectrum (400 MHz, DMSO- $d_6$ ) of compound **5c**.

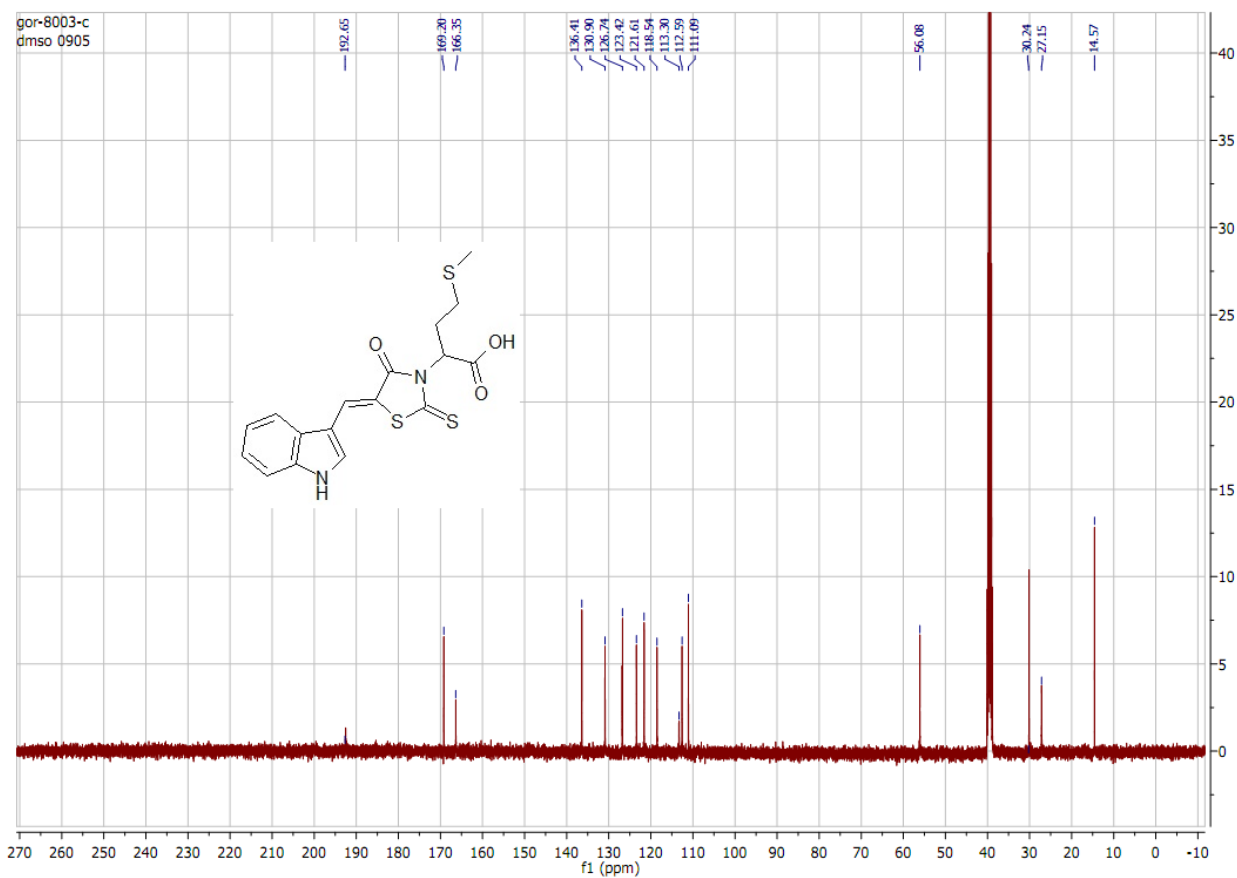

**Figure S46.**  $^{13}\text{C}$  NMR spectrum (101 MHz, DMSO- $d_6$ ) of compound **5c**.

sample name: GOR-8003

-o.-Syntex Purity Report -o.-

System: Agilent 1200 LC/MSD SL  
Separation column: Rapid Resolution HT Cartridge 4.6x30mm, 1.8-Micron, Zorbx SB-C18

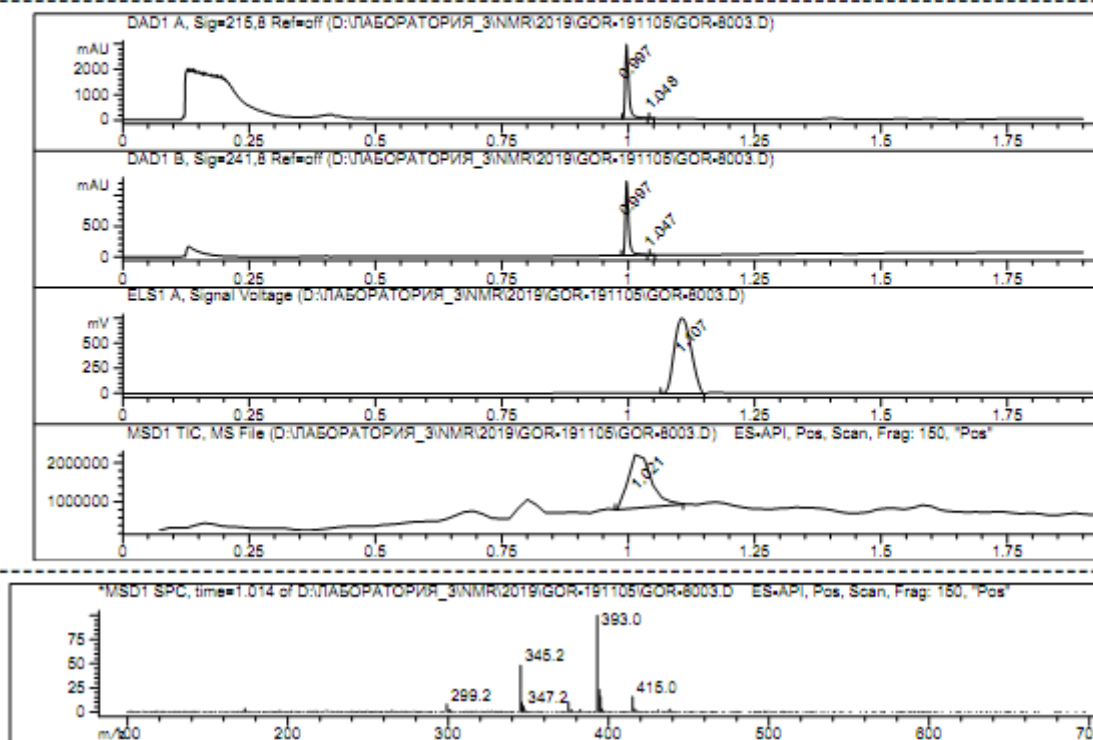

| # | Signal                    | R.Time | Area %  |
|---|---------------------------|--------|---------|
| 1 | DAD1 A, Sig=215,8 Ref=off | 0.997  | 99.691  |
| 2 |                           | 1.048  | 0.309   |
| # | Signal                    | R.Time | Area %  |
| 1 | DAD1 B, Sig=241,8 Ref=off | 0.997  | 99.552  |
| 2 |                           | 1.047  | 0.448   |
| # | Signal                    | R.Time | Area %  |
| 1 | ELSI A, Signal Voltage    | 1.107  | 100.000 |
| # | Signal                    | R.Time | Area %  |
| 1 | MSD1 TIC, MS File         | 1.021  | 100.000 |

Inj. Data 06.11.2019

Figure S47. MS (ESI) spectrum of compound 5c.

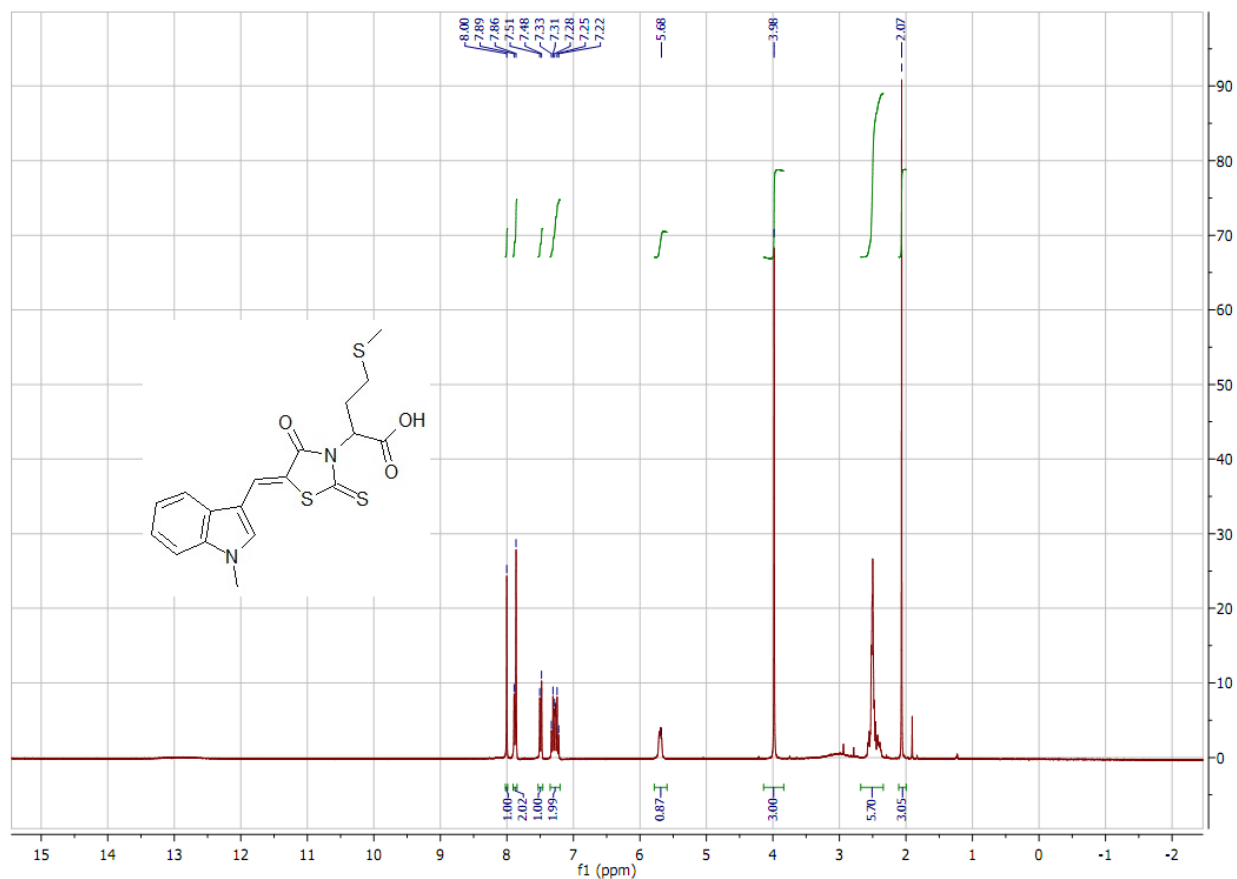

**Figure S48.** <sup>1</sup>H NMR spectrum (300 MHz, DMSO-d<sub>6</sub>) of compound **5d**.

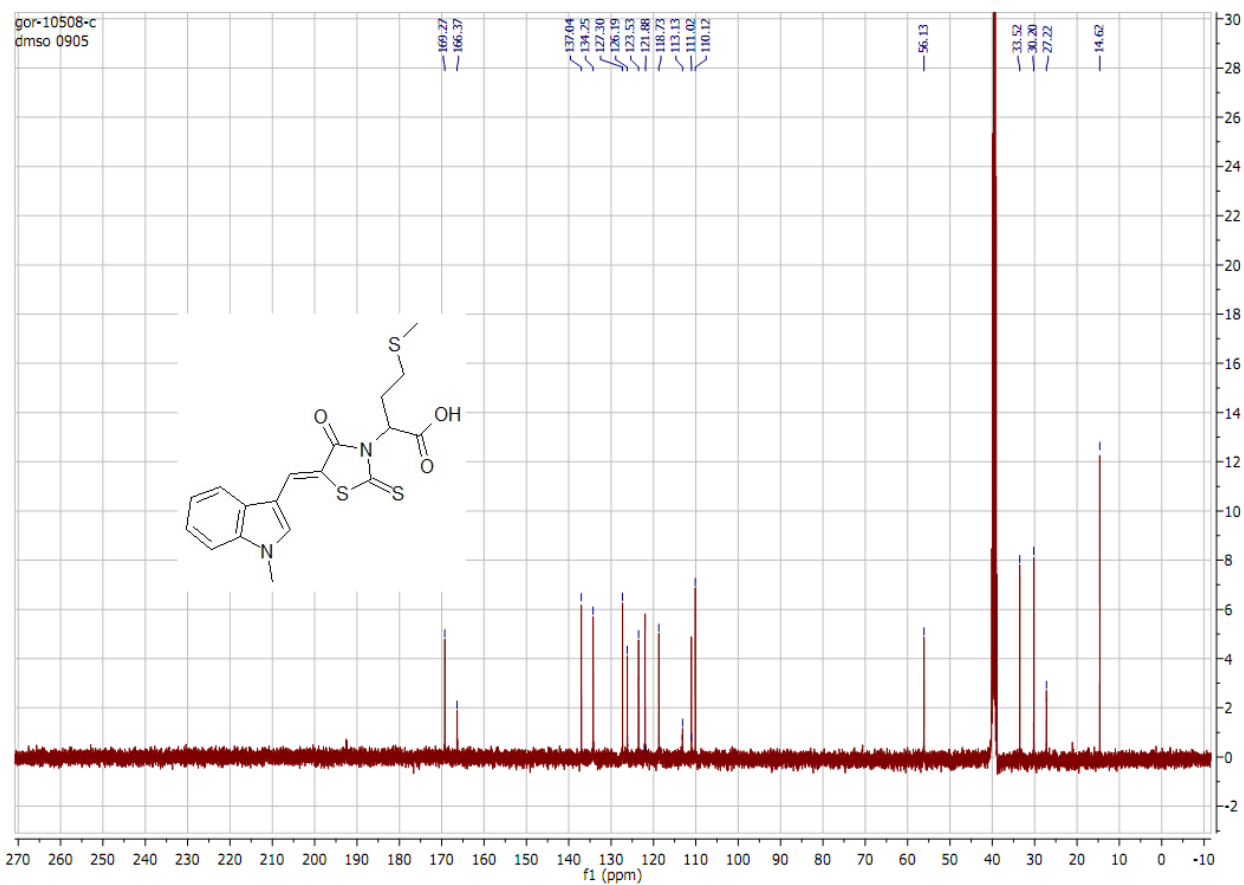

**Figure S49.** <sup>13</sup>C NMR spectrum (101 MHz, DMSO-d<sub>6</sub>) of compound **5d**.



-o.-Syntex Purity Report -o.-

System: Agilent 1200 LC/MSD SL

Separation column: Rapid Resolution HT Cartridge 4.6x30mm, 1.8-Micron, Zorbax SB-C18

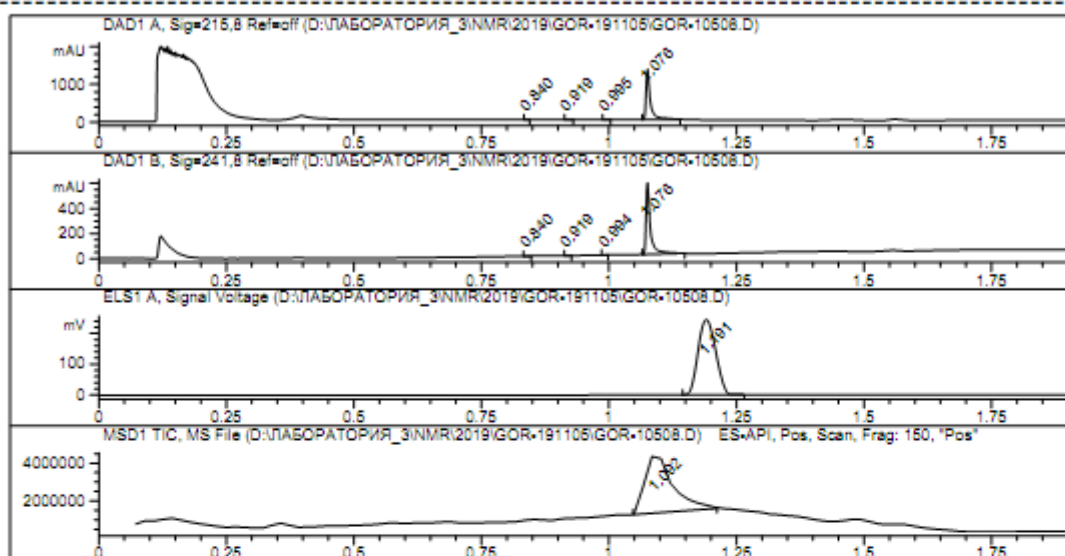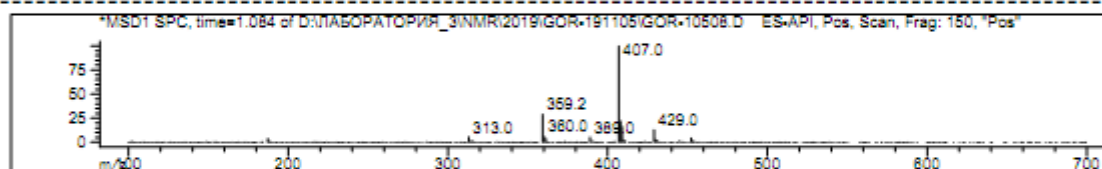

| # | Signal                    | R.Time | Area %  |
|---|---------------------------|--------|---------|
| 1 | DAD1 A, Sig=215,8 Ref=off | 0.840  | 0.092   |
| 2 |                           | 0.919  | 0.281   |
| 3 |                           | 0.995  | 0.246   |
| 4 |                           | 1.076  | 99.381  |
| # | Signal                    | R.Time | Area %  |
| 1 | DAD1 B, Sig=241,8 Ref=off | 0.840  | 0.088   |
| 2 |                           | 0.919  | 0.309   |
| 3 |                           | 0.994  | 0.220   |
| 4 |                           | 1.076  | 99.383  |
| # | Signal                    | R.Time | Area %  |
| 1 | ELS1 A, Signal Voltage    | 1.191  | 100.000 |
| # | Signal                    | R.Time | Area %  |
| 1 | MSD1 TIC, MS File         | 1.092  | 100.000 |

Inj. Data 05.11.2019

Figure S50. MS (ESI) spectrum of compound 5d.

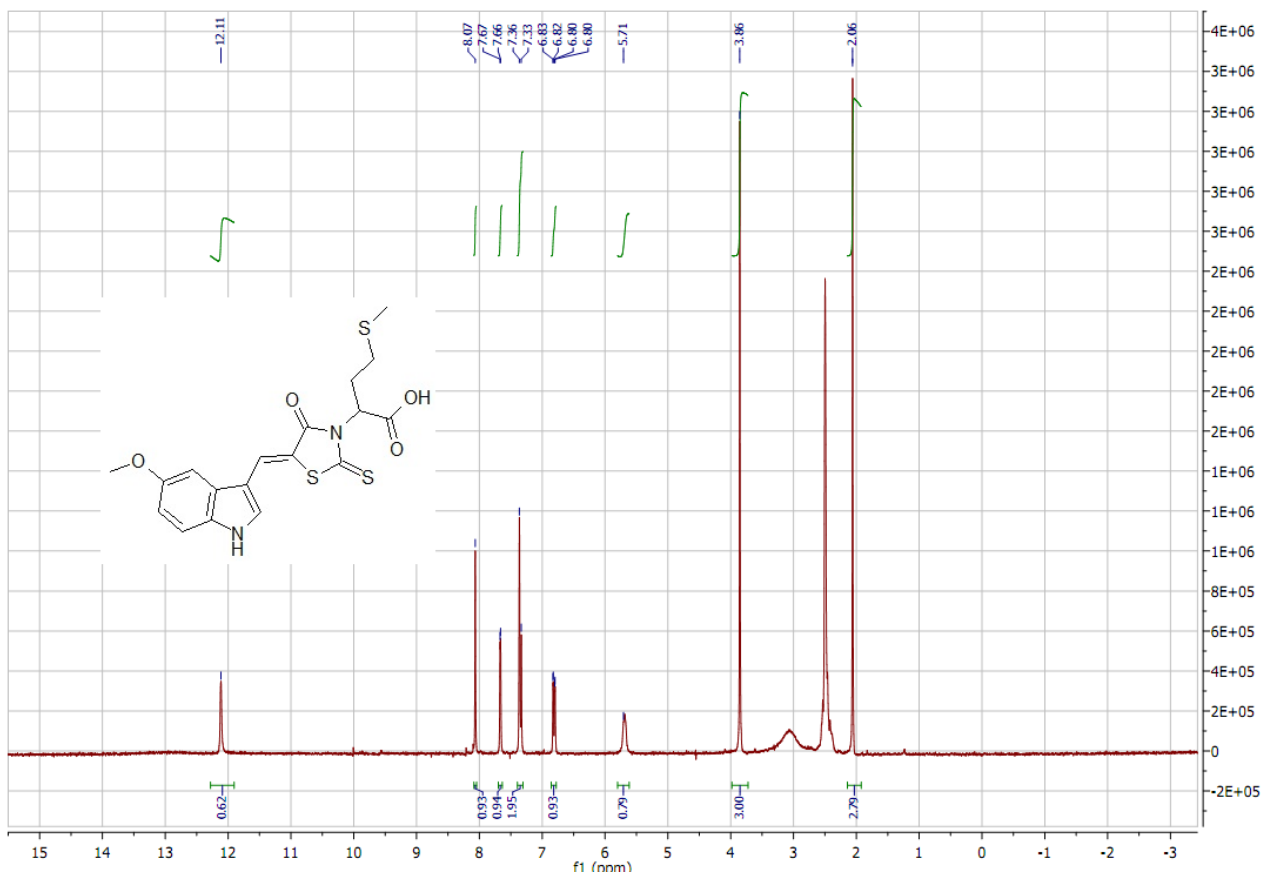

**Figure S51.**  $^1\text{H}$ NMR spectrum (300 MHz, DMSO- $d_6$ ) of compound 5e.

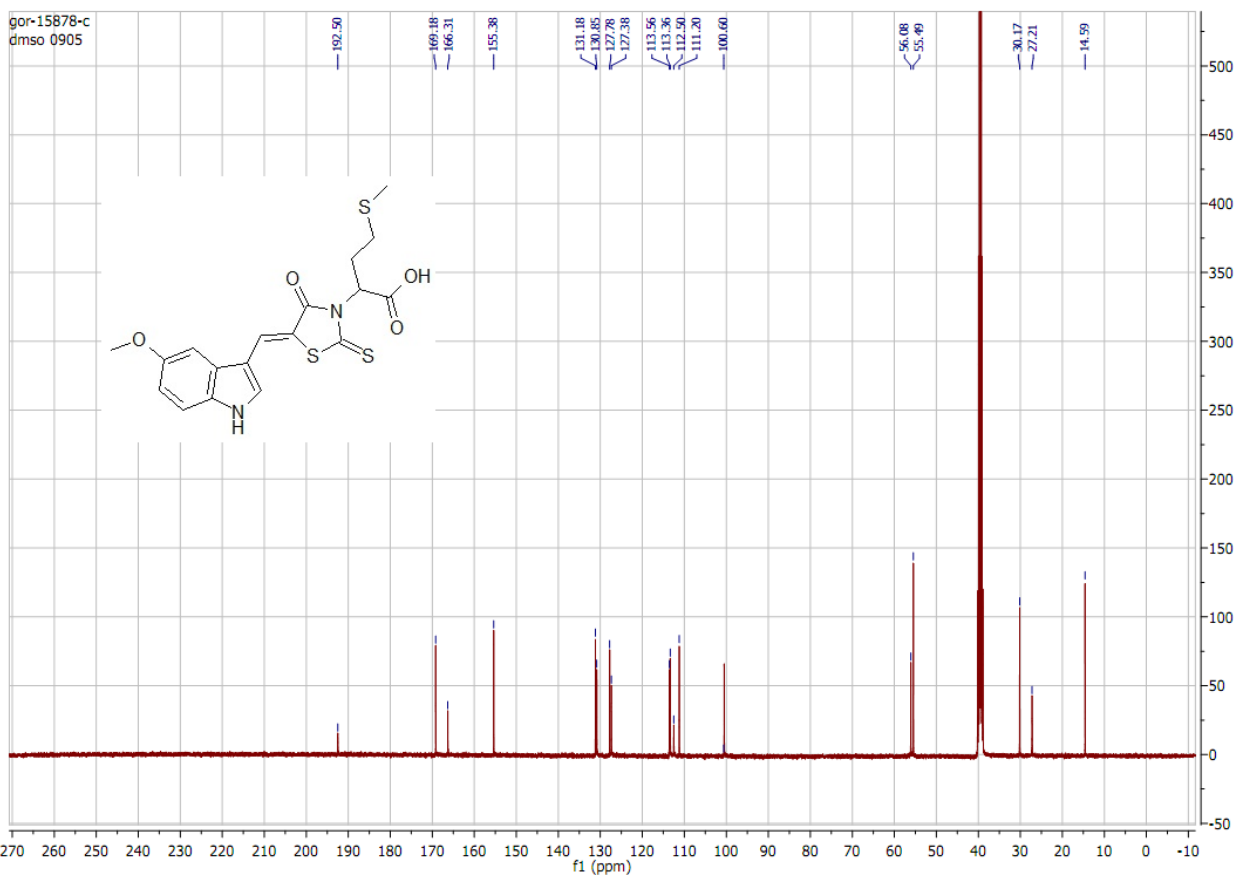

**Figure S52.**  $^{13}\text{C}$  NMR spectrum (101 MHz, DMSO- $d_6$ ) of compound 5e.

-.o.-Syntex Purity Report -.o.-

System: Agilent 1200 LC/MSD SL

Separation column: Rapid Resolution HT Cartige 4.6x30mm, 1.8-Micron, Zorbx SB-C18

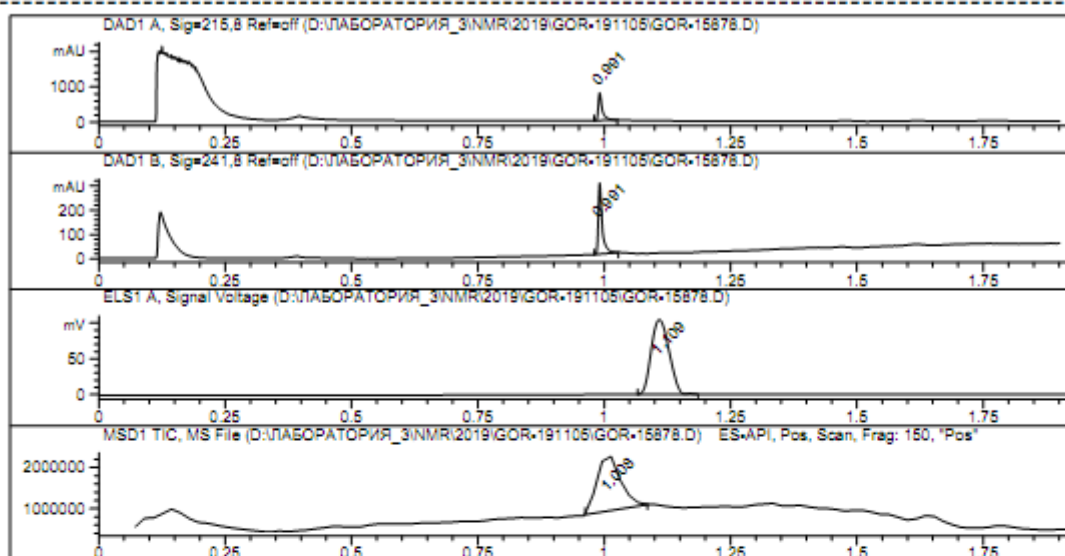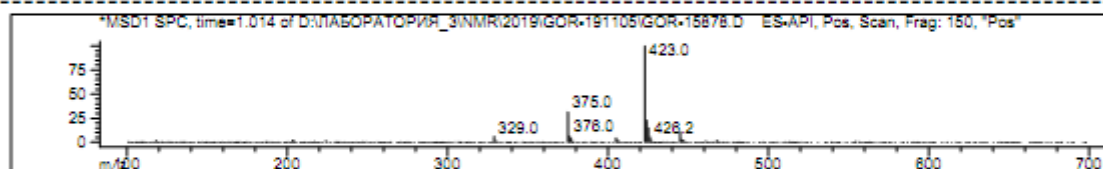

| # | Signal                    | R.Time | Area %  |
|---|---------------------------|--------|---------|
| 1 | DAD1 A, Sig=215,8 Ref=off | 0.991  | 100.000 |
| # | Signal                    | R.Time | Area %  |
| 1 | DAD1 B, Sig=241,8 Ref=off | 0.991  | 100.000 |
| # | Signal                    | R.Time | Area %  |
| 1 | ELS1 A, Signal Voltage    | 1.109  | 100.000 |
| # | Signal                    | R.Time | Area %  |
| 1 | MSD1 TIC, MS File         | 1.008  | 100.000 |

Inj. Date 05.11.2019

Figure S53. MS (ESI) spectrum of compound 5e.

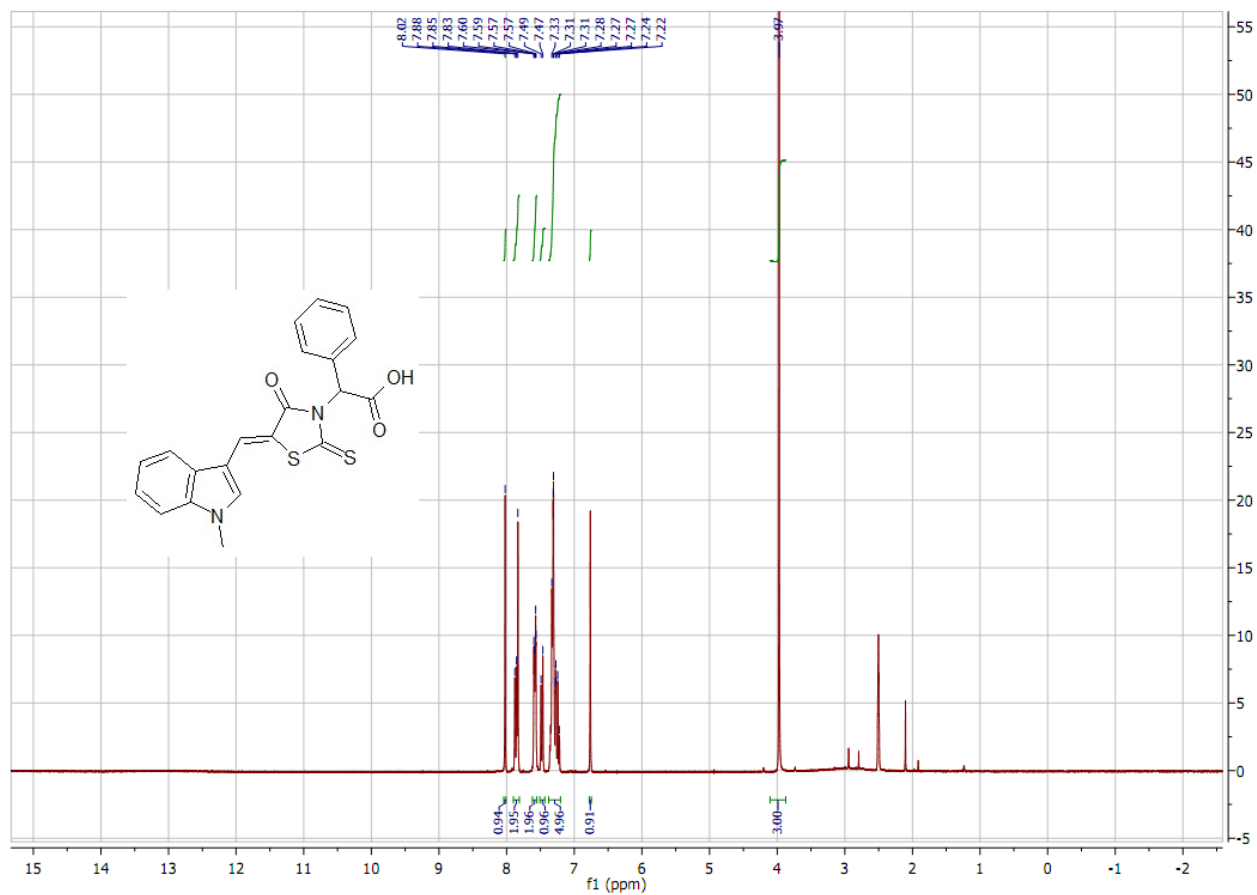

**Figure S54.** <sup>1</sup>H NMR spectrum (300 MHz, DMSO-d<sub>6</sub>) of compound **5f**.

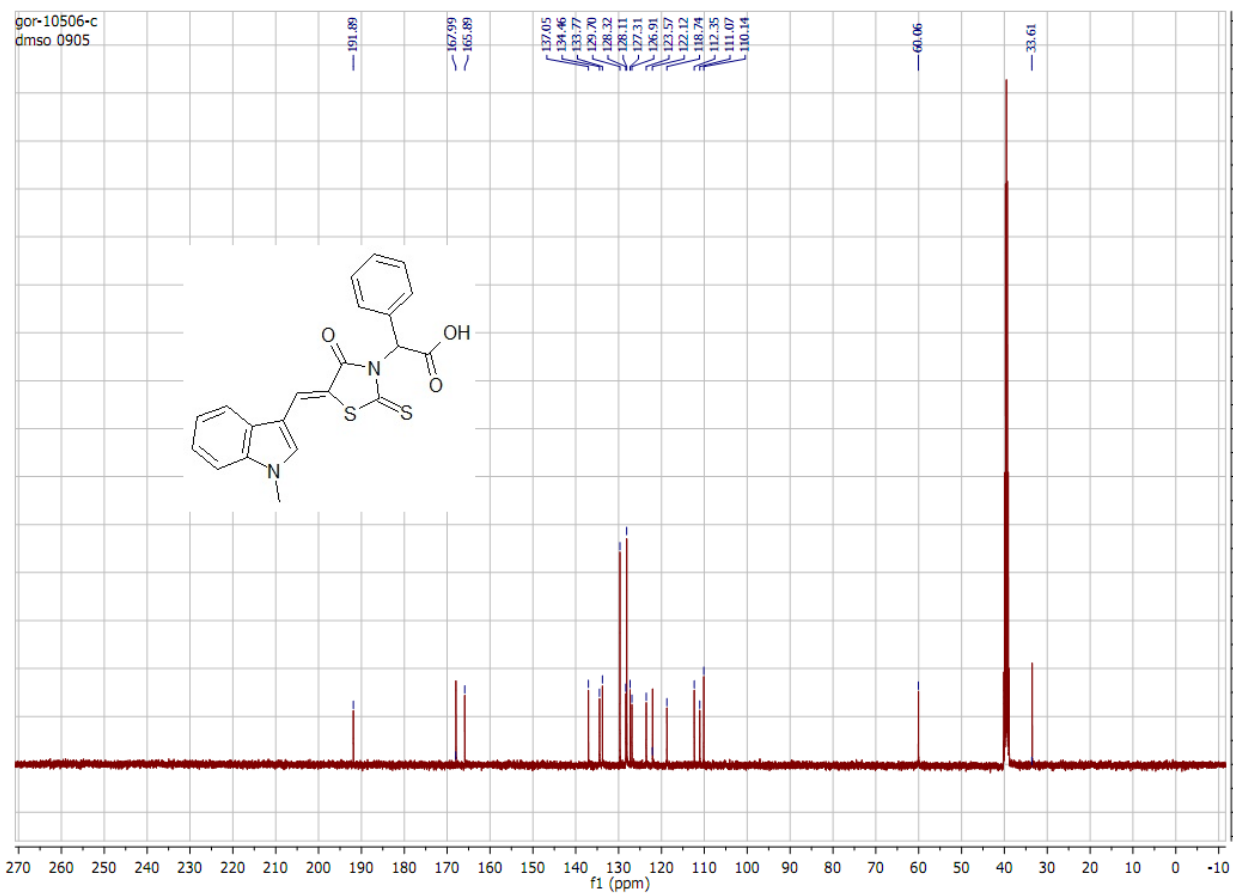

**Figure S55.** <sup>13</sup>C NMR spectrum (101 MHz, DMSO-d<sub>6</sub>) of compound **5f**.

-o.-Syntez Purity Report -o.-

System: Agilent 1200 LC/MSD SL  
 Separation column: Rapid Resolution HT Cartige 4.6x30mm, 1.8-Micron, Zorbx SB-C18

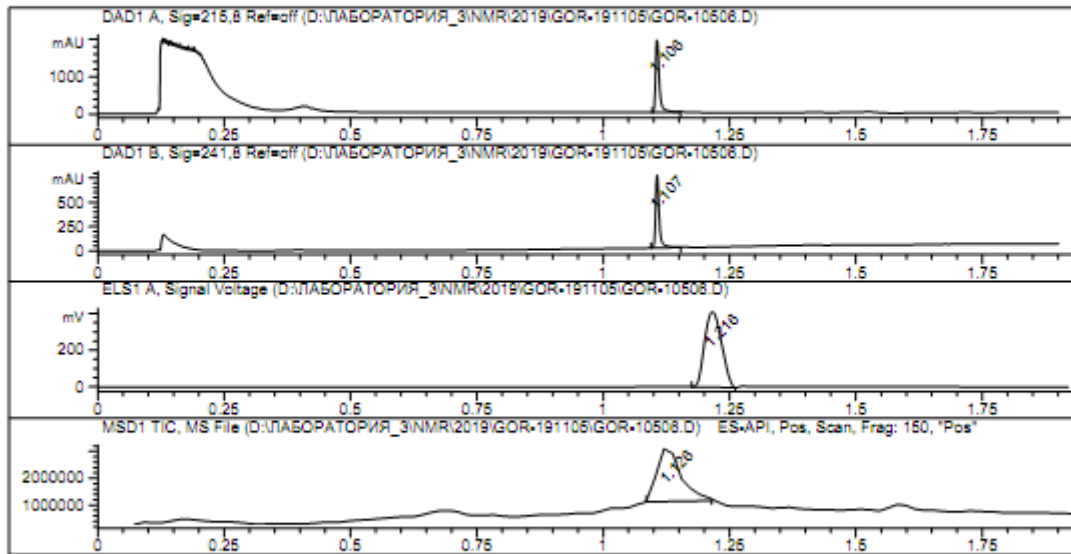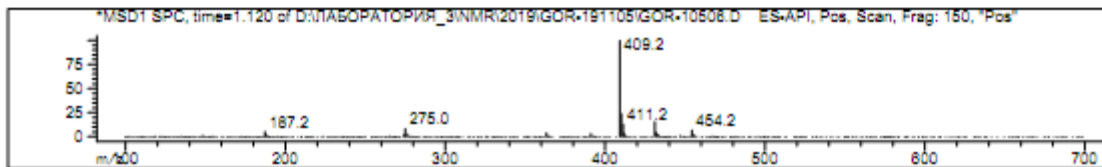

| # | Signal                    | R.Time | Area %  |
|---|---------------------------|--------|---------|
| 1 | DAD1 A, Sig=215,8 Ref=off | 1.106  | 100.000 |
| 1 | DAD1 B, Sig=241,8 Ref=off | 1.107  | 100.000 |
| 1 | ELS1 A, Signal Voltage    | 1.216  | 100.000 |
| 1 | MSD1 TIC, MS File         | 1.126  | 100.000 |

Inj. Data 06.11.2019

**Figure S56.** MS (ESI) spectrum of compound **5f**.

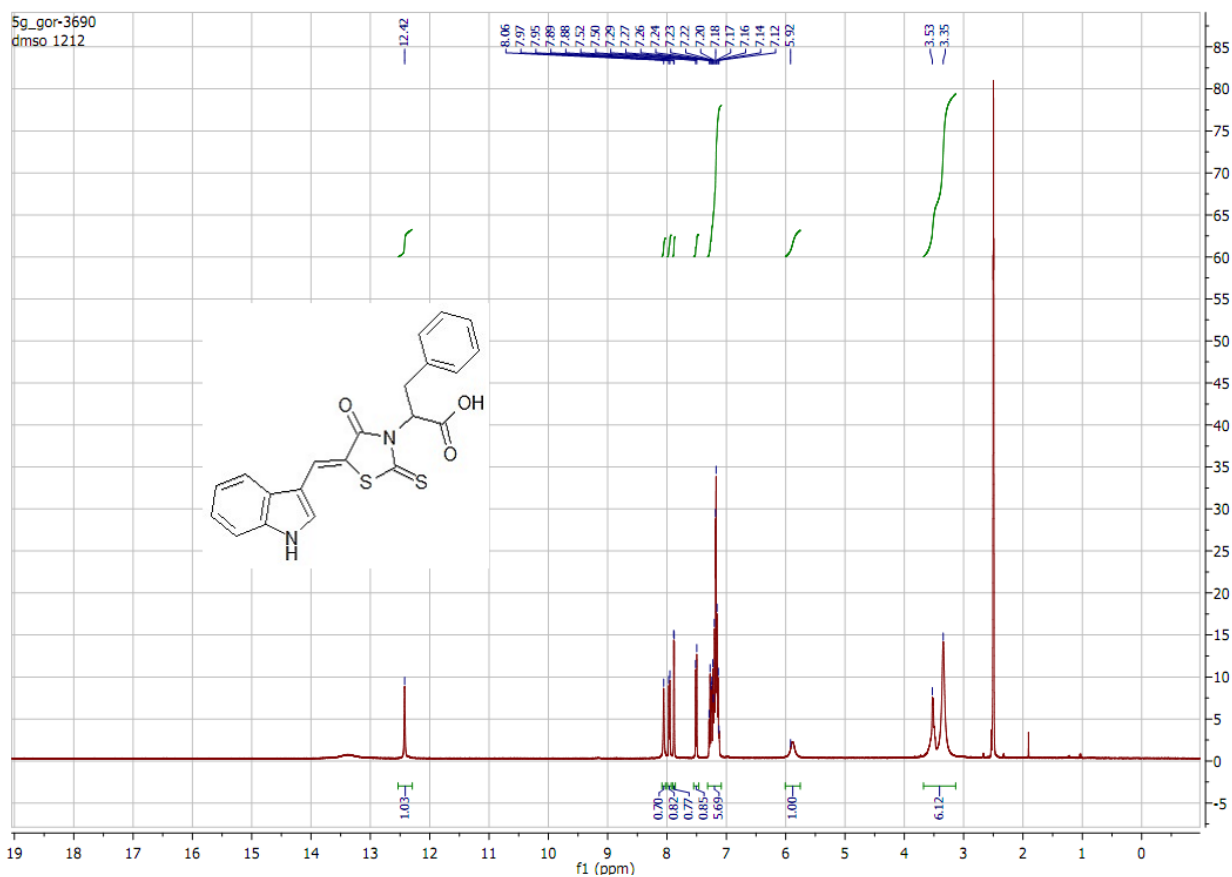

**Figure S57.**  $^1\text{H}$ NMR spectrum (400 MHz,  $\text{DMSO-d}_6$ ) of compound **5g**.

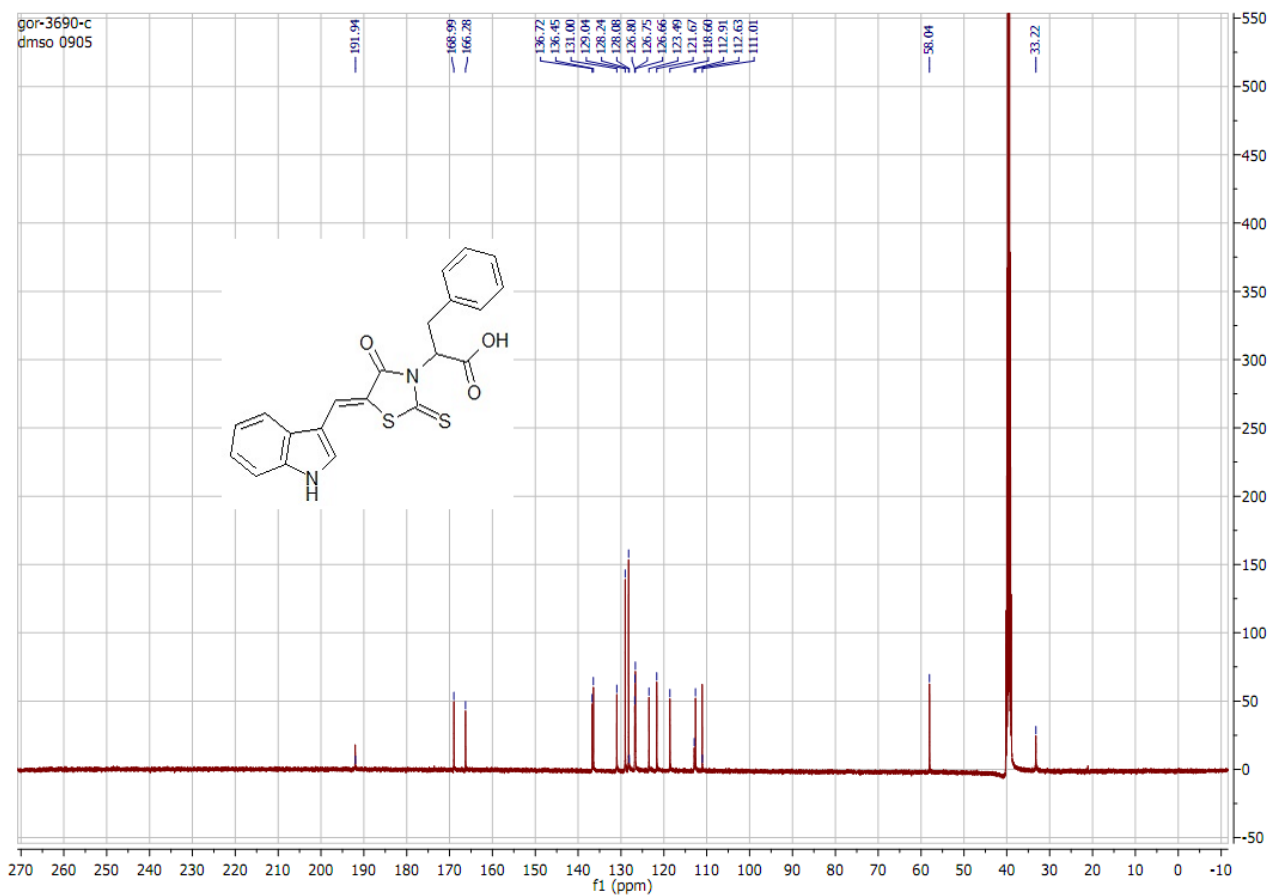

**Figure S58.**  $^{13}\text{C}$  NMR spectrum (101 MHz,  $\text{DMSO-d}_6$ ) of compound **5g**.

-o.-Syntez Purity Report -o.-

System: Agilent 1200 LC/MSD SL

Separation column: Rapid Resolutionn HT Cartige 4.6x30mm, 1.8-Micron, Zorbx SB-C18

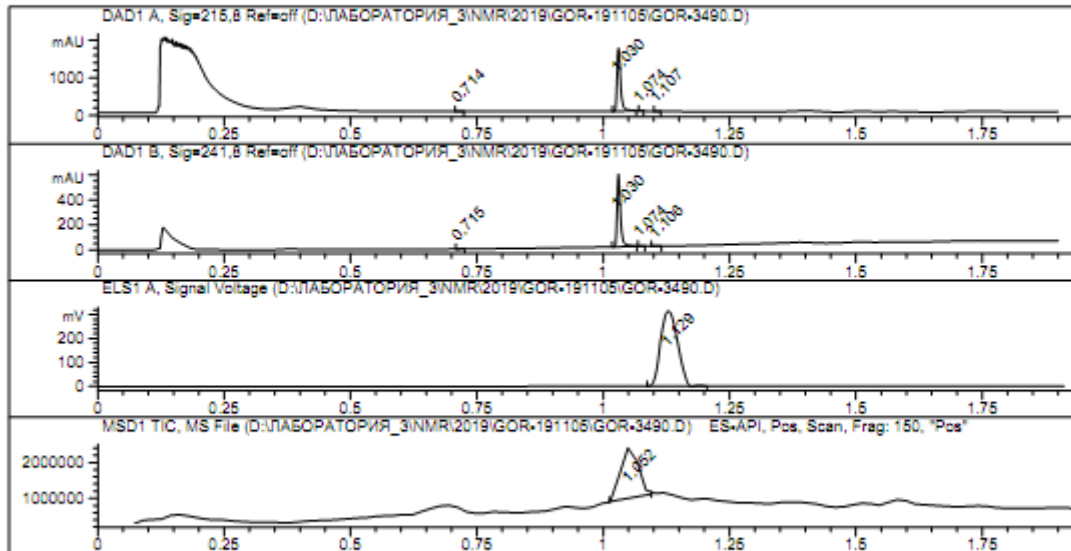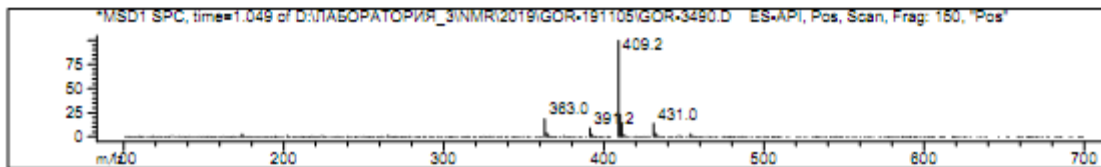

| #     | Signal                    | R.Time | Area %  |
|-------|---------------------------|--------|---------|
| 1     | DAD1 A, Sig=215,8 Ref=off | 0.714  | 0.604   |
| 2     |                           | 1.030  | 98.747  |
| 3     |                           | 1.074  | 0.358   |
| 4     |                           | 1.107  | 0.291   |
| ----- |                           |        |         |
| #     | Signal                    | R.Time | Area %  |
| 1     | DAD1 B, Sig=241,8 Ref=off | 0.715  | 0.925   |
| 2     |                           | 1.030  | 98.497  |
| 3     |                           | 1.074  | 0.230   |
| 4     |                           | 1.106  | 0.349   |
| ----- |                           |        |         |
| #     | Signal                    | R.Time | Area %  |
| 1     | ELS1 A, Signal Voltage    | 1.129  | 100.000 |
| ----- |                           |        |         |
| #     | Signal                    | R.Time | Area %  |
| 1     | MSD1 TIC, MS File         | 1.052  | 100.000 |

Inj. Date 06.11.2019

Figure S59. MS (ESI) spectrum of compound 5g.

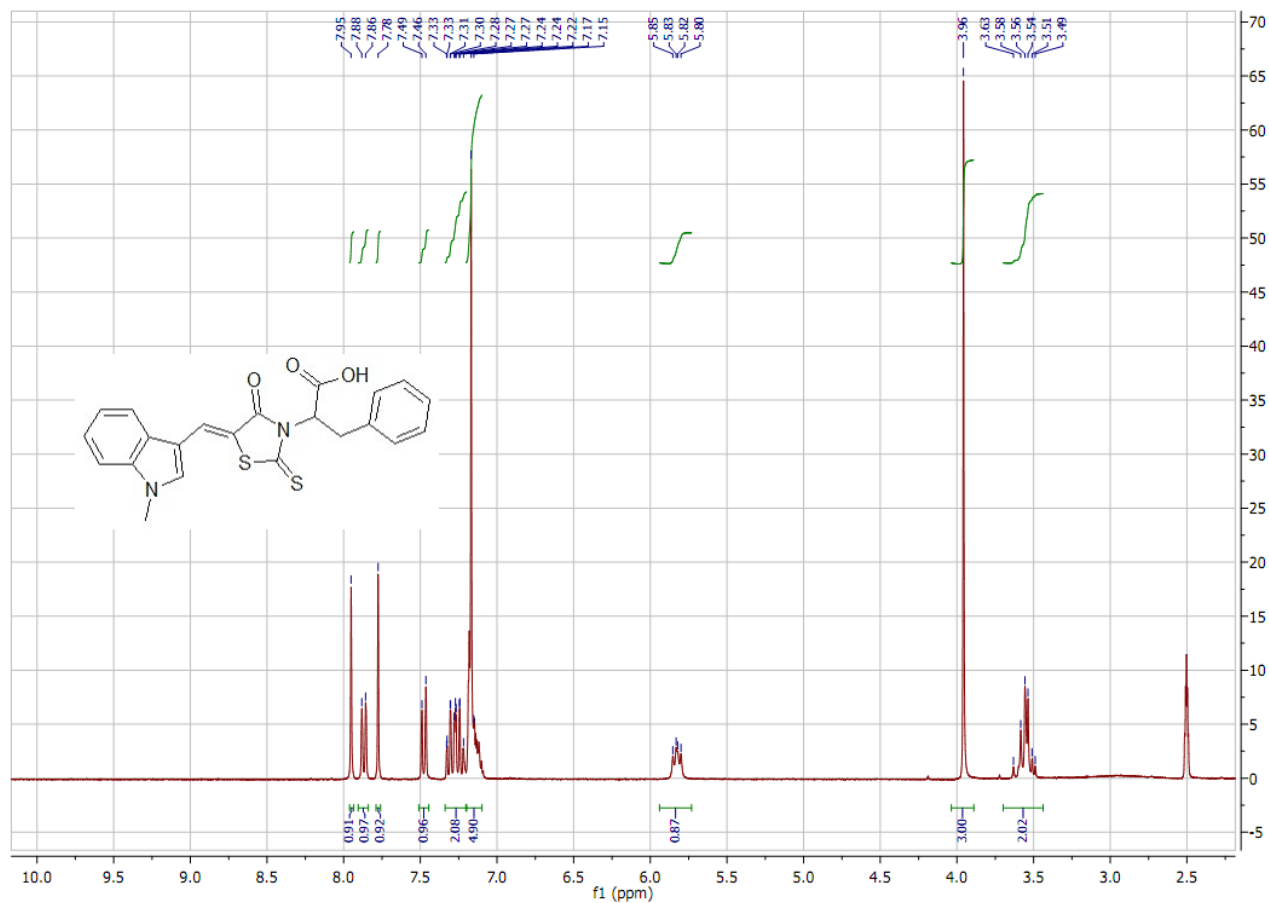

**Figure S60.** <sup>1</sup>H NMR spectrum (300 MHz, DMSO-d<sub>6</sub>) of compound **5h**.

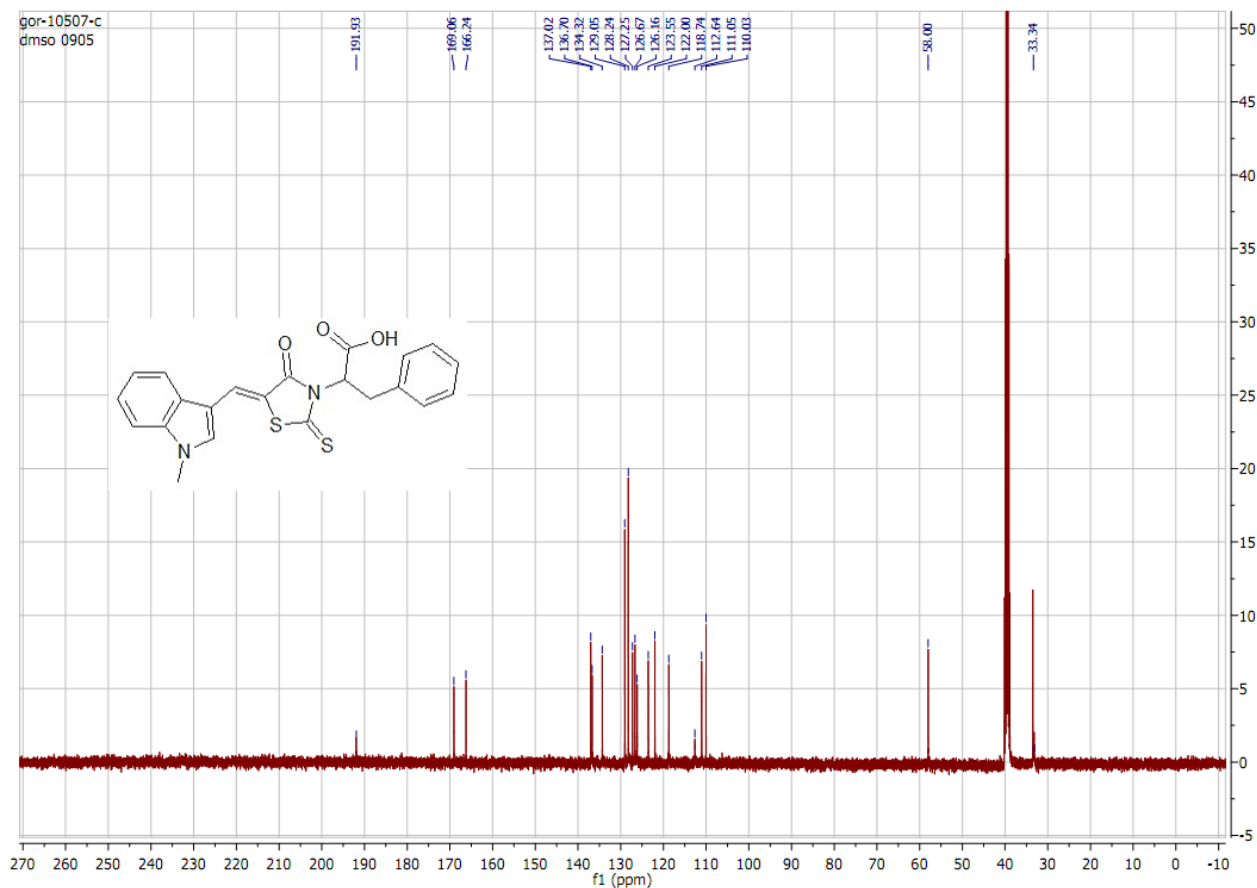

**Figure S61.** <sup>13</sup>C NMR spectrum (101 MHz, DMSO-d<sub>6</sub>) of compound **5h**.



-o.-Syntex Purity Report -o.-

System: Agilent 1200 LC/MSD SL  
 Separation column: Rapid Resolution HT Cartige 4.6x30mm, 1.8-Micron, Zorbx SB-C18

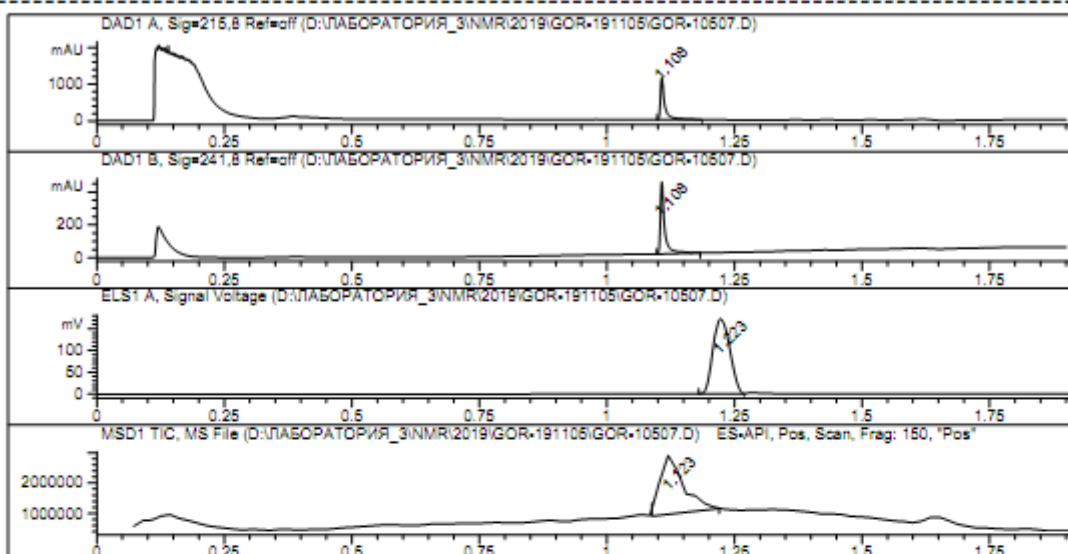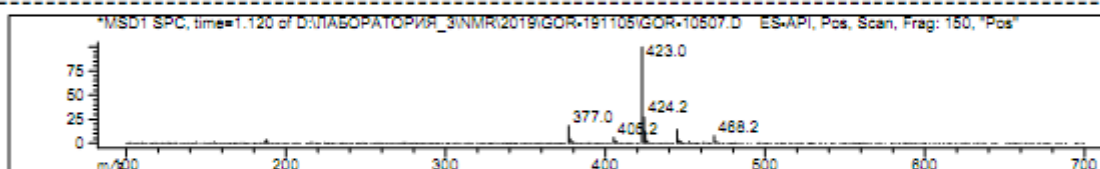

| # | Signal                    | R.Time | Area %  |
|---|---------------------------|--------|---------|
| 1 | DAD1 A, Sig=215,8 Ref=off | 1.108  | 100.000 |
| 1 | DAD1 B, Sig=241,8 Ref=off | 1.108  | 100.000 |
| 1 | ELS1 A, Signal Voltage    | 1.223  | 100.000 |
| 1 | MSD1 TIC, MS File         | 1.123  | 100.000 |

Inj. Date 05.11.2019

Figure S62. MS (ESI) spectrum of compound 5h.

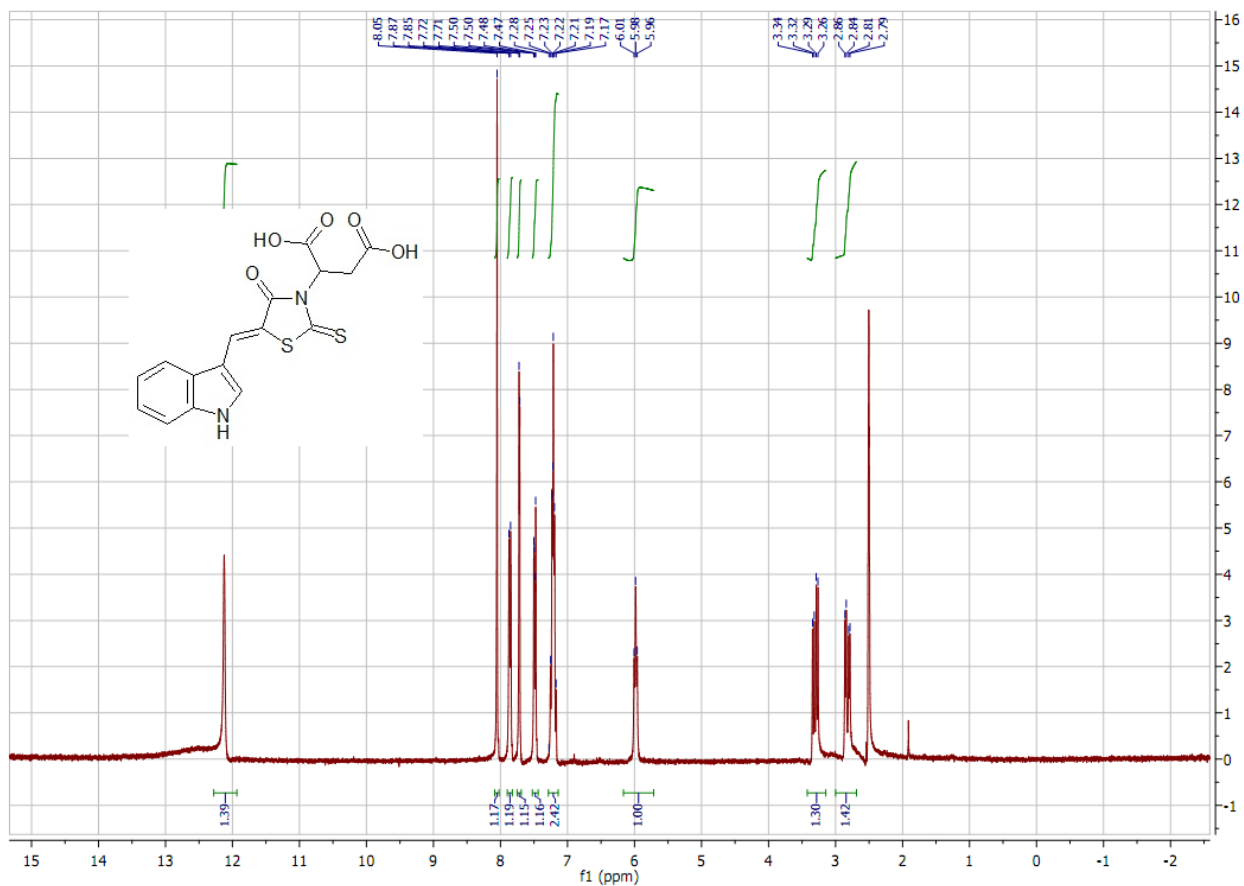

**Figure S63.**  $^1\text{H}$ NMR spectrum (300 MHz, DMSO- $d_6$ ) of compound **5i**.

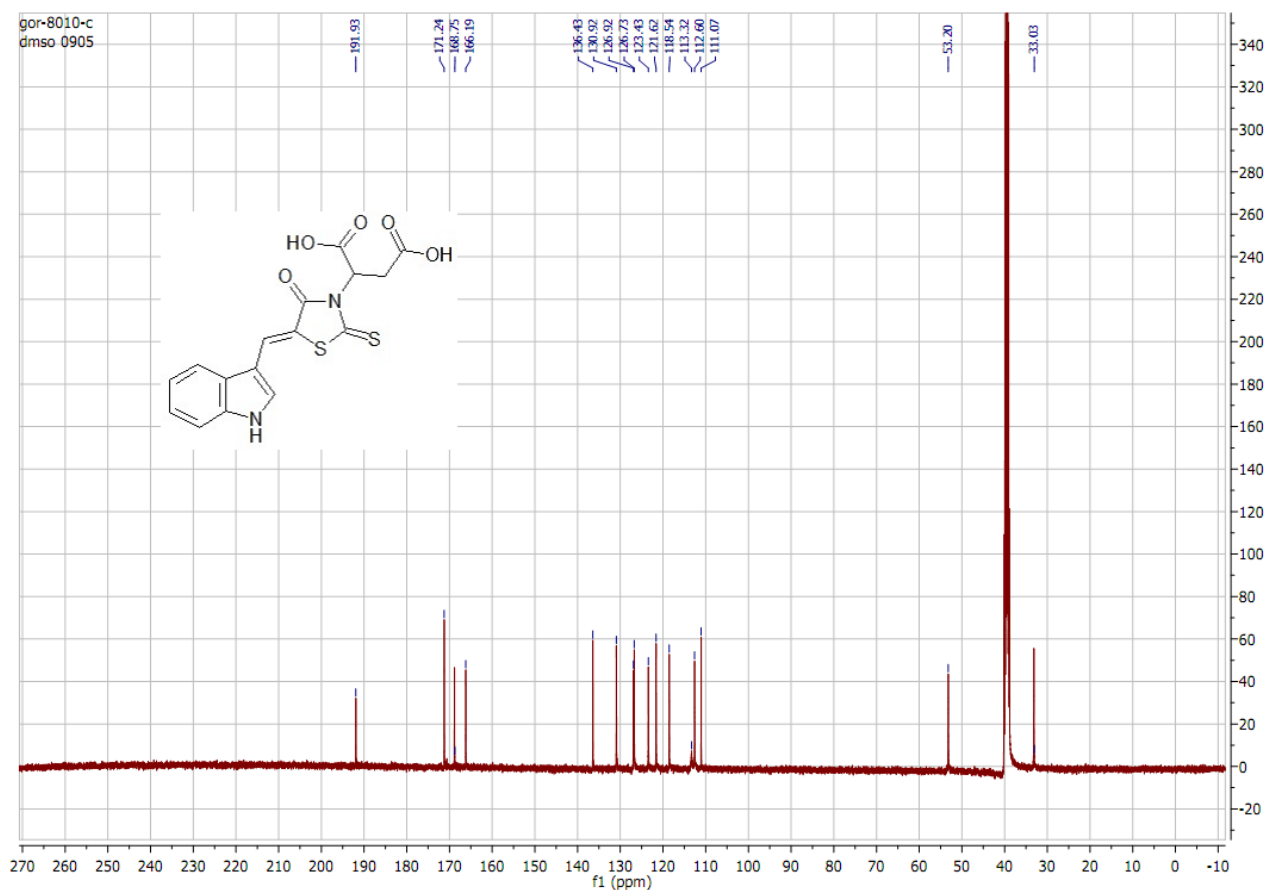

**Figure S64.**  $^{13}\text{C}$  NMR spectrum (101 MHz, DMSO- $d_6$ ) of compound **5i**.

-o.-Syntez Purity Report -o.-

System: Agilent 1200 LC/MSD SL  
 Separation column: Rapid Resolution HT Cartidge 4.6x30mm, 1.8-Micron, Zorbx SB-C18

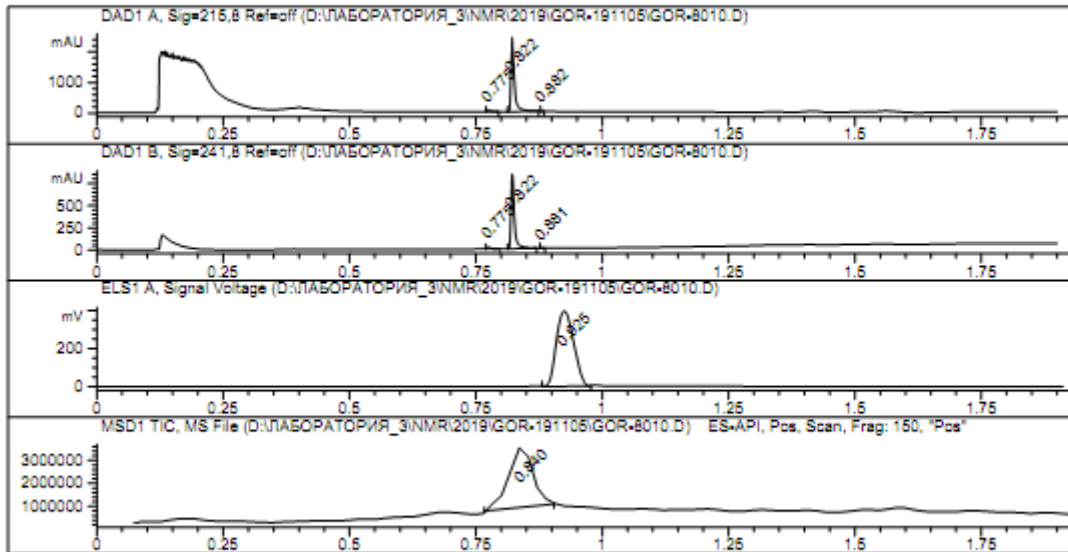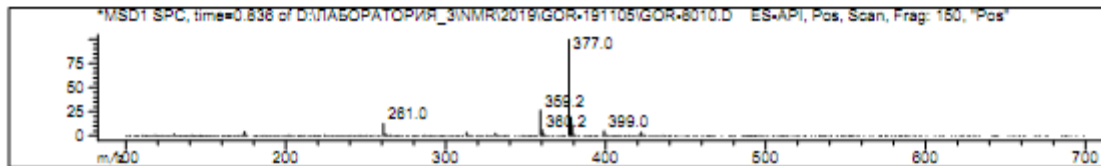

| # | Signal                    | R.Time | Area %  |
|---|---------------------------|--------|---------|
| 1 | DAD1 A, Sig=215,8 Ref=off | 0.775  | 3.142   |
| 2 |                           | 0.822  | 96.774  |
| 3 |                           | 0.882  | 0.085   |
| # | Signal                    | R.Time | Area %  |
| 1 | DAD1 B, Sig=241,8 Ref=off | 0.775  | 2.670   |
| 2 |                           | 0.822  | 97.100  |
| 3 |                           | 0.881  | 0.230   |
| # | Signal                    | R.Time | Area %  |
| 1 | ELS1 A, Signal Voltage    | 0.925  | 100.000 |
| # | Signal                    | R.Time | Area %  |
| 1 | MSD1 TIC, MS File         | 0.840  | 100.000 |

Inj. Data 06.11.2019

Figure S65. MS (ESI) spectrum of compound 5i.

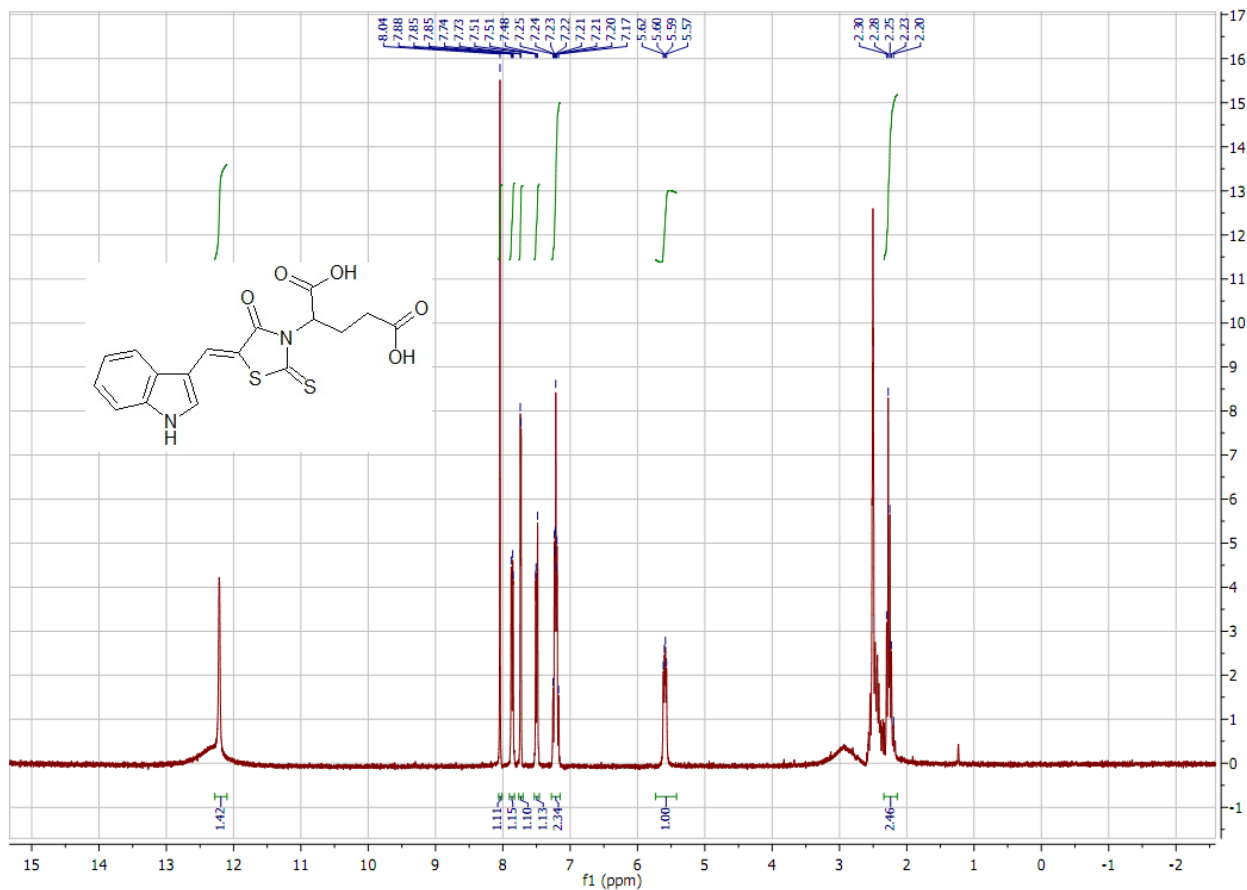

**Figure S66.** <sup>1</sup>H NMR spectrum (300 MHz, DMSO-d<sub>6</sub>) of compound **5j**.

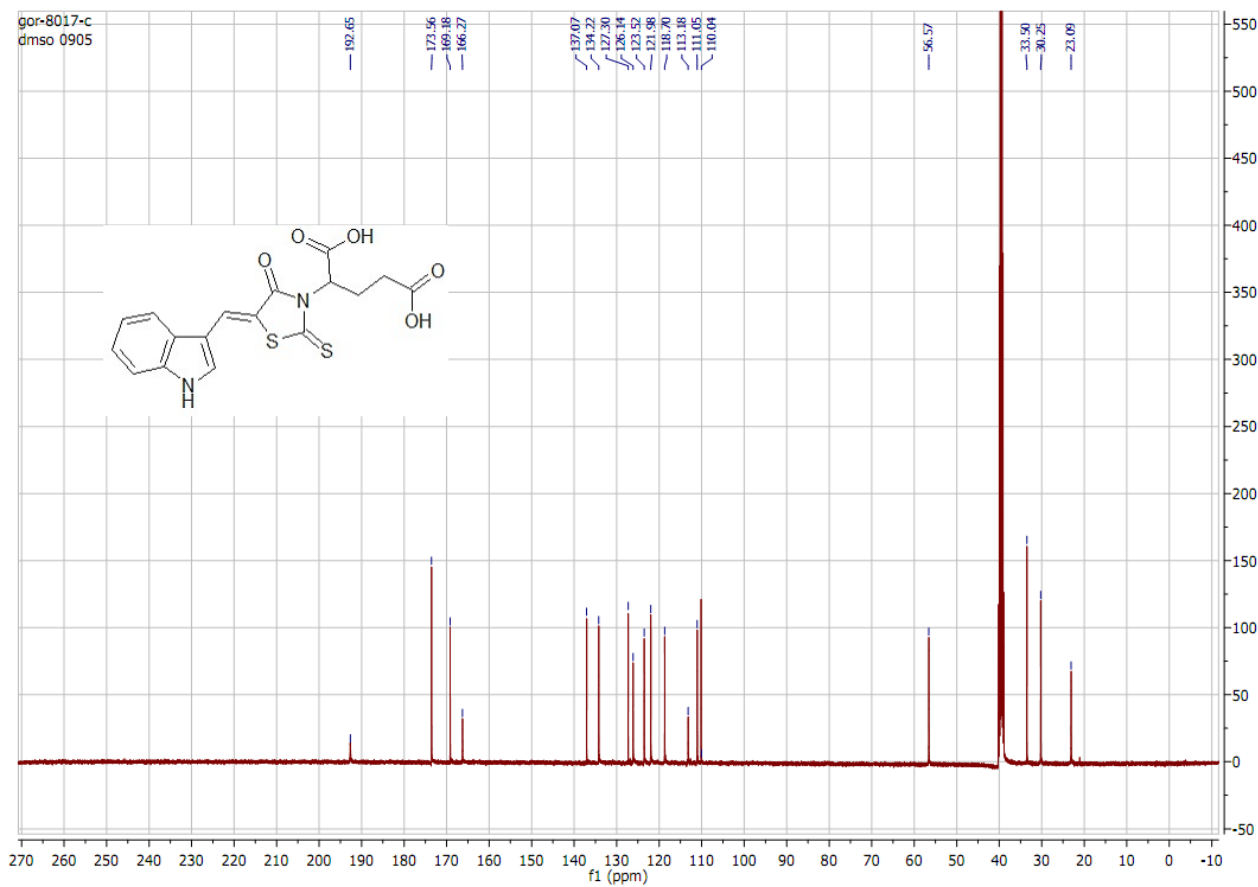

**Figure S67.** <sup>13</sup>C NMR spectrum (101 MHz, DMSO-d<sub>6</sub>) of compound **5j**.

-.o.-Syntez Purity Report -.o.-

System: Agilent 1200 LC/MSD SL  
 Separation column: Rapid Resolutionn HT Cartige 4.6x30mm, 1.8-Micron, Zorbx SB-C18

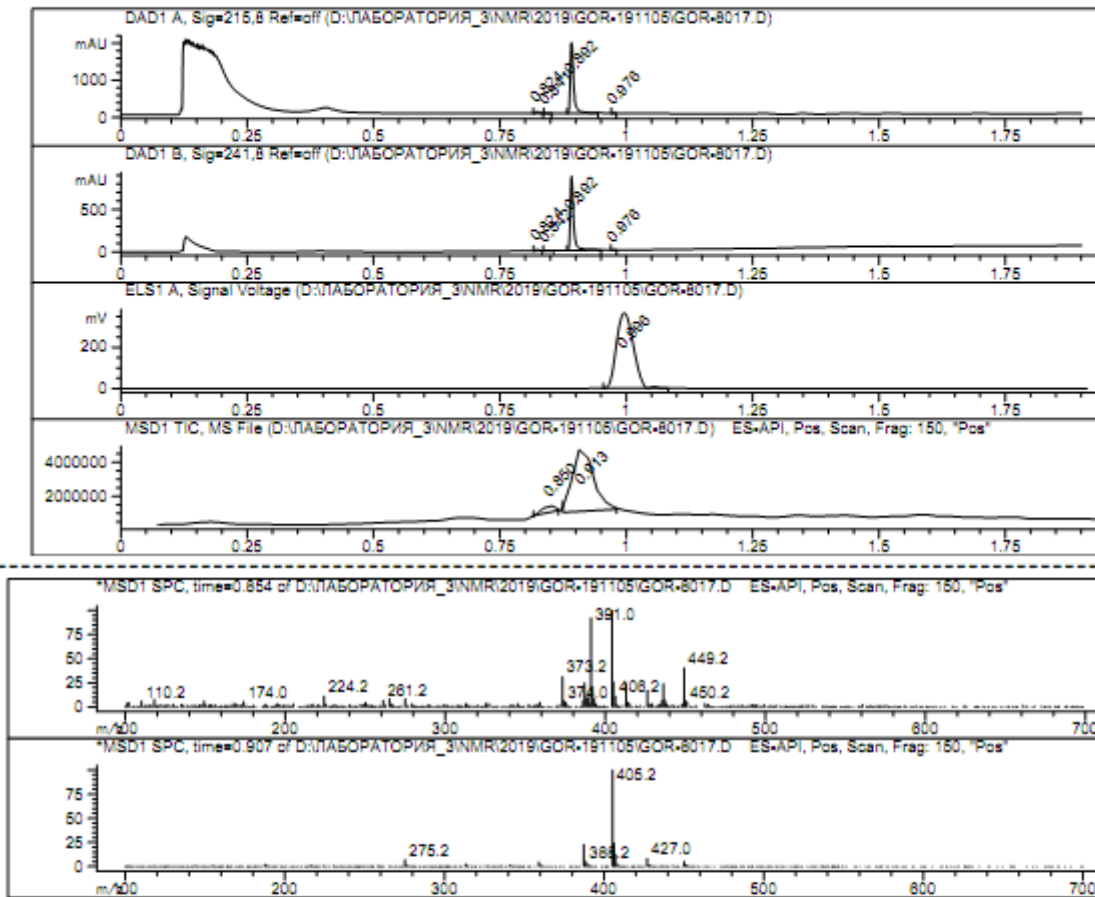

| #     | Signal                    | R.Time | Area %  |
|-------|---------------------------|--------|---------|
| 1     | DAD1 A, Sig=215,8 Ref=off | 0.824  | 2.024   |
| 2     |                           | 0.841  | 0.377   |
| 3     |                           | 0.892  | 97.395  |
| 4     |                           | 0.976  | 0.204   |
| ----- |                           |        |         |
| #     | Signal                    | R.Time | Area %  |
| 1     | DAD1 B, Sig=241,8 Ref=off | 0.824  | 1.643   |
| 2     |                           | 0.842  | 0.513   |
| 3     |                           | 0.892  | 97.629  |
| 4     |                           | 0.976  | 0.215   |
| ----- |                           |        |         |
| #     | Signal                    | R.Time | Area %  |
| 1     | ELS1 A, Signal Voltage    | 0.996  | 100.000 |
| ----- |                           |        |         |
| #     | Signal                    | R.Time | Area %  |
| 1     | MSD1 TIC, MS File         | 0.850  | 6.581   |
| 2     |                           | 0.913  | 93.419  |

Inj. Data 06.11.2019

Figure S68. MS (ESI) spectrum of compound 5j.

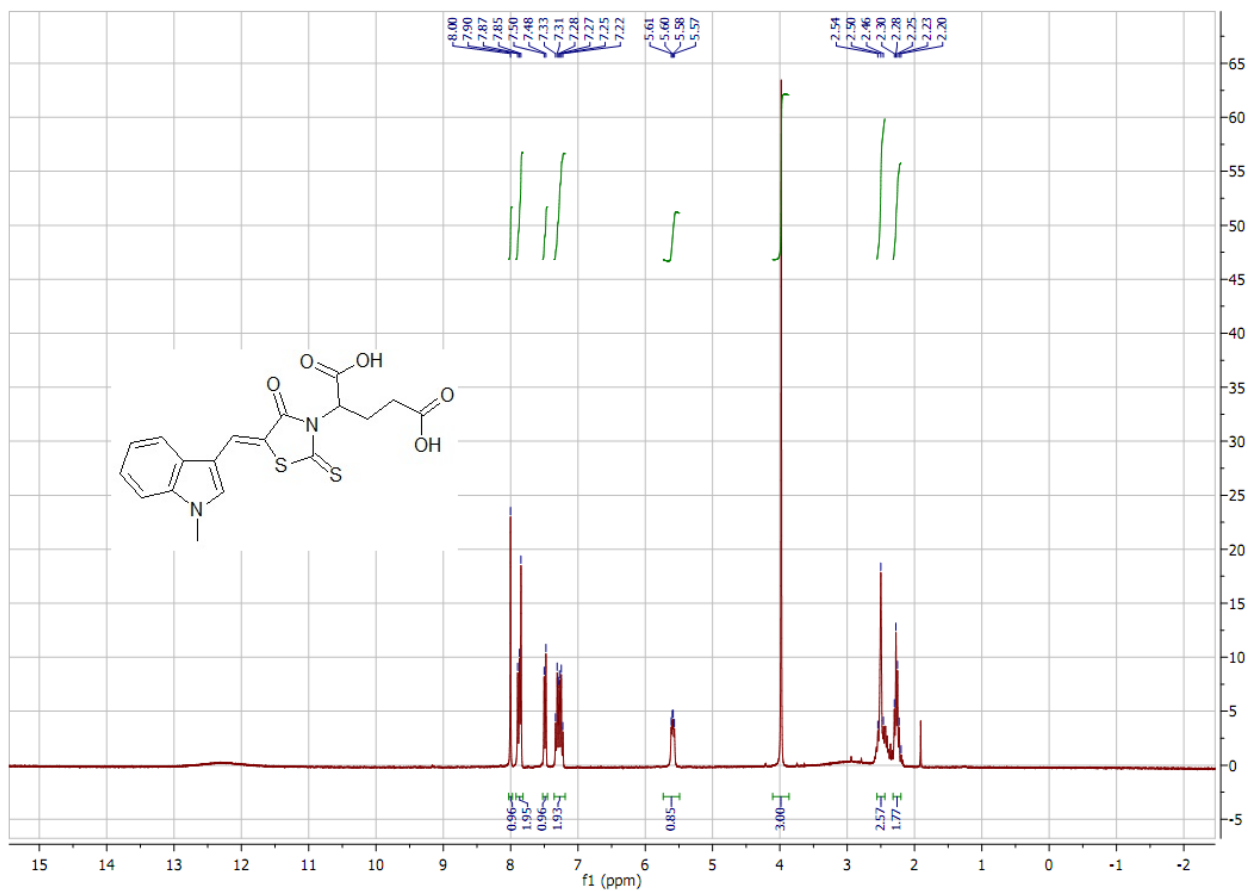

**Figure S69.** <sup>1</sup>H NMR spectrum (300 MHz, DMSO-d<sub>6</sub>) of compound **5k**.

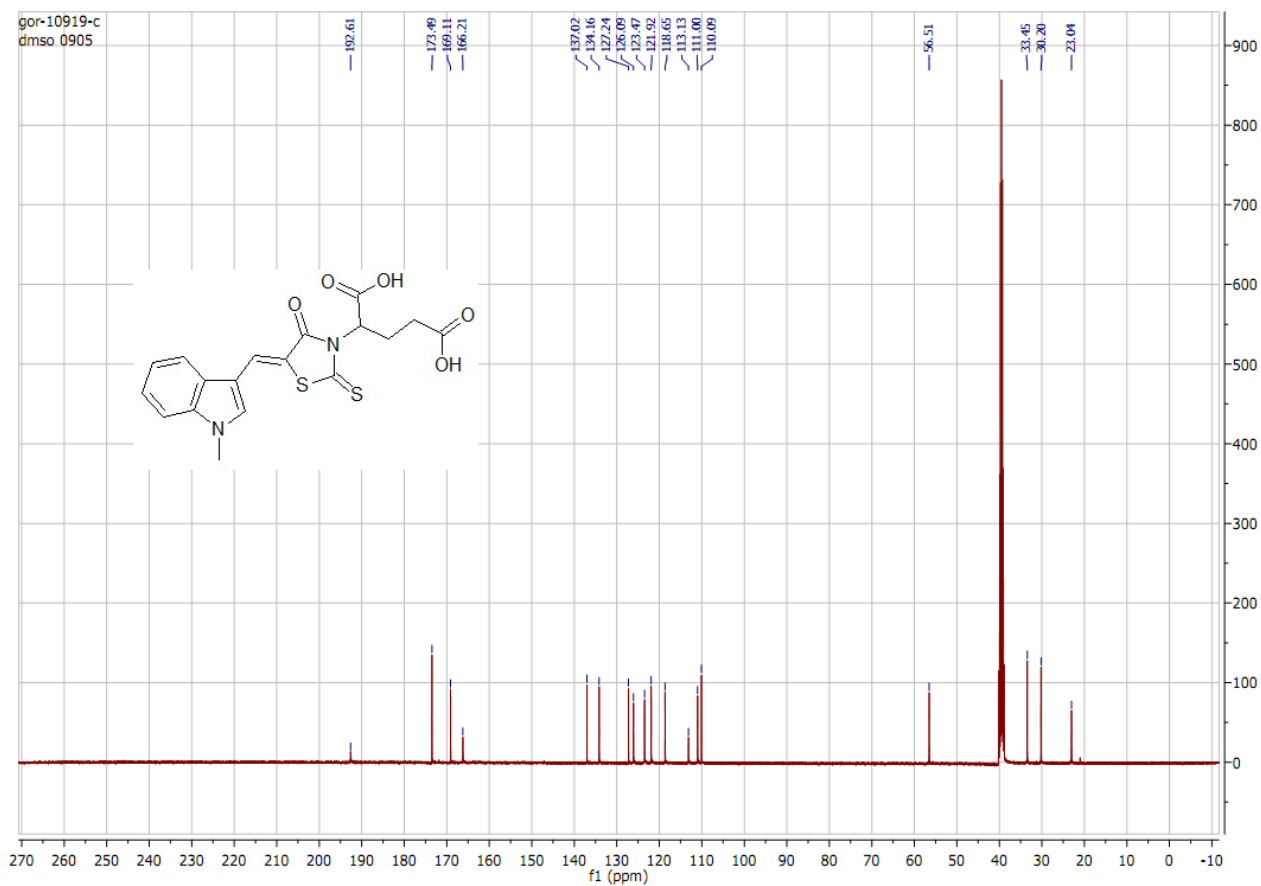

**Figure S70.** <sup>13</sup>C NMR spectrum (101 MHz, DMSO-d<sub>6</sub>) of compound **5k**.

-o.-SynTex Purity Report -o.-

System: Agilent 1200 LC/MSD SL  
 Separation column: Rapid Resolution HT Cartige 4.6x30mm, 1.8-Micron, Zorbx SB-C18

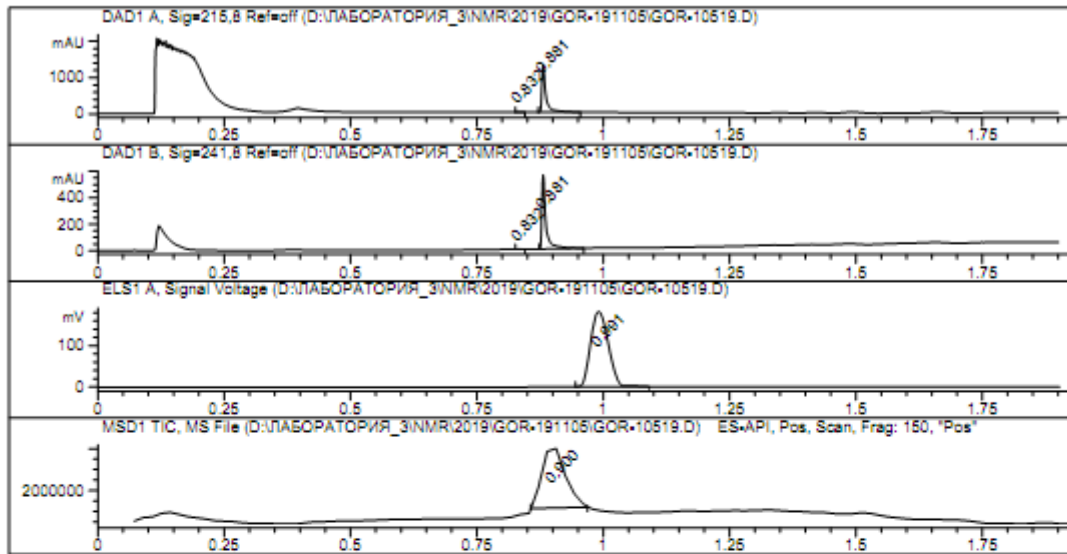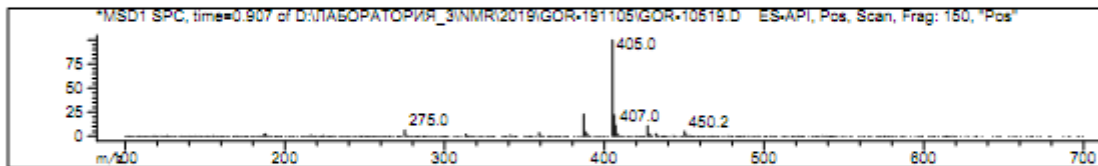

| # | Signal                    | R.Time | Area %  |
|---|---------------------------|--------|---------|
| 1 | DAD1 A, Sig=215,8 Ref=off | 0.832  | 0.394   |
| 2 |                           | 0.881  | 99.606  |
| # | Signal                    | R.Time | Area %  |
| 1 | DAD1 B, Sig=241,8 Ref=off | 0.832  | 0.785   |
| 2 |                           | 0.881  | 99.215  |
| # | Signal                    | R.Time | Area %  |
| 1 | ELS1 A, Signal Voltage    | 0.991  | 100.000 |
| # | Signal                    | R.Time | Area %  |
| 1 | MSD1 TIC, MS File         | 0.900  | 100.000 |

Inj. Data 05.11.2019

**Figure S71.** MS (ESI) spectrum of compound **5k**.
